# Supplementary material for: Tectonothermal evolution in the core of an arcuate fold and thrust belt: the southeastern sector of the Cantabrian Zone (Variscan belt, NW Spain)
Source: Copernicus journal article supplement (doi:10.5194/se-2016-53), 2016-04-04
Supplement: Supplementary file 1 [file se-2016-53-supplement.pdf]

874 **Appendices (Supplement)**

875 **Appendix 1.** Conodont colour alteration index (CAI) values and temperatures inferred from the CAI Arrhenius  
876 plot (Epstein et al., 1977; Rejebian et al., 1987). (V: Valsurbio samples; P: Pisuerga-Carrión samples; Po:  
877 Ponga samples; Pe: Picos de Europa samples).

878 **Appendix 2.** Containing:

879 1. Values of Kübler Index (KI) measured on air dried (AD) *versus* KI measured on ethylene glycol solvated  
880 samples (EG), standardized at Kübler scale. Samples are grouped according to the areas outlined in Fig. 4.  
881 Samples with significant amounts of I/S and Pg-Pg/Ms that have not been plotted in Figs 6 and 7 are indicated  
882 with Roman letter type of smaller size.

883 2. Árkai Index (AI) has been measured on air dried samples (AD).

884 3. Clay minerals present in the samples. Capitals and bold type indicate more abundance of the phase.

885

886

887

888

M. L. Valín, S. García-López, C. Brime, F. Bastida and J. Aller  
Tectonothermal evolution in the core of an arcuate fold and thrust belt: the SE sector of the Cantabrian Zone  
(Variscan belt, NW Spain)

**APPENDIX 1**  
**CAI data**

| Locality | Stratigraphic unit | Sample age        | CAI (number of specimens) | Mean CAI value | Temperature range (°C) |
|----------|--------------------|-------------------|---------------------------|----------------|------------------------|
| V-01     | Portilla Fm        | Middle Givetian   | 5(2), 5.5(4)              | 5.3            | 320-355                |
| V-02     | Portilla Fm        | Middle Givetian   | 5(3)                      | 5.0            | 305-335                |
| V-03     | Portilla Fm        | Middle Givetian   | 4.5(1)                    | 4.5            | 240-280                |
| V-04a    | Portilla Fm        | Givetian          | 5.5(42)                   | 5.5            | 340-375                |
| V-04b    | Camporredondo Fm   | Givetian-Frasnian | 5.5(13), 6(3)             | 5.6            | 350-385                |
| V-04c    | Alba Fm            | Visean            | 5.5-6(4), 6(2), 7(1)      | 6.0            | 380-420                |
| V-05     | Portilla Fm        | Middle Givetian   | 5.5(4)                    | 5.5            | 340-375                |
| V-06     | Portilla Fm        | Middle Givetian   | 5(12), 5-5.5(8)           | 5.2            | 315-345                |
| V-07     | Camporredondo Fm   | Famennian         | 5(30), 5.5(19)            | 5.2            | 315-345                |
| V-08     | Alba Fm            | Visean            | 5(20), 5-5.5(2), 5.5(22)  | 5.3            | 320-355                |
| V-09     | Portilla Fm        | Middle Givetian   | 5-5.5(2)                  | 5.3            | 320-355                |
| V-10a    | Santa Lucía Fm     | Upper Emsian      | 5.5(7)                    | 5.5            | 340-375                |
| V-10b    | Alba Fm            | Tournaisian       | 5.5(15), 6(20), 6.5(4)    | 5.9            | 380-410                |
| V-11     | Alba Fm            | Visean            | 7-8(1)                    | 7.5            | 550-590                |
| V-12     | Alba Fm            | Visean            | 6(5), 7(1)                | 6.2            | 400-435                |
| V-13a    | Alba Fm            | Visean            | 6(3)                      | 6.0            | 380-420                |
| V-13b    | Barcaliente Fm     | Serpukhovian      | 5.5(3)                    | 5.5            | 340-375                |
| V-13c    | Prioro Gr          | Bashkirian        | 5(2)                      | 5.0            | 305-335                |
| V-14     | Alba Fm            | Visean            | 5.5(24), 6(10)            | 5.7            | 350-390                |
| V-15a    | Portilla Fm        | Middle Givetian   | 5(5), 5.5(13)             | 5.4            | 330-360                |
| V-15b    | Prioro Gr          | Bashkirian        | 5.5(14), 6(10)            | 5.7            | 350-390                |
| V-16a    | Alba Fm            | Visean            | 5(29), 5.5(21), 6(13)     | 5.4            | 330-360                |
| V-16b    | Prioro Gr          | Bashkirian        | 5(5), 5-5.5(2), 5.5(5)    | 5.3            | 320-355                |
| V-17     | Barcaliente Fm     | Serpukhovian      | 5-5.5(13)                 | 5.3            | 320-355                |
| V-18     | Alba Fm            | Visean            | 6(3)                      | 6.0            | 380-420                |
| V-19     | Alba Fm            | Visean            | 5-5.5(3)                  | 5.3            | 320-355                |
| V-22a    | Alba Fm            | Visean            | 5-5.5(2), 6(1)            | 5.5            | 340-375                |
| V-22b    | Barcaliente Fm     | Serpukhovian      | 5-5.5(2), 6(1)            | 5.5            | 340-375                |
| V-22c    | Prioro Gr          | Bashkirian        | 5.5(2)                    | 5.5            | 340-375                |
| V-24     | Santa Lucía Fm     | Upper Emsian      | 5(1), 5.5(2), 6(2)        | 5.6            | 350-385                |
| V-25     | Santa Lucía Fm     | Eifelian          | 5-5.5(20)                 | 5.3            | 320-355                |
| V-27     | Portilla Fm        | Middle Givetian   | 5(9), 5.5(2), 6(1)        | 5.2            | 315-345                |
| V-29a    | Barcaliente Fm     | Serpukhovian      | 5.5(3)                    | 5.5            | 340-375                |
| V-29b    | Prioro Gr          | Bashkirian        | 5.5(10)                   | 5.5            | 340-375                |
| V-58     | Portilla Fm        | Middle Givetian   | 5.5(2), 6(4), 7(3)        | 6.2            | 400-435                |
| V-61     | Santa Lucía Fm     | Upper Emsian      | 5.5(2), 6(2), 6.5-7(1)    | 6.0            | 380-420                |
| V-62     | La Vid Gr          | Emsian            | 6.5-7(2)                  | 6.8            | 470-510                |

|        |                 |                             |                                   |     |         |
|--------|-----------------|-----------------------------|-----------------------------------|-----|---------|
| V-73   | Portilla Fm     | Middle Givetian             | 5.5(2), 6(2)                      | 5.8 | 355-395 |
| V-75   | Brezo Limestone | Serpukhovian                | 5.5(2)                            | 5.5 | 340-375 |
| V-76   | Brezo Limestone | Serpukhovian                | 5.5(1)                            | 5.5 | 340-375 |
| V-77   | Portilla Fm     | Middle Givetian             | 5(10), 5.5-6(21)                  | 5.5 | 340-375 |
| V-148a | Vidrieros Fm    | Famennian                   | 3(20), 4 (6)                      | 3.2 | 130-165 |
| V-148b | Alba Fm         | Visean                      | 3-3.5(10), 4(10),4.5(1)           | 3.7 | 165-200 |
| V-195  | Brezo Limestone | Serpukhovian                | 5(1)                              | 5.0 | 305-335 |
| V-198  | Brezo Limestone | Serpukhovian                | 5.5(1)                            | 5.5 | 340-375 |
| V-601  | Portilla Fm     | Middle Givetian             | 5.5(3)                            | 5.5 | 340-375 |
| V-602  | Portilla Fm     | Middle Givetian             | 5.5(2)                            | 5.5 | 340-375 |
| V-717  | Barcaliente Fm  | Serpukhovian-<br>Bashkirian | 4-4.5(1)                          | 4.3 | 215-250 |
| V-718  | Portilla Fm     | Middle Givetian             | 5(10), 5.5-6(21)                  | 5.5 | 340-375 |
| P-1a   | Gustalapedra Fm | Eifelian                    | 2(2), 2.5(7), 3(43)               | 2.9 | 110-145 |
| P-1b   | Cardaño Fm      | Givetian                    | 3(10), 3.5(10)                    | 3.0 | 115-155 |
| P-2    | Polentinos Fm   | Emsian/Eifelian             | 2.5-3(6), 3(31),3-3.5(20), 3.5(9) | 3.3 | 140-175 |
| P-3    | Polentinos Fm   | Emsian                      | 3(1), 3.5(22), 4(1)               | 3.5 | 150-185 |
| P-6    | Abadía Fm       | Upper Emsian                | 4(14), 4-4.5(3), 4.5(16)          | 4.3 | 215-250 |
| P-7    | Polentinos Fm   | Emsian/Eifelian             | 3(3), 4(17), 4.5(4)               | 4.0 | 190-225 |
| P-11   | Polentinos Fm   | Emsian                      | 4(3), 4.5(5)                      | 4.3 | 215-250 |
| P-12   | Cardaño Fm      | Upper Givetian              | 4.5(21), 5(11)                    | 4.7 | 265-300 |
| P-13   | Polentinos Fm   | Emsian/Eifelian             | 4(21), 4-4.5(5)                   | 4.0 | 190-225 |
| P-14   | Cardaño Fm      | Upper Givetian              | 4.5(2), 5(3), 5.5(3)              | 5.1 | 310-340 |
| P-15   | Polentinos Fm   | Emsian/Eifelian             | 3.5(6), 4(31), 4.5(5)             | 4.0 | 190-225 |
| P-16   | Cardaño Fm      | Givetian                    | 4.5(27), 5(2), 5.5(2)             | 4.6 | 255-290 |
| P-17   | Polentinos Fm   | Upper Emsian                | 4.5(2)                            | 4.5 | 240-280 |
| P-18   | Polentinos Fm   | Upper Emsian                | 4.5(2)                            | 4.5 | 240-280 |
| P-19   | Polentinos Fm   | Upper Emsian                | 4.5(2)                            | 4.5 | 240-280 |
| P-20   | Cardaño Fm      | Frasnian                    | 4.5(16), 5(2)                     | 4.6 | 255-290 |
| P-21   | Cardaño Fm      | Upper Givetian              | 4.5(18)                           | 4.5 | 240-280 |
| P-22a  | Cardaño Fm      | Givetian/Frasnian           | 4(11), 4.5(15), 5(2), 5.5(4)      | 4.5 | 245-280 |
| P-22b  | Gustalapedra Fm | Eifelian                    | 4(1), 5(16)                       | 4.9 | 290-320 |
| P-23   | Polentinos Fm   | Emsian                      | 4.5(3), 5.5(15), 6(1)             | 5.4 | 330-360 |
| P-27a  | Polentinos Fm   | Eifelian                    | 4.5(3)                            | 4.5 | 240-280 |
| P-27b  | Cardaño Fm      | Frasnian                    | 4.5(45), 5(61), 5.5(2)            | 4.8 | 280-315 |
| P-28   | Cardaño Fm      | Frasnian                    | 4.5(17), 5(27), 5.5(17), 6(6)     | 5.1 | 310-340 |
| P-30   | Cardaño Fm      | Upper Givetian              | 4.5(22), 4.5-5(6), 5(26), 5.5(5)  | 4.8 | 280-315 |
| P-31   | Cardaño Fm      | Upper Givetian              | 5(10)                             | 5.0 | 305-335 |
| P-32   | Polentinos Fm   | Emsian/Eifelian             | 2(5), 2.5(22), 2.5-3(19), 3(13)   | 2.6 | 90-125  |
| P-34a  | Polentinos Fm   | Emsian/Eifelian             | 5(4), 6.5(2)                      | 5.5 | 340-375 |
| P-34b  | Cardaño Fm      | Frasnian                    | 5(4), 5.5(2)                      | 5.2 | 315-345 |
| P-35   | Polentinos Fm   | Upper Emsian                | 5.5-6(2)                          | 5.8 | 355-410 |
| P-36   | Cardaño Fm      | Givetian                    | 6-6.5(1)                          | 6.3 | 420-450 |
| P-37   | Abadía Fm       | Emsian                      | 2(3), 2.5(23), 3(13)              | 2.6 | 90-125  |
| P-39   | Gustalapedra Fm | Eifelian                    | 3-3.5(1), 3.5-4(1)                | 3.5 | 150-185 |
| P-40   | Polentinos Fm   | Eifelian                    | 2.5(15), 3(6), 3-3.5(1)           | 2.7 | 100-130 |
| P-41   | Polentinos Fm   | Eifelian                    | 3(1), 4(13),4.5(6)                | 4.1 | 195-235 |

|       |                 |                    |                                  |     |         |
|-------|-----------------|--------------------|----------------------------------|-----|---------|
| P-42  | Cardaño Fm      | Upper Givetian     | 4.5(12), 5(12), 5.5(12)          | 5.0 | 305-335 |
| P-44  | Abadía Fm       | Pragian            | 5(4)                             | 5.0 | 305-335 |
| P-46  | Abadía Fm       | Emsian             | 4(12), 4.5(6), 4.5-5(3)          | 4.3 | 215-250 |
| P-47  | Lebanza Fm      | Pragian            | 4.5-5(1), 5(27), 5.5(2)          | 5.0 | 305-335 |
| P-48  | Lebanza Fm      | Pragian            | 4(11), 4-4.5(17), 4.5(16)        | 4.5 | 240-280 |
| P-49  | Abadía Fm       | Emsian             | 4(4), 4.5(81), 5(13), 5.5(7)     | 4.6 | 255-290 |
| P-50  | Abadía Fm       | Emsian             | 1.5(5), 2(7), 2.5(11)            | 2.1 | 55-90   |
| P-51  | Carazo Fm       | Upper Pridoli      | 4(6), 4.5(29), 5(8)              | 4.5 | 240-280 |
| P-52  | Lebanza Fm      | Lochkovian/Pragian | 3.5(15), 4(59), 4.5(134)         | 4.3 | 215-250 |
| P-53  | Abadía Fm       | Emsian             | 1.5(2), 2(3), 2.5(7)             | 2.2 | 60-95   |
| P-54  | Abadía Fm       | Emsian             | 4-4.5(1)                         | 4.3 | 215-250 |
| P-55  | Carazo Fm       | Upper Pridoli      | 4.5(4), 4.5-5(4), 5(16), 5.5(18) | 5.1 | 310-340 |
| P-56  | Lebanza Fm      | Pragian            | 4.5(100), 4-4.5(3), 5(6), 5.5(8) | 4.6 | 225-290 |
| P-59  | Vidrieros Fm    | Famennian          | 6(4), 6.5(21)                    | 6.4 | 430-460 |
| P-60  | ?               | Devonian           | 6(2)                             | 6   | 380-420 |
| P-67  | Cardaño Fm      | Frasnian           | 4.5(2), 5(2)                     | 4.8 | 280-315 |
| P-78  | Carazo Fm       | Lochkovian         | 4(18)                            | 4   | 190-225 |
| P-79  | Villabellaco Fm | Tournaisian        | 2(36)                            | 2   | 52-80   |
| P-80  | Vidrieros Fm    | Famennian          | 4(44)                            | 4   | 190-225 |
| P-81  | Muda Fm         | Bashkirian         | 3(9)                             | 3   | 115-155 |
| P-82  | Villabellaco Fm | Tournaisian        | 2(8)                             | 2   | 52-80   |
| P-83  | Brañosera Fm    | Kasimovian         | 1.5(3)                           | 1.5 | <40-60  |
| P-84a | Gustalapedra Fm | Eifelian           | 4.5-5(3), 5(13), 5.5(11)         | 5.1 | 310-340 |
| P-84b | Cardaño Fm      | Frasnian           | 4.5(8), 5(14)                    | 4.8 | 280-320 |
| P-85  | Vidrieros Fm    | Famennian          | 4.5(11), 5(2)                    | 4.6 | 255-290 |
| P-86  | Alba Fm         | Visean             | 5-5.5(6)                         | 5.3 | 320-355 |
| P-87  | Vidrieros Fm    | Famennian          | 4.5(13)-5.5(45)                  | 5.3 | 320-355 |
| P-88a | Vidrieros Fm    | Famennian          | 5(15), 5.5(16)                   | 5.3 | 320-355 |
| P-88b | Alba Fm         | Visean             | 5(10), 5.5(30), 6(5)             | 5.4 | 330-360 |
| P-89  | Alba Fm         | Tournaisian        | 5.5(27), 6(48)                   | 5.8 | 355-395 |
| P-90  | Vidrieros Fm    | Tournaisian        | 5.5(10), 6(40)                   | 5.9 | 375-410 |
| P-91  | Olistolith      | Givetian           | 4(6)                             | 4   | 190-225 |
| P-92  | Prioro Gr       | Moscovian          | 5-5.5(3), 6(4)                   | 5.7 | 350-390 |
| P-93a | Olistolith      | Tournaisian        | 6-7(2)                           | 6.5 | 440-470 |
| P-93b | Olistolith      | Visean             | 5(29), 5.5(28), 5.5-6(11), 6(37) | 5.6 | 355-385 |
| P-94a | Cardaño Fm      | Givetian           | 4-4.5(2)                         | 4.3 | 215-250 |
| P-94b | Vidrieros Fm    | Famennian          | 4(10), 4.5(10), 5.5(7), 6(6)     |     |         |
| P-94c | Alba Fm         | Tournaisian        | 4-4.5(4)                         | 4.3 | 215-250 |
| P-95  | Prioro Gr       | Bashkirian         | 1.5(11)                          | 1.5 | <40-60  |
| P-96  | Alba Fm         | Visean             | 4.5(10)                          | 4.5 | 240-280 |
| P-97a | Cardaño Fm      | Upper Givetian     | 4(5), 4.5(32)                    | 4.4 | 230-265 |
| P-97b | Vidrieros Fm    | Famennian          | 4(2), 4.5(2)                     | 4.3 | 215-250 |
| P-98a | ?               | Lower Devonian     | 5.5(1)                           | 5.5 | 340-375 |
| P-98b | Vidrieros Fm    | Famennian          | 5(80), 5.5(33)                   | 5.1 | 310-340 |
| P-99  | Olistolith      | Famennian          | 5-5.5(11), 6(1)                  | 5.3 | 320-355 |
| P-100 | ?               | Carboniferous      | 6(1)                             | 6   | 380-420 |

|        |                        |                      |                            |     |         |
|--------|------------------------|----------------------|----------------------------|-----|---------|
| P-104  | Perapertú Fm           | Moscovian            | 4(10), 4.5(10)             | 4.3 | 215-250 |
| P-108  | Cea Fm                 | Moscovian/Kasimovian | 5-5.5(2)                   | 5.3 | 320-355 |
| P-109  | Castellería Lms        | Upper Moscovian      | 6(3)                       | 6   | 380-420 |
| P-113  | ?                      | Carboniferous        | 4(1)                       | 4   | 190-225 |
| P-125  | ?                      | Devonian             | 7(3)                       | 7   | 500-535 |
| P-126  | Brañosera Fm           | Kasimovian           | 1.5(1), 2(1)               | 1.8 | 45-70   |
| P-129  | Verdegosa Fm           | Moscovian            | 4(3)                       | 4   | 190-225 |
| P-130  | Ojosa Fm               | Moscovian            | 4(1), 4-4.5(4), 5(2)       | 4.4 | 230-265 |
| P-133  | Villabellaco Fm        | Visean               | 3.5(5), 4(5)               | 3.8 | 175-215 |
| P-134  | Lebanza Fm             | Lochkovian/Pragian   | 4.5(6), 5(2)               | 4.6 | 255-290 |
| P-135  | Abadía Fm              | Lower Emsian         | 4-4.5(10), 5-5.5(10)       | 4.8 | 280-315 |
| P-136  | Abadía Fm              | Lower Emsian         | 4(4)                       | 4   | 190-225 |
| P-137  | Cardaño Fm             | Frasnian             | 5(39), 5.5(17), 6(1)       | 5.2 | 315-345 |
| P-138  | Lebanza Fm             | Pragian              | 3.5(7), 4(17), 4.5(10)     | 4   | 190-225 |
| P-139  | Abadía Fm              | Emsian               | 4(8), 4.5(8)               | 4.8 | 280-315 |
| P-140  | Abadía Fm              | Emsian               | 4(8), 4-4.5(3), 4.5(3)     | 4.2 | 210-240 |
| P-141  | Lebanza Fm             | Lochkovian/Pragian   | 4(3), 4.5(1)               | 4.1 | 195-235 |
| P-142  | Abadía Fm              | Emsian               | 4(7)                       | 4   | 190-225 |
| P-143  | Gustalapedra Fm        | Eifelian             | 5(3), 5.5(2)               | 5.2 | 315-345 |
| P-144  | Cardaño Fm             | Givetian             | 5(4), 5.5(3)               | 5.2 | 315-345 |
| P-145  | Vidrieros Fm           | Famennian            | 5(5), 5.5(2), 6(2), 7(1)   |     |         |
| P-146  | Abadía Fm              | Emsian               | 5.5(5), 6(2)               | 5.6 | 345-385 |
| P-147  | Alba Fm                | Visean               | 5-5.5(3), 6(2), 7(2)       |     |         |
| P-148  | Vidrieros Fm           | Famennian            | 4.5(18), 5(10)             | 4.7 | 265-300 |
| P-149a | Vidrieros Fm           | Famennian            | 5(20), 5.5(10)             | 5.2 | 315-345 |
| P-149b | Alba Fm                | Visean               | 5(22), 5.5(31), 6(36)      | 5.7 | 350-390 |
| P-150  | Barcaliente Fm         | Serpukhovian         | 4.5-5(20), 5(20)           | 4.9 | 290-320 |
| P-151a | Cardaño Fm             | Frasnian             | 5(40), 5.5(20), 6(8), 7(6) |     |         |
| P-151b | Vidrieros Fm           | Famennian            | 5(3), 5-5.5(9)             | 5.2 | 315-345 |
| P-152  | Alba Fm                | Visean               | 5-5.5(8), 6(2)             | 5.4 | 330-360 |
| P-153  | Barcaliente Fm         | Serpukhovian         | 5-5.5(6), 6.5(4)           | 5.8 | 355-395 |
| P-154  | Vidrieros Fm           | Famennian            | 5(30), 5-5.5(6), 5.5 (30)  | 5.3 | 320-355 |
| P-155  | Alba Fm                | Visean               | 5(10), 5-5.5(12)           | 5.1 | 310-340 |
| P-156  | Barcaliente Fm         | Serpukhovian         | 5(3), 5.5(10)              | 5.4 | 330-360 |
| P-157  | Alba Fm                | Visean               | 4(3), 4.5-5(3)             | 4.4 | 230-265 |
| P-158  | Pando Group            | Upper Moscovian      | 5(3), 5.5(6), 6(2)         | 5.5 | 340-375 |
| P-159  | Olistolith             | Emsian               | 4(2)                       | 4   | 190-225 |
| P-161a | Vidrieros Fm           | Famennian            | 5(60)                      | 5   | 305-335 |
| P-161b | Alba Fm                | Visean               | 5.5-6(40)                  | 5.8 | 355-395 |
| P-162a | Pebbles in Pando<br>Gr | Pragian              | 5(20)                      | 5   | 305-335 |
| P-162b | Pebbles in Pando<br>Gr | Givetian             | 5(20), 5.5(10)             | 5.2 | 315-345 |
| Po-172 | Ermita Fm              | Famennian            | 5(2)                       | 5   | 305-335 |
| Po-173 | Alba Fm                | Visean               | 4.5(1), 5(1), 6(1), 7(2)   |     |         |
| P-174  | Pando Gr               | Moscovian            | 6-6.5(2)                   | 6.3 | 420-450 |
| P-178a | Cardaño Fm             | Frasnian             | 5(2), 5.5(3)               | 5.3 | 320-355 |

|        |                 |                     |                                  |     |         |
|--------|-----------------|---------------------|----------------------------------|-----|---------|
| P-178b | Vidrieros Fm    | Tournaisian         | 5(3), 5.5(10)                    | 5.4 | 330-360 |
| P-178c | Alba Fm         | Visean              | 5(8), 5.5(10), 6(5)              | 5.4 | 330-360 |
| P-179  | Olistolith      | Famennian           | 5.5(15), 6(20), 6.5(4)           | 5.9 | 375-410 |
| P-180  | Pando Gr        | Moscovian           | 4(2), 4.5(1), 5(2)               | 4.5 | 240-280 |
| P-181  | Olistolith      | Famennian-Visean    | 4.5(2)                           | 4.5 | 240-280 |
| P-182  | Olistolith      | Lower Devonian      | 4(3)                             | 4   | 190-225 |
| P-183  | Olistolith      | Middle Devonian     | 4(2)                             | 4   | 190-225 |
| P-184  | Olistolith      | Famennian-Visean    | 4(1)                             | 4   | 190-225 |
| P-185  | Olistolith      | Famennian-Visean    | 5.5(2)                           | 5.5 | 340-375 |
| P-186  | Olistolith      | Famennian-Visean    | 5.5(1)                           | 5.5 | 340-375 |
| Po-187 | Alba Fm         | Visean              | 5-5.5(1), 5.5(1)                 | 5.4 | 330-360 |
| Po-188 | Alba Fm         | Visean              | 4(7), 4.5(5), 5-5.5(1), 6(2)     |     |         |
| Po-189 | Alba Fm         | Serpukhovian        | 2(4), 3(2)                       | 2.3 | 79-105  |
| P-190  | Remoña Gr       | Gzhelian            | 4.5(2)                           | 4.5 | 240-280 |
| P-191  | Olistolith      | Kasimovian-Gzhelian | 4.5(2), 5(3), 5.5(2)             | 5   | 305-335 |
| Pe-192 | Alba Fm         | Visean              | 4(22), 4-4.5(18), 4.5(10)        | 4.2 | 210-240 |
| Pe-193 | Alba Fm         | Visean              | 4.5(1)                           | 4.5 | 240-280 |
| Pe-194 | ?               | Kasimovian          | 2.5(1), 3(2)                     | 2.8 | 105-140 |
| Pe-195 | Barcaliente Fm  | Serpukhovian        | 4(1)                             | 4   | 190-225 |
| Pe-196 | Barcaliente Fm  | Serpukhovian        | 3.5(4), 4(2)                     | 3.7 | 165-200 |
| Pe-197 | Picos de Europa | Moscovian           | 4(2)                             | 4   | 190-225 |
| Pe-198 | Picos de Europa | Moscovian           | 3(10), 3.5(31), 4(58), 4-4.5(18) | 3.8 | 175-215 |
| Pe-199 | Baleas Fm       | Tournaisian         | 4(3)                             | 4   | 190-225 |
| Pe-200 | Barcaliente Fm  | Serpukhovian        | 3.5(1), 4(2)                     | 3.8 | 175-215 |
| Pe-201 | Picos de Europa | Moscovian           | 3(6), 3.5(5)                     | 3.2 | 130-165 |
| Pe-202 | Picos de Europa | Kasimovian          | 3(3)                             | 3   | 115-155 |
| P-217a | Cardaño Fm      | Givetian            | 5(7), 5.5-6(2)                   | 5.2 | 315-345 |
| P-217b | Villabellaco Fm | Tournaisian         | 4.5(4), 5(21), 5.5(10), 6(2)     | 5.1 | 310-340 |
| P-217c | Prioro Gr       | Bashkirian          | 5(1), 5.5(1)                     | 5.3 | 320-355 |
| P-232  | Prioro Gr       | Bashkirian          | 7(1)                             | 7   | 500-535 |
| P-239a | Abadía Fm       | Emsian              | 5(25), 5.5(3)                    | 5.1 | 310-340 |
| P-239b | Gustalapedra Fm | Givetian            | 5(10), 5.5(2)                    | 5.1 | 310-340 |
| P-239c | Cardaño Fm      | Frasnian            | 5(10), 5.5(12), 6(2)             | 5.3 | 320-355 |
| P-239d | Alba Fm         | Visean              | 4-4.5(3), 5(3)                   | 4.6 | 255-290 |
| P-240a | Cardaño Fm      | Frasnian            | 5(40), 5.5(30)                   | 5.2 | 315-345 |
| P-240b | Vidrieros Fm    | Famennian           | 5(3)                             | 5   | 305-335 |
| P-240c | Alba Fm         | Tournaisian         | 5-5.5(40)                        | 5.3 | 320-355 |
| P-300a | Vidrieros Fm    | Famennian           | 5(16), 5.5(15)                   | 5.2 | 315-345 |
| P-300b | Alba Fm         | Visean              | 5(7), 5.5(3)                     | 5.2 | 315-345 |

---

APPENDIX 2  
 Liébana

| Formation             | Area Code | SAMPLE | KI AD (°2θ)<br>AD standard | KI EG (°2θ)<br>EG standard | AI (°2θ) | Cld | Prl | Pg | I/S | Kln | Chl | C/V | Stp |
|-----------------------|-----------|--------|----------------------------|----------------------------|----------|-----|-----|----|-----|-----|-----|-----|-----|
| Campollo Remoña Group | 1         | PI 243 | 0.404                      | 0.379                      |          | Cld |     | Pg |     |     |     | C/V |     |
| Campollo Remoña Group | 1         | PI 244 | 0.283                      | 0.277                      | 0.195    |     |     | Pg |     |     | Chl | C/V |     |
| Campollo Remoña Group | 1         | PI 245 | 0.425                      | 0.397                      | 0.309    |     |     | Pg |     |     | Chl | C/V |     |
| Campollo Remoña Group | 1         | PI 246 | 0.415                      | 0.392                      | 0.220    |     |     | Pg |     |     | Chl | C/V |     |
| Campollo Remoña Group | 1         | PI 247 | 0.462                      | 0.415                      | 0.288    |     |     | Pg |     |     | Chl | C/V |     |
| Campollo Remoña Group | 1         | PI 251 | 0.443                      | 0.403                      |          |     | Prl | Pg |     |     |     |     |     |
| Campollo Remoña Group | 1         | PI 259 | 0.393                      | 0.372                      |          |     |     | Pg |     |     |     |     |     |
| Campollo Remoña Group | 1         | PI 260 | 0.442                      | 0.412                      | 0.275    |     | Prl | Pg |     |     | Chl | C/V |     |
| Campollo Remoña Group | 1         | PI C   | 0.352                      | 0.305                      | 0.196    |     |     |    | I/S |     | Chl |     |     |
| Viorna Group          | 1         | PI 156 | 0.436                      | 0.637                      |          |     | PRL | Pg | I/S |     | Chl |     |     |
| Viorna Group          | 1         | PI 157 | 0.517                      | 0.449                      |          |     | Prl | Pg | I/S |     | Chl |     |     |
| Viorna Group          | 1         | PI 158 | 0.344                      | 0.332                      | 0.244    |     |     | Pg |     |     | Chl |     |     |
| Pando Group           | 1         | PI 238 | 0.353                      | 0.391                      |          |     | PRL |    |     |     |     |     |     |
| Pando Group           | 1         | PI 258 | 0.415                      | 0.423                      | 0.231    |     |     | Pg |     |     | Chl |     |     |
| Pando Group           | 1         | PI 303 | 0.738                      | 0.584                      | 0.277    |     |     |    | I/S |     | Chl |     |     |
| Pando Group           | 1         | PI 304 | 0.519                      | 0.500                      | 0.251    | Cld |     |    | I/S |     | Chl |     |     |
| Pando Group           | 1         | PI 305 | 0.422                      | 0.395                      |          |     | PRL |    |     |     |     |     |     |
| Pando Group           | 1         | PI 306 | 0.393                      | 0.357                      | 0.205    |     |     | Pg |     |     | Chl |     |     |
| Pando Group           | 1         | PI 310 | 0.490                      | 0.492                      |          |     | Prl |    | I/S |     |     |     |     |
| Pando Group           | 1         | PI 311 | 0.581                      | 0.526                      |          |     |     |    | I/S |     |     |     |     |
| Pando Group           | 1         | PI 312 | 0.644                      | 0.518                      |          |     |     |    | I/S |     |     |     |     |
| Pando Group           | 1         | PI 313 | 0.542                      | 0.455                      |          |     |     | Pg | I/S |     | Chl |     |     |
| Pando Group           | 1         | PI 314 | 0.508                      | 0.420                      |          | Cld |     | Pg | I/S |     | Chl |     |     |
| Pando Group           | 1         | PI D   | 0.324                      | 0.294                      |          |     |     |    | I/S |     | Chl |     |     |
| Prioro Group          | 1         | PI 152 | 0.458                      | 0.407                      | 0.283    |     |     | Pg | I/S |     | Chl |     |     |
| Prioro Group          | 1         | PI 153 | 0.416                      | 0.366                      |          |     |     |    | I/S |     |     |     |     |
| Prioro Group          | 1         | PI 154 | 0.576                      | 0.371                      |          |     |     | Pg | I/S |     | Chl |     |     |
| Prioro Group          | 1         | PI 155 | 0.424                      | 0.370                      | 0.230    |     |     | Pg | I/S |     | Chl |     |     |
| Prioro Group          | 1         | PI 234 | 0.327                      | 0.346                      |          |     |     | Pg |     |     |     |     |     |
| Prioro Group          | 1         | PI 235 | 0.346                      | 0.351                      | 0.340    | Cld |     | Pg |     |     | Chl |     |     |
| Prioro Group          | 1         | PI 237 | 0.302                      | 0.306                      | 0.190    |     |     | Pg |     |     | Chl |     |     |
| Prioro Group          | 1         | PI 248 | 0.461                      | 0.460                      | 0.221    |     |     | Pg |     |     | Chl |     |     |
| Prioro Group          | 1         | PI 249 | 0.472                      | 0.493                      | 0.195    |     |     | Pg |     |     | Chl |     |     |
| Prioro Group          | 1         | PI 250 | 0.470                      | 0.428                      | 0.217    |     |     | Pg |     |     | Chl |     |     |
| Prioro Group          | 1         | PI 256 | 0.444                      | 0.425                      |          |     | Prl |    |     |     |     |     |     |
| Prioro Group          | 1         | PI 257 | 0.700                      | 0.545                      |          |     | Prl |    | I/S |     |     |     |     |
| Prioro Group          | 1         | PI 261 | 0.524                      | 0.447                      | 0.232    |     |     | Pg | I/S |     | Chl |     |     |
| Prioro Group          | 1         | PI 262 | 0.517                      | 0.410                      |          |     | Prl | Pg | I/S |     |     |     |     |
| Prioro Group          | 1         | PI 263 | 0.480                      | 0.418                      |          |     | Prl | Pg | I/S |     |     | C/V |     |
| Prioro Group          | 1         | PI 264 | 0.498                      | 0.439                      | 0.222    |     | Prl | Pg | I/S |     | Chl |     |     |
| Prioro Group          | 1         | PI 300 | 0.640                      | 0.545                      | 0.185    |     |     |    | I/S |     | Chl |     |     |
| Prioro Group          | 1         | PI 301 | 0.518                      | 0.439                      | 0.189    |     |     | Pg | I/S |     | Chl |     |     |
| Prioro Group          | 1         | PI 302 | 0.646                      | 0.560                      | 0.241    |     |     | Pg | I/S |     | Chl |     |     |
| Prioro Group          | 1         | PI 307 | 0.510                      | 0.443                      |          |     |     | Pg | I/S |     |     |     |     |
| Prioro Group          | 1         | PI 309 | 0.429                      | 0.411                      | 0.253    |     | Prl |    | I/S |     | Chl |     |     |
| Prioro Group          | 1         | PI 315 | 0.326                      | 0.324                      | 0.164    | Cld |     | Pg |     |     | Chl |     |     |

APPENDIX 2  
 Liébana

|              |   |        |       |       |       |         |     |     |     |
|--------------|---|--------|-------|-------|-------|---------|-----|-----|-----|
| Prioro Group | 1 | PI 600 | 0.406 | 0.415 |       | PRL     |     |     |     |
| Prioro Group | 1 | PI 601 | 0.821 | 0.646 | 0.242 |         | I/S | Chl |     |
| Prioro Group | 1 | PI 602 | 0.698 | 0.663 |       | Pri     | I/S |     |     |
| Prioro Group | 1 | PI 603 | 0.578 | 0.559 | 0.288 | Cld Pri | I/S |     | C/N |
| Prioro Group | 1 | PI 606 | 0.678 | 0.679 | 0.308 |         | I/S |     | C/N |
| Prioro Group | 1 | PI 607 | 0.652 | 0.586 |       | PRL     | I/S | Kln |     |
| Prioro Group | 1 | PI 608 | 0.538 | 0.568 | 0.357 | Pri     | I/S |     | C/N |
| Prioro Group | 1 | PI 609 | 0.744 | 0.723 | 0.472 | Pri     | I/S |     | C/N |
| Prioro Group | 1 | PI 610 | 0.397 | 0.415 | 0.206 | Cld     | Pg  | Chl |     |
| Prioro Group | 1 | PI 612 | 0.580 | 0.594 | 0.315 | Cld Pri | I/S | Chl | C/N |
| Devonian     | 1 | PI 240 | 0.291 | 0.295 |       | PRL     |     |     |     |
| Devonian     | 1 | PI 316 | 0.670 | 0.563 |       | Cld     | I/S | Chl |     |

APPENDIX 2  
 Valdeón

| Formation    | Area Code | SAMPLE | KI AD (°2θ)<br>AD standard | KI EG (°2θ)<br>EG standard | AI (°2θ) | Cld | Prl | Pg | I/S | Kln | Chl | C/V | Stp |
|--------------|-----------|--------|----------------------------|----------------------------|----------|-----|-----|----|-----|-----|-----|-----|-----|
| Viorna Group | 2         | PI 160 | 0.528                      | 0.423                      | 0.189    |     | Prl |    | I/S |     | Chl |     |     |
| Viorna Group | 2         | PI 161 | 0.307                      | 0.296                      | 0.197    | Cld |     |    | I/S |     | Chl |     |     |
| Viorna Group | 2         | PI 163 | 0.310                      | 0.299                      | 0.188    |     |     |    | I/S |     | Chl |     |     |
| Viorna Group | 2         | PI 164 | 0.349                      | 0.290                      | 0.161    |     |     |    | I/S |     | Chl |     |     |
| Viorna Group | 2         | PI 165 | 0.427                      | 0.369                      |          | Cld |     | Pg | I/S |     |     |     | STP |
| Viorna Group | 2         | PI 215 | 0.470                      | 0.415                      | 0.205    | Cld |     | Pg | I/S |     | Chl |     |     |
| Viorna Group | 2         | PI 216 | 0.411                      | 0.302                      |          |     |     | Pg | I/S |     |     |     |     |
| Viorna Group | 2         | PI 217 | 0.441                      | 0.401                      | 0.199    |     |     | Pg | I/S |     | Chl |     |     |
| Viorna Group | 2         | PI 218 | 0.457                      | 0.374                      | 0.221    | Cld |     |    | I/S |     | Chl |     |     |
| Viorna Group | 2         | PI 219 | 0.630                      | 0.476                      |          |     |     | Pg | I/S |     |     |     |     |
| Pando Group  | 2         | PI 220 | 0.357                      | 0.362                      | 0.207    |     |     | Pg |     |     | Chl |     |     |
| Pando Group  | 2         | PI 222 | 0.486                      | 0.432                      | 0.280    |     |     | Pg | I/S |     | Chl |     |     |
| Pando Group  | 2         | PI 223 | 0.354                      | 0.321                      | 0.203    |     |     | Pg |     |     | Chl |     |     |
| Pando Group  | 2         | PI 224 | 0.409                      | 0.346                      |          |     |     | Pg |     |     | Chl |     |     |
| Pando Group  | 2         | PI A   | 0.399                      | 0.351                      |          |     |     |    | I/S |     | Chl |     |     |

APPENDIX 2  
 Yuso-Carrión

| Formation    | Area Code | SAMPLE | KI AD (°2θ)<br>AD standard | KI EG (°2θ)<br>EG standard | AI (°2θ) | Cld | Pri | Pg | I/S | Kln | Chl | C/V | Stp |
|--------------|-----------|--------|----------------------------|----------------------------|----------|-----|-----|----|-----|-----|-----|-----|-----|
| Devonian     | 3E        | PI 27  | 0.614                      | 0.448                      | 0.235    |     | PRL | Pg | I/S |     | Chl |     |     |
| Devonian     | 3E        | PI 28  | 0.577                      | 0.442                      | 0.290    |     | PRL | Pg | I/S |     | Chl |     |     |
| Devonian     | 3E        | PI 149 | 0.773                      | 0.651                      |          |     | Pri |    | I/S |     | Chl | C/V |     |
| Devonian     | 3E        | PI 319 | 0.726                      | 0.654                      |          |     |     |    | I/S | Kln |     |     |     |
| Devonian     | 3E        | PI 320 | 0.926                      | 0.899                      |          |     |     |    | I/S | Kln |     |     |     |
| Devonian     | 3E        | PI 321 | 0.802                      | 0.890                      |          |     |     |    | I/S | Kln |     | C/V |     |
| Devonian     | 3E        | PI 322 | 0.840                      | 0.956                      |          |     | Pri |    | I/S | Kln | Chl |     |     |
| Devonian     | 3E        | PI 324 | 0.729                      | 0.826                      |          |     | Pri |    | I/S | Kln | Chl |     | Stp |
| Devonian     | 3E        | PI 325 | 0.855                      | 0.854                      | 0.364    |     | Pri |    | I/S |     | Chl |     |     |
| Devonian     | 3E        | PI 326 | 0.618                      | 0.591                      | 0.326    |     |     |    | I/S |     | Chl |     |     |
| Devonian     | 3E        | PI 331 | 0.582                      | 0.608                      |          |     | Pri |    |     | Kln | Chl | C/V |     |
| Devonian     | 3E        | PI 332 | 0.882                      | 1.157                      | 0.319    |     |     |    | I/S |     | Chl |     |     |
| Devonian     | 3E        | PI 333 | 0.829                      | 0.835                      |          |     | PRL |    |     |     |     |     | Stp |
| Devonian     | 3E        | PI 353 | 0.796                      | 0.807                      |          |     |     | Pg |     | Kln |     |     | Stp |
| Silurian     | 3E        | PI 150 | 0.673                      | 0.713                      |          |     |     |    | I/S |     |     | C/V |     |
| Silurian     | 3E        | PI 327 | 0.786                      | 0.661                      | 0.291    |     | Pri |    | I/S |     | Chl |     |     |
| Silurian     | 3E        | PI 328 | 0.695                      | 0.835                      |          |     | Pri |    | I/S | Kln | Chl |     |     |
| Silurian     | 3E        | PI 352 | 0.698                      | 0.555                      | 0.317    |     | PRL |    | I/S |     | Chl |     | Stp |
| Silurian     | 3E        | PI 354 | 0.661                      | 0.584                      | 0.274    |     | Pri | Pg | I/S |     |     | C/V |     |
| Pando Group  | 3W        | PI 166 | 0.265                      | 0.271                      | 0.155    | Cld |     | Pg |     |     | Chl |     |     |
| Pando Group  | 3W        | PI 167 | 0.300                      | 0.284                      | 0.190    |     |     | Pg |     |     | Chl |     |     |
| Pando Group  | 3W        | PI 169 | 0.387                      | 0.381                      | 0.201    |     |     | Pg |     |     | Chl |     |     |
| Pando Group  | 3W        | PI 171 | 0.316                      |                            | 0.157    | Cld |     | Pg |     |     | Chl |     |     |
| Prioro Group | 3W        | PI 208 | 0.238                      | 0.255                      | 0.130    |     |     | Pg |     |     | Chl |     |     |
| Pando Group  | 3W        | PI 209 | 0.316                      | 0.335                      | 0.135    | CLD |     | Pg |     |     | Chl |     |     |
| Pando Group  | 3W        | PI 210 | 0.218                      | 0.225                      | 0.137    |     |     |    |     |     | Chl |     |     |
| Pando Group  | 3W        | PI 211 | 0.201                      | 0.203                      | 0.134    |     |     |    |     |     | Chl |     |     |
| Pando Group  | 3W        | PI 212 | 0.221                      | 0.233                      |          |     |     |    |     |     | Chl |     |     |
| Pando Group  | 3W        | PI 213 | 0.244                      | 0.250                      | 0.128    |     |     |    |     |     | Chl |     |     |
| Pando Group  | 3W        | PI 400 | 0.283                      | 0.294                      | 0.173    |     |     |    |     |     | Chl |     |     |
| Pando Group  | 3W        | PI 401 | 0.267                      | 0.240                      | 0.159    | Cld |     |    |     |     | Chl |     |     |
| Pando Group  | 3W        | PI 402 | 0.245                      | 0.217                      | 0.143    | Cld |     |    |     |     | Chl |     |     |
| Pando Group  | 3W        | PI 403 | 0.226                      | 0.229                      | 0.157    | Cld |     |    |     |     | Chl |     |     |
| Pando Group  | 3W        | PI 404 | 0.279                      | 0.267                      | 0.171    | Cld |     |    |     |     | Chl |     |     |
| Pando Group  | 3W        | PI 618 | 0.381                      | 0.394                      | 0.227    | Cld |     | Pg |     |     | Chl |     |     |
| Pando Group  | 3W        | PI 621 | 0.400                      | 0.409                      | 0.215    | Cld |     | Pg |     |     | Chl |     |     |
| Pando Group  | 3W        | PI 622 | 0.380                      | 0.389                      |          | Cld |     | Pg |     |     | Chl |     |     |
| Pando Group  | 3W        | PI 623 | 0.329                      | 0.326                      | 0.188    | Cld |     |    |     |     | Chl |     |     |
| Pando Group  | 3W        | PI 624 | 0.273                      | 0.265                      | 0.189    | Cld |     |    |     |     | Chl |     |     |
| Devonian     | 3W        | PI 619 | 0.272                      | 0.271                      |          | Cld |     |    |     |     | Chl |     |     |
| Devonian     | 3W        | PI 620 | 0.265                      | 0.275                      | 0.187    | Cld |     |    |     |     | Chl |     |     |

APPENDIX 2  
 Pisuegra

| Formation    | Area Code | SAMPLE | KI AD (°2θ)<br>AD standard | KI EG (°2θ)<br>EG standard | AI (°2θ) | Cld | Pri | Pg | I/S | Kln | Chl | C/V | Stp |
|--------------|-----------|--------|----------------------------|----------------------------|----------|-----|-----|----|-----|-----|-----|-----|-----|
| Viorna Group | 4E        | PI 114 | 0.752                      | 0.590                      |          |     |     |    | I/S | Kln |     |     |     |
| Viorna Group | 4E        | PI 115 | 0.602                      | 0.485                      |          |     |     |    | I/S | Kln | Chl |     | Stp |
| Viorna Group | 4E        | PI 116 | 0.434                      | 0.359                      |          |     |     |    | I/S | Kln | Chl |     |     |
| Viorna Group | 4E        | PI 117 | 0.544                      | 0.417                      |          |     |     |    | I/S | Kln |     | C/V |     |
| Viorna Group | 4E        | PI 120 | 0.490                      | 0.377                      |          |     |     |    | I/S |     | Chl |     |     |
| Viorna Group | 4E        | PI 121 | 0.684                      | 0.449                      |          | Cld |     |    | I/S | Kln |     |     |     |
| Viorna Group | 4E        | PI 122 | 0.403                      | 0.347                      |          | Cld |     |    | I/S | Kln | Chl | C/V | STP |
| Viorna Group | 4E        | PI 123 | 0.701                      | 0.445                      |          | Cld |     |    | I/S | Kln | Chl | C/V | Stp |
| Viorna Group | 4E        | PI 128 | 0.705                      | 0.524                      |          |     |     |    | I/S | Kln | Chl | C/V |     |
| Viorna Group | 4E        | PI 129 | 0.553                      | 0.366                      |          |     |     |    | I/S | Kln | Chl | C/V |     |
| Viorna Group | 4E        | PI 131 | 0.361                      | 0.348                      | 0.267    |     |     |    |     |     | Chl |     |     |
| Viorna Group | 4E        | PI 132 | 0.476                      | 0.420                      |          |     |     | Pg |     |     | Chl |     |     |
| Viorna Group | 4E        | PI 134 | 0.670                      | 0.565                      |          |     |     |    | I/S | Kln |     |     | STP |
| Viorna Group | 4E        | PI 135 | 0.431                      | 0.376                      |          | Cld | Pri |    | I/S | Kln |     |     | STP |
| Viorna Group | 4E        | PI 137 | 0.395                      | 0.359                      |          |     |     |    |     |     | Chl |     |     |
| Viorna Group | 4E        | PI 146 | 0.408                      | 0.342                      | 0.250    | Cld | Pri | Pg |     |     | Chl |     |     |
| Viorna Group | 4E        | PI 147 | 0.394                      | 0.341                      |          | Cld | Pri | Pg |     |     | Chl |     |     |
| Viorna Group | 4E        | PI 148 | 0.356                      | 0.317                      | 0.256    | Cld |     | Pg |     |     | Chl | C/V |     |
| Viorna Group | 4E        | PI 151 | 0.293                      | 0.286                      | 0.196    |     |     |    |     |     | Chl |     |     |
| Viorna Group | 4E        | PI 317 | 0.344                      | 0.317                      | 0.165    | Cld |     |    |     |     | Chl |     |     |
| Pando Group  | 4E        | PI 105 | 0.446                      | 0.372                      |          | Cld |     |    | I/S | Kln | Chl |     |     |
| Pando Group  | 4E        | PI 106 | 0.493                      | 0.394                      |          |     |     |    | I/S | Kln | Chl |     |     |
| Pando Group  | 4E        | PI 118 | 0.688                      | 0.484                      |          |     |     |    | I/S | Kln |     | C/V |     |
| Pando Group  | 4E        | PI 125 | 0.539                      | 0.373                      |          |     |     |    | I/S | Kln |     | C/V |     |
| Pando Group  | 4E        | PI 126 | 0.359                      | 0.336                      |          | Cld |     |    | I/S | Kln | Chl |     |     |
| Pando Group  | 4E        | PI 127 | 0.432                      | 0.359                      |          | Cld |     |    | I/S | Kln |     |     |     |
| Pando Group  | 4E        | PI 130 | 0.568                      | 0.383                      |          |     |     |    | I/S | Kln | Chl | C/V |     |
| Pando Group  | 4E        | PI 133 | 0.344                      | 0.319                      | 0.242    |     |     | Pg |     |     | Chl |     |     |
| Pando Group  | 4E        | PI 136 | 0.582                      | 0.482                      |          | Cld |     |    | I/S | Kln |     |     | Stp |
| Pando Group  | 4E        | PI 139 | 0.447                      | 0.382                      | 0.419    | Cld |     | Pg | I/S |     | Chl |     |     |
| Pando Group  | 4E        | PI 140 | 0.343                      | 0.344                      | 0.248    |     |     | Pg | I/S |     | Chl |     |     |
| Pando Group  | 4E        | PI 141 | 0.443                      | 0.408                      | 0.306    | Cld |     | Pg | I/S |     | Chl |     | Stp |
| Pando Group  | 4E        | PI 142 | 0.466                      | 0.410                      | 0.244    | Cld |     | Pg | I/S |     | Chl |     |     |
| Pando Group  | 4E        | PI 143 | 0.727                      | 0.697                      |          | Cld | Pri |    | I/S |     |     | C/V |     |
| Pando Group  | 4E        | PI 144 | 0.532                      | 0.418                      |          | Cld |     |    | I/S |     | Chl |     |     |
| Pando Group  | 4E        | PI 329 | 0.488                      | 0.451                      |          | Cld |     |    | I/S |     |     | C/V |     |
| Pando Group  | 4E        | PI 330 | 0.345                      | 0.375                      | 0.187    |     |     |    |     |     | Chl |     |     |
| Pando Group  | 4E        | PI 359 | 0.721                      | 0.719                      |          |     | Pri |    | I/S | Kln |     | C/V |     |
| Prioro Group | 4E        | PI 100 | 0.475                      | 0.366                      |          |     |     |    | I/S |     |     |     |     |
| Prioro Group | 4E        | PI 101 | 0.475                      | 0.318                      | 0.224    |     |     |    | I/S |     | Chl |     |     |
| Prioro Group | 4E        | PI 102 | 0.413                      | 0.306                      |          | Cld |     |    | I/S |     |     | C/V |     |
| Prioro Group | 4E        | PI 103 | 0.415                      | 0.296                      | 0.142    |     |     |    | I/S | Kln |     |     |     |
| Prioro Group | 4E        | PI 104 | 0.356                      | 0.306                      |          |     |     |    | I/S | Kln | Chl | C/V |     |
| Prioro Group | 4E        | PI 107 | 0.491                      | 0.404                      |          |     |     |    | I/S | Kln |     | C/V |     |
| Prioro Group | 4E        | PI 108 | 0.427                      | 0.348                      |          |     |     |    | I/S | Kln | Chl | C/V |     |
| Prioro Group | 4E        | PI 109 | 0.468                      | 0.366                      |          |     |     |    | I/S | Kln |     | C/V |     |
| Prioro Group | 4E        | PI 119 | 0.473                      | 0.358                      |          |     |     |    | I/S |     |     | C/V |     |
| Prioro Group | 4E        | PI 124 | 0.503                      | 0.348                      |          |     |     |    | I/S | Kln |     | C/V |     |
| Prioro Group | 4E        | PI 145 | 0.505                      | 0.458                      | 0.321    | Cld |     | Pg | I/S |     | Chl |     |     |
| Prioro Group | 4E        | PI 241 | 0.457                      | 0.467                      | 0.242    |     |     | Pg |     |     | Chl |     |     |
| Prioro Group | 4E        | PI 242 | 0.382                      | 0.384                      |          |     |     | Pg |     |     |     |     |     |
| Prioro Group | 4E        | PI 253 | 0.470                      | 0.464                      |          |     |     | Pg |     | Kln |     |     |     |
| Prioro Group | 4E        | PI 255 | 0.360                      | 0.348                      | 0.184    |     |     | Pg |     |     | Chl |     |     |
| Prioro Group | 4E        | PI 349 | 0.657                      | 0.656                      |          |     | Pri |    | I/S | Kln |     |     |     |

APPENDIX 2  
 Pisuegra

|              |    |        |       |       |       |     |     |     |     |
|--------------|----|--------|-------|-------|-------|-----|-----|-----|-----|
| Prioro Group | 4E | PI 350 | 0.576 | 0.611 |       | Pri | I/S | Kln | C/N |
| Prioro Group | 4E | PI 358 | 0.488 | 0.523 |       |     | I/S |     |     |
| Prioro Group | 4E | PI 360 | 0.430 | 0.427 | 0.416 |     | Pg  |     | Chl |
| Devonian     | 4E | PI 110 | 0.561 | 0.400 |       |     | I/S |     | C/N |
| Devonian     | 4E | PI 111 | 0.863 | 0.445 |       |     | I/S | Kln | C/N |
| Devonian     | 4E | PI 112 | 0.407 | 0.327 |       |     |     |     |     |
| Devonian     | 4E | PI 113 | 0.917 | 0.513 |       |     | I/S | Kln | Chl |
| Silurian     | 4E | PI 356 | 0.478 | 0.519 |       | Pri | I/S |     | C/N |
| Pando Group  | 4W | PI 226 | 0.410 | 0.348 |       |     | Pg  |     | Chl |
| Pando Group  | 4W | PI 227 | 0.281 | 0.265 | 0.127 | Cld | Pg  |     | Chl |
| Pando Group  | 4W | PI 228 | 0.224 | 0.226 |       |     |     |     |     |
| Pando Group  | 4W | PI 339 | 0.422 | 0.428 | 0.263 |     | Pg  |     | Chl |
| Pando Group  | 4W | PI 340 | 0.326 | 0.338 | 0.202 | Cld |     |     | Chl |
| Pando Group  | 4W | PI 351 | 0.367 | 0.355 | 0.166 | Cld |     |     | Chl |
| Pando Group  | 4W | PI 357 | 0.338 | 0.312 |       |     | Pg  |     | Chl |
| Prioro Group | 4W | PI 229 | 0.368 | 0.326 | 0.193 |     | Pg  |     | Chl |
| Prioro Group | 4W | PI 230 | 0.444 | 0.396 | 0.176 | Cld | Pg  |     | Chl |
| Prioro Group | 4W | PI 231 | 0.506 | 0.470 | 0.204 | Cld | Pg  |     | Chl |
| Prioro Group | 4W | PI 233 | 0.471 | 0.416 | 0.236 |     | Pg  |     | Chl |
| Prioro Group | 4W | PI 236 | 0.254 | 0.248 | 0.156 |     | Pg  |     | Chl |
| Prioro Group | 4W | PI 341 | 0.577 | 0.563 | 0.277 |     | Pg  |     | Chl |
| Prioro Group | 4W | PI 342 | 0.533 | 0.512 | 0.241 |     | Pg  |     | Chl |
| Prioro Group | 4W | PI 343 | 0.383 | 0.371 |       |     |     |     | Chl |
| Prioro Group | 4W | PI 344 | 0.435 | 0.482 | 0.260 |     | Pg  |     | Chl |
| Prioro Group | 4W | PI 345 | 0.470 | 0.499 |       |     | Pg  |     | Chl |
| Prioro Group | 4W | PI 346 | 0.434 | 0.439 |       |     | Pg  |     |     |
| Prioro Group | 4W | PI 347 | 0.504 | 0.502 | 0.306 |     |     |     | Chl |
| Prioro Group | 4W | PI 348 | 0.486 | 0.473 |       |     | Pg  |     | C/N |
| Silurian     | 4W | PI 355 | 0.555 | 0.595 |       | Pri | Pg  |     | Chl |

APPENDIX 2  
 Riaño-Cervera

| Formation    | Area Code | SAMPLE | KI AD (°2θ)<br>AD standard | KI EG (°2θ)<br>EG standard | AI (°2θ) | Cld | Prl | Pg | I/S | Kln | Chl | C/V | Stp |
|--------------|-----------|--------|----------------------------|----------------------------|----------|-----|-----|----|-----|-----|-----|-----|-----|
| Pando Group  | 5E        | PI 2   | 0.413                      | 0.347                      | 0.227    |     | Prl | Pg |     |     | Chl |     |     |
| Pando Group  | 5E        | PI 3   | 0.527                      | 0.498                      | 0.242    |     |     | Pg |     |     | Chl | C/V |     |
| Pando Group  | 5E        | PI 33  | 0.330                      | 0.330                      | 0.246    | Cld | Prl | Pg |     |     | Chl |     |     |
| Pando Group  | 5E        | PI 36  | 0.330                      | 0.338                      |          |     |     | Pg |     |     |     |     |     |
| Pando Group  | 5E        | PI 37  | 0.293                      | 0.306                      | 0.257    |     |     | Pg |     |     | Chl |     |     |
| Pando Group  | 5E        | PI 38  | 0.542                      | 0.719                      | 0.168    | Cld | PRL | Pg |     |     | Chl |     | Stp |
| Pando Group  | 5E        | PI 42  | 0.219                      | 0.216                      |          | Cld |     | Pg |     |     | Chl |     |     |
| Pando Group  | 5E        | PI 56  | 0.356                      | 0.336                      |          | Cld |     | Pg |     |     | Chl |     |     |
| Prioro Group | 5E        | PI 1   | 0.345                      | 0.323                      | 0.220    |     |     | Pg |     |     | Chl |     |     |
| Prioro Group | 5E        | PI 7   | 0.485                      | 0.480                      |          | Cld | Prl | Pg |     |     | Chl | C/V |     |
| Prioro Group | 5E        | PI 8   | 0.397                      | 0.394                      | 0.259    | Cld |     | Pg |     |     | Chl | C/V |     |
| Prioro Group | 5E        | PI 9   | 0.464                      | 0.446                      | 0.280    |     | Prl | Pg |     |     | Chl |     |     |
| Prioro Group | 5E        | PI 10  | 0.367                      | 0.352                      | 0.264    | Cld |     | Pg |     |     | Chl | C/V |     |
| Prioro Group | 5E        | PI 11  | 0.368                      | 0.368                      | 0.207    | Cld |     | Pg |     |     | Chl | C/V |     |
| Prioro Group | 5E        | PI 12  | 0.353                      | 0.343                      |          |     |     | Pg |     |     | Chl | C/V |     |
| Prioro Group | 5E        | PI 13  | 0.330                      | 0.321                      | 0.194    | Cld |     | Pg |     |     | Chl |     |     |
| Prioro Group | 5E        | PI 14  | 0.331                      | 0.326                      | 0.207    | Cld |     | Pg |     |     | Chl |     |     |
| Prioro Group | 5E        | PI 16  | 0.350                      | 0.348                      |          | Cld |     | Pg |     |     | Chl |     |     |
| Prioro Group | 5E        | PI 17  | 0.300                      | 0.304                      |          |     |     | Pg |     |     |     |     |     |
| Prioro Group | 5E        | PI 18  | 0.358                      | 0.314                      | 0.226    |     |     | Pg |     |     | Chl |     |     |
| Prioro Group | 5E        | PI 19  | 0.422                      | 0.349                      | 0.218    |     |     | Pg |     |     | Chl |     |     |
| Prioro Group | 5E        | PI 20  | 0.360                      | 0.345                      | 0.228    |     |     | Pg |     |     | Chl |     |     |
| Prioro Group | 5E        | PI 21  | 0.401                      | 0.413                      | 0.247    | Cld |     | Pg |     |     | Chl |     |     |
| Prioro Group | 5E        | PI 22  | 0.430                      | 0.402                      |          |     |     | Pg |     |     | Chl |     |     |
| Prioro Group | 5E        | PI 23  | 0.324                      | 0.323                      | 0.189    |     |     | Pg |     |     | Chl |     |     |
| Prioro Group | 5E        | PI 24  | 0.338                      | 0.327                      | 0.202    | Cld |     | Pg |     |     | Chl |     |     |
| Prioro Group | 5E        | PI 30  | 0.503                      | 0.373                      |          |     |     |    | I/S | Kln |     |     |     |
| Prioro Group | 5E        | PI 34  | 0.372                      | 0.364                      | 0.231    |     |     | Pg |     |     | Chl |     |     |
| Prioro Group | 5E        | PI 40  | 0.290                      | 0.290                      | 0.197    |     |     | Pg |     |     | Chl |     |     |
| Prioro Group | 5E        | PI 41  | 0.285                      | 0.293                      |          | Cld |     | Pg |     |     | Chl |     |     |
| Prioro Group | 5E        | PI 43  | 0.315                      | 0.303                      | 0.143    |     |     | Pg |     |     | Chl |     |     |
| Prioro Group | 5E        | PI 49  | 0.227                      | 0.230                      | 0.152    |     |     | Pg |     |     | Chl |     |     |
| Prioro Group | 5E        | PI 50  | 0.285                      | 0.278                      | 0.183    | Cld |     | Pg |     |     | Chl |     |     |
| Tour-Vis     | 5E        | PI 4   | 0.393                      | 0.366                      | 0.245    |     |     | Pg |     |     | Chl | C/V |     |
| Tour-Vis     | 5E        | PI 6   | 0.521                      | 0.440                      | 0.228    |     | Prl | Pg | I/S |     | Chl |     |     |
| Tour-Vis     | 5E        | PI 15  | 0.336                      | 0.341                      | 0.254    | Cld | Prl | Pg |     |     | Chl |     |     |
| Tour-Vis     | 5E        | PI 35  | 0.266                      | 0.262                      | 0.183    |     |     | Pg |     |     | Chl |     |     |
| Tour-Vis     | 5E        | PI 44  | 0.229                      | 0.219                      | 0.170    |     |     |    |     |     | Chl |     |     |
| Devonian     | 5E        | PI 5   | 0.376                      | 0.343                      |          |     | Prl | Pg |     |     | Chl |     |     |
| Devonian     | 5E        | PI 25  | 0.253                      | 0.227                      |          | Cld |     |    |     |     | Chl |     |     |
| Devonian     | 5E        | PI 31  | 0.330                      | 0.311                      | 0.205    |     | PRL | Pg |     |     | Chl |     |     |
| Devonian     | 5E        | PI 32  | 0.366                      | 0.384                      |          |     |     | Pg |     |     | Chl |     |     |
| Devonian     | 5E        | PI 39  | 0.441                      | 0.468                      |          |     |     | Pg |     |     |     |     |     |
| Devonian     | 5E        | PI 51  | 0.340                      | 0.340                      | 0.245    | Cld |     | Pg |     |     | Chl |     |     |
| Viorna Group | 5W        | PI 175 | 0.445                      | 0.359                      | 0.190    |     |     | Pg | I/S |     | Chl |     |     |
| Viorna Group | 5W        | PI 180 | 0.340                      | 0.312                      | 0.186    | Cld |     | Pg |     |     | Chl |     |     |

**APPENDIX 2**  
**Riaño-Cervera**

|              |    |        |              |              |              |     |     |     |
|--------------|----|--------|--------------|--------------|--------------|-----|-----|-----|
| Pando Group  | 5W | PI 173 | <b>0.499</b> | <b>0.395</b> |              | Pg  | I/S |     |
| Pando Group  | 5W | PI 176 | <b>0.443</b> | <b>0.356</b> | <b>0.202</b> | Pg  | I/S | Chl |
| Pando Group  | 5W | PI 178 | <b>0.408</b> | <b>0.369</b> |              | Pg  | I/S |     |
| Pando Group  | 5W | PI 179 | <b>0.426</b> | <b>0.370</b> |              | Pri | Pg  | I/S |
| Pando Group  | 5W | PI 181 | <b>0.345</b> | <b>0.301</b> | <b>0.134</b> | Pg  |     | Chl |
| Pando Group  | 5W | PI 182 | <b>0.359</b> | <b>0.282</b> | <b>0.195</b> | Pg  |     | Chl |
| Pando Group  | 5W | PI 183 | <b>0.286</b> | <b>0.289</b> | <b>0.198</b> | Pg  |     | Chl |
| Pando Group  | 5W | PI 184 | <b>0.328</b> | <b>0.318</b> | <b>0.178</b> | Pg  |     | Chl |
| Pando Group  | 5W | PI 186 | <b>0.322</b> | <b>0.311</b> | <b>0.149</b> | Pg  |     | Chl |
| Pando Group  | 5W | PI 190 | <b>0.301</b> | <b>0.300</b> | <b>0.206</b> |     |     | Chl |
| Pando Group  | 5W | PI 207 | <b>0.318</b> | <b>0.312</b> | <b>0.144</b> | Pg  |     | Chl |
| Prioro Group | 5W | PI 185 | <b>0.353</b> | <b>0.349</b> | <b>0.178</b> | Pg  |     | Chl |
| Prioro Group | 5W | PI 202 | <b>0.428</b> | <b>0.421</b> | <b>0.181</b> | Cld |     | Chl |
| Prioro Group | 5W | PI 613 | <i>0.423</i> | <i>0.435</i> | <b>0.231</b> | Cld |     | Chl |
| Prioro Group | 5W | PI 614 | <b>0.417</b> | <b>0.401</b> | <b>0.270</b> | Cld |     | Chl |
| Prioro Group | 5W | PI 616 | <b>0.400</b> | <b>0.382</b> | <b>0.209</b> | Cld |     | Chl |

**APPENDIX 2**  
**Riaño-Cervera**

|              |    |        |              |              |              |     |     |     |
|--------------|----|--------|--------------|--------------|--------------|-----|-----|-----|
| Pando Group  | 5W | PI 173 | <b>0.499</b> | <b>0.395</b> |              | Pg  | I/S |     |
| Pando Group  | 5W | PI 176 | <b>0.443</b> | <b>0.356</b> | <b>0.202</b> | Pg  | I/S | Chl |
| Pando Group  | 5W | PI 178 | <b>0.408</b> | <b>0.369</b> |              | Pg  | I/S |     |
| Pando Group  | 5W | PI 179 | <b>0.426</b> | <b>0.370</b> |              | Pri | Pg  | I/S |
| Pando Group  | 5W | PI 181 | <b>0.345</b> | <b>0.301</b> | <b>0.134</b> | Pg  |     | Chl |
| Pando Group  | 5W | PI 182 | <b>0.359</b> | <b>0.282</b> | <b>0.195</b> | Pg  |     | Chl |
| Pando Group  | 5W | PI 183 | <b>0.286</b> | <b>0.289</b> | <b>0.198</b> | Pg  |     | Chl |
| Pando Group  | 5W | PI 184 | <b>0.328</b> | <b>0.318</b> | <b>0.178</b> | Pg  |     | Chl |
| Pando Group  | 5W | PI 186 | <b>0.322</b> | <b>0.311</b> | <b>0.149</b> | Pg  |     | Chl |
| Pando Group  | 5W | PI 190 | <b>0.301</b> | <b>0.300</b> | <b>0.206</b> |     |     | Chl |
| Pando Group  | 5W | PI 207 | <b>0.318</b> | <b>0.312</b> | <b>0.144</b> | Pg  |     | Chl |
| Prioro Group | 5W | PI 185 | <b>0.353</b> | <b>0.349</b> | <b>0.178</b> | Pg  |     | Chl |
| Prioro Group | 5W | PI 202 | <b>0.428</b> | <b>0.421</b> | <b>0.181</b> | Cld |     | Chl |
| Prioro Group | 5W | PI 613 | <i>0.423</i> | <i>0.435</i> | <b>0.231</b> | Cld |     | Chl |
| Prioro Group | 5W | PI 614 | <b>0.417</b> | <b>0.401</b> | <b>0.270</b> | Cld |     | Chl |
| Prioro Group | 5W | PI 616 | <b>0.400</b> | <b>0.382</b> | <b>0.209</b> | Cld |     | Chl |

APPENDIX 2  
 Valsurbio

| Formation    | Area Code | SAMPLE | KI AD (°2θ)<br>AD standard | KI EG (°2θ)<br>EG standard | AI (°2θ) | Cld | Prl | Pg | I/S | Kln | Chl | C/V | Stp |
|--------------|-----------|--------|----------------------------|----------------------------|----------|-----|-----|----|-----|-----|-----|-----|-----|
| Viorna Group | 6         | PI 337 | 0.385                      | 0.375                      | 0.202    |     | Prl | Pg |     |     | Chl |     |     |
| Viorna Group | 6         | PI 338 | 0.647                      | 0.445                      | 0.206    |     | Prl | Pg | I/S |     | Chl |     |     |
| Pando Group  | 6         | PI 187 | 0.419                      | 0.354                      | 0.178    |     |     | Pg |     |     | Chl |     |     |
| Pando Group  | 6         | PI 188 | 0.286                      | 0.275                      | 0.169    | Cld |     | Pg |     |     | Chl |     |     |
| Pando Group  | 6         | PI 189 | 0.377                      | 0.351                      | 0.180    |     |     | Pg |     |     | Chl |     |     |
| Pando Group  | 6         | PI 192 | 0.390                      | 0.345                      | 0.229    |     |     |    |     |     | Chl |     |     |
| Pando Group  | 6         | PI 193 | 0.376                      | 0.313                      | 0.205    |     |     |    |     |     | Chl |     |     |
| Pando Group  | 6         | PI 194 | 0.347                      | 0.320                      | 0.153    |     |     | Pg |     |     | Chl |     |     |
| Pando Group  | 6         | PI 201 | 0.253                      | 0.265                      | 0.141    |     |     |    |     |     | Chl |     |     |
| Pando Group  | 6         | PI 203 | 0.417                      | 0.392                      |          | Cld | Prl | Pg |     |     |     |     |     |
| Pando Group  | 6         | PI 206 | 0.405                      | 0.387                      | 0.262    | Cld |     | Pg |     |     | Chl |     |     |
| Prioro Group | 6         | PI 204 | 0.459                      | 0.399                      |          |     |     | Pg |     |     | Chl |     |     |
| Prioro Group | 6         | PI 205 | 0.307                      | 0.298                      | 0.166    |     |     | Pg |     |     | Chl |     |     |
| Prioro Group | 6         | PI 615 | 0.531                      | 0.528                      |          |     |     |    | I/S |     |     |     |     |
| Tour-Vis     | 6         | PI 199 | 0.412                      | 0.375                      | 0.196    |     | Prl |    |     |     | Chl |     |     |
| Tour-Vis     | 6         | PI 335 | 0.343                      | 0.341                      | 0.202    |     |     | Pg |     |     | Chl |     |     |
| Devonian     | 6         | PI 52  | 0.202                      | 0.209                      | 0.196    | Cld |     |    |     |     | Chl | C/V |     |
| Devonian     | 6         | PI 53  | 0.195                      | 0.194                      | 0.147    |     |     |    |     |     | Chl |     |     |
| Devonian     | 6         | PI 54  | 0.271                      | 0.262                      | 0.190    | Cld |     | Pg |     |     | Chl |     |     |
| Devonian     | 6         | PI 59  | 0.333                      | 0.312                      |          | CLD |     | Pg |     |     | Chl |     |     |
| Devonian     | 6         | PI 60  | 0.233                      | 0.239                      | 0.15     | Cld |     | Pg |     |     | Chl |     |     |
| Devonian     | 6         | PI 61  | 0.286                      | 0.276                      |          | CLD |     | Pg |     |     | Chl |     |     |
| Devonian     | 6         | PI 62  | 0.255                      | 0.257                      |          | CLD |     |    |     |     | Chl |     |     |
| Devonian     | 6         | PI 64  | 0.236                      | 0.247                      |          | CLD |     |    |     |     | Chl |     |     |
| Devonian     | 6         | PI 66  | 0.202                      | 0.208                      | 0.158    | Cld |     |    |     |     | Chl |     |     |
| Devonian     | 6         | PI 67  | 0.206                      | 0.203                      | 0.141    |     |     |    |     |     | Chl |     |     |
| Devonian     | 6         | PI 68  | 0.348                      | 0.365                      | 0.207    | CLD |     | Pg |     |     | Chl |     |     |
| Devonian     | 6         | PI 69  | 0.248                      | 0.248                      | 0.152    | Cld |     | Pg |     |     | Chl |     |     |
| Devonian     | 6         | PI 71  | 0.287                      | 0.298                      | 0.152    | CLD |     | Pg |     |     | Chl |     |     |
| Devonian     | 6         | PI 72  | 0.266                      | 0.270                      | 0.166    | CLD |     | Pg |     |     | Chl |     |     |
| Devonian     | 6         | PI 336 | 0.351                      | 0.328                      |          | Cld | Prl |    |     |     |     |     |     |
| Devonian     | 6         | PI 617 | 0.274                      | 0.264                      | 0.208    | Cld |     |    |     |     | Chl |     |     |
