# Supplementary material for: Tectonothermal evolution in the core of an arcuate fold and thrust belt: the southeastern sector of the Cantabrian Zone (Variscan belt, NW Spain)
Source: Copernicus journal article supplement (doi:10.5194/se-2016-53), 2016-04-04
Supplement: Supplementary file [file se-2016-53-AC1-supplement.pdf]

# 1 **Tectonothermal evolution in the core of an arcuate fold and** 2 **thrust belt: the southeastern sector of the Cantabrian Zone** 3 **(Variscan belt, NW Spain)**

4 M. L. Valín, S. García-López, C. Brime, F. Bastida and J. Aller

5 Departamento de Geología, Universidad de Oviedo, 33005 Oviedo, Spain

6 *Correspondence to:* Fernando Bastida (bastida@geol.uniovi.es)

7 **Abstract.** The tectonothermal evolution of an area located in the core of the Ibero-Armorican arc (Variscan belt)  
8 has been determined by using the conodont color alteration index (CAI), Kübler index of illite (KI), the Árkai  
9 index of chlorite (AI), and the analysis of clay minerals and rock cleavage. The area is part of the Cantabrian  
10 Zone (CZ), which represents the foreland fold and thrust belt of the orogen. It has been thrust by several large  
11 units of the CZ, what resulted in the generation of a large amount of synorogenic Carboniferous sediments. CAI,  
12 KI and AI values show an irregular distribution of metamorphic grade, independent of stratigraphic position.  
13 Two tectonothermal events have been distinguished in the area. The first one, poorly defined, is mainly located  
14 in the northern part. It gave rise to very low-grade metamorphism in some areas and it was associated with a  
15 deformation event that resulted in the emplacement of the last large thrust unit and development of upright folds  
16 and associated cleavage ( $S_1$ ). The second tectonothermal event gave rise to low-grade metamorphism and  
17 cleavage ( $S_2$ ) crosscutting earlier upright folds in the central, western and southern parts of the study area. The  
18 event continued with the intrusion of small igneous rock bodies, which gave rise to contact metamorphism and  
19 hydrothermal alteration. The second event was linked to an extensional episode due to a gravitational instability  
20 at the end of the Variscan deformation. This tectonothermal evolution occurred during the Gzhelian-Sakmarian.  
21 Subsequently, several hydrothermal episodes took place, in association with local development of crenulation  
22 cleavage during the Alpine deformation.

## 23 **1 Introduction**

24 The Variscan belt defines an arc in the northwestern Iberian Peninsula (Ibero-Armorican Arc), whose core is  
25 formed by the Cantabrian Zone (CZ), which represents the foreland fold and thrust belt of the orogen (Fig. 1).  
26 This zone consists of Palaeozoic rocks in which two tectonostratigraphic units have been distinguished (Julivert,  
27 1978; Marcos and Pulgar, 1982), whose limit is approximately located by the Devonian-Carboniferous  
28 boundary. The preorogenic unit is formed of Cambrian to Devonian rocks consisting of alternating carbonate and  
29 siliciclastic formations; they form a wedge that thins towards the foreland. The synorogenic unit is formed by  
30 several clastic units, also thinning towards the foreland, which filled foredeep basins generated in the front of the  
31 main thrust units of the CZ. In this zone, the Variscan deformation occurred during the upper Carboniferous and  
32 gave rise to thin-skinned tectonics, with several large thrust units and associated folds (Fig. 1); the units were  
33 emplaced in a sequence towards the foreland. The deformation occurred under shallow crustal conditions, so that  
34 diagenetic conditions are dominant in the zone and absence of cleavage in the rocks is also dominant.  
35 Nevertheless, there are several areas of the CZ where cleavage and very low- or low-grade metamorphism are

36 present. One of these areas is the southeastern sector of the Cantabrian Zone. It is a foreland basin that occupies  
37 the core of the Ibero-Armorican Arc, and has undergone, a complex history of sedimentation, deformation,  
38 metamorphism, and to a lesser extent, magmatism.

39 The present study aims to present a model of tectonothermal evolution for the core of the Ibero-Armorican  
40 arc based on conodont colour alteration index (CAI), the Kübler index (KI) of illite, the Árkai index (AI) of  
41 chlorite, the analysis of clay minerals and the rock cleavage development.

## 42 **2 Geological setting**

43 The southeastern sector of the Cantabrian Zone is made up of two units: the Pisuerga-Carrión unit (PCU) and the  
44 Valsurbio unit (VU) (Fig. 1). As a consequence of its location in the core of the Ibero-Armorican arc, the PCU  
45 has been thrust over successively by the VU, the Central Coal Basin, the Ponga unit and the Picos de Europa  
46 unit, (Fig. 1). Thus, the PCU operated as a foreland basin during a great part of the history of the Variscan  
47 deformation. This history involved the accumulation of a great thickness of synorogenic Carboniferous  
48 sediments, corresponding to clastic wedges associated with the exhumation of the thrust units.

49 The VU is located to the south of the PCU. Marine facies occur in both units, but from the Emsian, the  
50 sediments in the latter unit were deposited in deeper waters than those in the former unit. The VU represents an  
51 extension of the southern part of the CZ, and **the Devonian succession of both is comparable** (Koopmans, 1962).  
52 The units **within the PCU** containing Silurian-Devonian rocks have been interpreted as transported from internal  
53 areas of the orogenic belt, specifically from the southeastern extension of the Westasturian-Leonese Zone,  
54 currently hidden under the Mesozoic-Cenozoic cover of the Duero basin, and located to the south of the VU  
55 (Frankenfeld, 1983; Marquínez and Marcos, 1984; Rodríguez Fernández and Heredia, 1987; Rodríguez  
56 Fernández, 1994). These units were named ‘Palentine nappes’ by Rodríguez Fernández and Heredia (1987). The  
57 PCU and the VU are separated by the León fault (also called ‘Ruesga fault’ in the study area) (Fig. 2), that  
58 **crosses** most of the Cantabrian Zone and whose meaning is controversial (Alonso et al., 2009 **and references**  
59 **therein**).

60 The oldest sediments of the study area are Silurian (Wenlock-Pridoli) sandstones and lutites. The Devonian  
61 rocks consist of an alternation of carbonate and siliciclastic formations with the facies differences cited above.  
62 Mississippian rocks are mainly limestones in the lower part, especially in the VU; upwards a mostly turbiditic  
63 sequences appears with common olistoliths in the northern sector and some carbonate levels. The Pennsylvanian  
64 succession is dominantly siliciclastic, with a thickness of several thousand meters and synorogenic character. In  
65 relation to this synorogenic sedimentation, several syntectonic unconformities have been described, among  
66 which the Curavacas unconformity (early Moscovian) can be highlighted by its structural significance (Van  
67 Veen, 1965; Lobato 1977; Alonso and Rodríguez Fernández, 1983; Martín-Merino et al., 2014).

68 The first deformation events were pre-Curavacas (prior to or earliest Moscovian) and involved the  
69 emplacement of the Palentine nappes and the VU. Two generations of thrusts **and folds associated with them**  
70 occurred during this episode (Rodríguez Fernández, 1994), which translated sequences northwards. Further,  
71 some back thrusts and normal faults occurred.

72 The post-Curavacas deformation events involved the development of several generations of thrusts and  
73 high-angle reverse faults, folds, cleavages and normal faults. Some thrusts have a trend approximately parallel to  
74 the basal thrust of the Ponga unit and are probably related to the emplacement of this thrust unit (Rodríguez

75 Fernández and Heredia, 1987), which occurred during the late Moscovian. In the same episode that involved the  
76 emplacement of the Picos de Europa thrust unit during the Kasimovian-Gzhelian (Merino-Tomé et al. 2009), N –  
77 S shortening occurred in the study area, involving the development of thrusts, high angle reverse faults and the  
78 reactivation of older faults with a movement dominantly southward (Maas, 1974). In addition, upright folds with  
79 E – W axial trace developed; among them, the Curavacas-Lechada syncline is remarkable for its notable  
80 dimensions (Savage, 1967; Lobato, 1977; Rodríguez Fernández, 1994).

81 Several cleavages have been recognised in the study area. Among them, a gently dipping cleavage  
82 crosscutting folds is the most relevant and has been described by various authors (Van Veen, 1965; Savage,  
83 1967; Lobato, 1977; Van der Pluijm et al., 1986; Rodríguez Fernández, 1994; Marín, 1997; García-López et al.,  
84 2007; among others).

85 A subsequent N-S shortening episode occurred during the Alpine deformation. It involved tightening of  
86 folds, local development of crenulation cleavage and reactivation of some faults. It is responsible for the dome  
87 geometry of the VU (Marín et al., 1995; Marín, 1997). Another post-Variscan structure of the study area is the  
88 Ventaniella fault, which traverses the whole Cantabrian Zone in a NW – SE direction. It is essentially a dextral,  
89 strike-slip fault with a net-slip of 4-5 km (Julivert et al., 1971) whose activity began in the Permian and  
90 continues to the present (López-Fernández et al., 2002, 2004).

91 Outcrops of intrusive igneous rocks are common in the PCU, and their knowledge is important to  
92 understand the tectonothermal evolution of this unit. Among these rocks, three granodioritic stocks (Pico Iján,  
93 Peña Prieta and Pico Jano; Fig. 2) and many small outcrops can be distinguished. The latter are mainly  
94 concentrated in the southern half of the unit.

95 The stocks of Pico Iján, Peña Prieta and Pico Jano dominantly have granodioritic composition and their  
96 intrusion was favoured by the existence of faults (Suárez and García, 1974; Corretgé and Suárez, 1990), having  
97 developed a notable aureole of contact metamorphism in the case of the Peña Prieta stock. The porphyroblasts in  
98 this aureole are post-tectonic relative to the gently dipping cleavage (Gallastegui et al., 1990; Rodríguez  
99 Fernández, 1994). The U/Pb age of the Peña Prieta granitoid is Cisuralian (292±2/-3 Ma after Valverde-Vaquero  
100 et al., 1999), and the Lower Triassic rocks appear in nonconformity on the Pico Iján granitoid. The large number  
101 of small outcrops of igneous rocks that exist in the southern half of the unit are concentrated in two areas (one in  
102 the eastern part and another in the western part) joined by a band whose outcrops of igneous rocks have been  
103 related to the León fault (Corretgé et al., 1987; Suárez and Corretgé, 1987; Corretgé and Suárez, 1990). All these  
104 southern outcrops have been in general related to fractures and appear as small stocks, probably apophyses of  
105 bigger bodies in depth, and as sills or dikes. Their composition is varied and ranges from granodioritic to  
106 gabbroic. In some cases, they developed ore bodies close to their contacts (Martín-Izard et al., 1986).

107 Earlier metamorphic studies in the Cantabrian zone using CAI and/or KI methods have shown the existence  
108 of areas with very low- or low-grade metamorphism in the PCU and the VU (Raven and van der Pluijm, 1986;  
109 Keller and Krumm, 1993; Marín et al., 1996; Marín, 1997; Köberle et al., 1998; García-López et al., 1999, 2007,  
110 2013; Bastida et al., 2002; Clauer and Weh, 2014; among others). Similar results have been obtained for the  
111 southern part of the study area using coal rank and vitrinite reflectance (Colmenero and Prado, 1993; Llorens et  
112 al., 2006; Colmenero et al., 2008; Clauer and Weh, 2014). This metamorphism has been described as associated  
113 with a late-orogenic extensional event and to the corresponding cleavage (García-López et al., 1999, 2007, 2013;  
114 Bastida et al., 2002). Analysis of ore deposits and of the tectonothermal evolution in the neighbouring unit of the

115 Picos de Europa has defined a subsequent hydrothermal episode during the Permian (Gómez-Fernández et al.,  
 116 1993, 2000; Bastida et al., 2004). Brime and Valín (2006) have suggested a hydrothermal origin for mineral  
 117 associations with chloritoid and pyrophyllite found in samples of pelitic rocks collected in the study area. K-Ar  
 118 dating of illite in samples collected in the southern part of the study area, identified four thermal episodes  
 119 (Clauer and Weh 2014), namely at: (1)  $293 \pm 3$  Ma (Cisuralian), (2)  $268 \pm 6$  Ma (Guadalupian), (3)  $243 \pm 5$  Ma  
 120 (middle Triassic), and (4)  $175 \pm 6$  Ma (early-middle Jurassic). From apatite fission tracks and zircon (U-Th)/He  
 121 ages in samples of Westphalian (Bashkirian-Moscovian) sandstones collected in the eastern part of the PCU,  
 122 Fillon et al. (2016) obtained ages of cooling below  $\approx 180^\circ\text{C}$  of 37-39 Ma and below  $\approx 110^\circ\text{C}$  of 28-29 Ma. They  
 123 inferred Cenozoic erosion of a rock thickness between 6.4 and 8 km (assuming a steady-state geothermal  
 124 gradient of  $25^\circ\text{C km}^{-1}$ ).

## 125 3 Methods

### 126 3.1 X-ray diffraction

127 A total of 297 mudrocks from various localities (Fig. 2) were studied by X-ray diffraction (XRD) analysis in  
 128 order to determine their phyllosilicate mineralogy, Kübler Index (KI) of illites, and Árkai Index of chlorites (AI).  
 129 Preparation of samples and methods for XRD analysis follow the methods described in Brime et al. (2003)

130 Reaction progress in illitic minerals (*sensu* Środoń 1984) has been widely used to assess the evolution of  
 131 pelitic lithologies during diagenesis and low-grade metamorphism. Prograde changes can be identified by use of  
 132 the Kübler Index technique (illite “crystallinity”, see Guggenheim et al. 2002) involving quantification of the  
 133 width of the  $10\text{Å}$  peak of illite. This is an indirect measure of lattice reorganization and thickening of illite  
 134 crystals (Kisch 1983; Merriman and Peacor 1999) with increasing grade. The Kübler Index (KI) is expressed in  
 135  $\Delta^\circ 2\theta$  to minimize variations caused by differences in recording conditions. For this study the KI was measured  
 136 using a laboratory procedure similar to that outlined by the IGCP 294 working group (Kisch, 1991). The  
 137 numerical KI value decreases with improving “crystallinity” and is expressed as small changes in the Bragg  
 138 angle  $\Delta^\circ 2\theta$ , using Cu  $K\alpha$  radiation.

139 The transient zone between diagenesis and metamorphism (the anchizone of Kübler, 1967) is defined by KI  
 140 values between  $0.42^\circ$  and  $0.25^\circ \Delta^\circ 2\theta$  respectively (Kisch, 1991). The values obtained in our laboratory were  
 141 correlated with the Kübler scale using a calibration curve based on data obtained from polished slate standards  
 142 kindly provided by H. Kisch. The diagenetic zone has been subdivided in shallow ( $\text{KI} > 1^\circ \Delta^\circ 2\theta$ ) and deep ( $1.0^\circ$   
 143  $> \text{KI} > 0.42^\circ \Delta^\circ 2\theta$ ), using the terms proposed by the IUGS Subcommittee on the Systematics of Metamorphic  
 144 rocks (Árkai et al., 2007). Following Merriman and Peacor (1999) we have divided the anchizone into low ( $0.42$   
 145  $< \text{KI} < 0.30^\circ \Delta^\circ 2\theta$ ) and high ( $0.30 < \text{KI} < 0.25^\circ \Delta^\circ 2\theta$ ).

146 Crystallinity index standards (CIS, Warr and Rice 1994) have also been used to compare the results thus  
 147 obtained with other published results using that scale. KI values obtained in this work could be converted to the  
 148 CIS scale by using the calibration equation:

$$149 \text{KI}_{\text{CIS}} = 1.505\text{KI}_{\text{this work}} - 0.046 \quad (R^2 = 0.996). \quad (1)$$

150 For the problems involved in the use of the CIS scale to assess metamorphic grade see Brime (1999) and  
 151 Kisch et al. (2005).

152 The KI method does not allow temperature constraints to be placed on the upper and lower boundaries of  
153 the anchizone and it is more likely to be a measure of reaction progress than of the thermodynamic equilibrium  
154 achieved (Essene and Peacor, 1995). However, this method, in combination with others such as fluid inclusions  
155 or reflectance of carbonaceous material, indicates that the transition diagenesis–anchizone could be correlated  
156 with a temperature of  $230 \pm 10$  °C whereas the limit anchizone–epizone would be at  $300 \pm 10$  °C (Müllis, 1979;  
157 Frey et al., 1980; Frey, 1987; Von Gosen et al., 1991; Müllis et al., 1995; Merriman and Frey, 1999; Ferreiro  
158 Mählmann et al. 2002; Müllis et al. 2002).

159 The presence of illite/smectite (I/S) and paragonite (Pg) and paragonite/muscovite (Pg/Ms) hampers  
160 determination of KI of many samples. However, pro-grade changes can also be identified by use of the Árkai  
161 Index technique (of chlorite “crystallinity”, see Guggenheim et al., 2002) involving quantification of the width of  
162 the 14Å or 7Å peaks of chlorite (Árkai, 1991, Meunier, 2005). The Árkai Index (AI) was determined in the (002)  
163 peak using the same instrumental conditions as that for KI measurements. The anchizone limits have been  
164 established using samples free of I/S, Pg-Pg/Ms in which the KI measured in the air dried samples has been  
165 calibrated with Kisch standards. The AI was measured in the same samples and the regression line obtained  
166 allowed the delimitation of the upper and lower anchizone limits using chlorite for AI values of 0.234 and 0.135  
167  $\Delta^{\circ}2\theta$  respectively. It should be noted that AI values are smaller than the corresponding KI and the method is  
168 therefore slightly less sensitive than KI method.

### 169 **3.2 Conodont colour alteration index (CAI).**

170 Colour changes in conodont elements are related to the progressive and irreversible alteration of the amounts of  
171 organic matter within their apatite composition. The CAI method is based on analysis of the colour changes that  
172 the conodonts undergo in response of the organic matter to a temperature increase with time. These changes  
173 permit construction of a scale of CAI values with eight units that allows the use of the conodonts as maximum  
174 paleothermometers for a temperature interval of between 50 and 600°C (Epstein et al., 1977; Rejebian et al.,  
175 1987). It is used mainly in carbonate rocks. Besides colour changes, apatite textural alteration also takes place  
176 and can provide complementary information about the thermal conditions. In the present paper the terminology  
177 of Rejebian et al. (1987) and García-López et al. (1997, 2006) is used for the textural description of conodonts.  
178 In agreement with Rejebian et al. (1987), well preserved conodonts and high CAI values with a wide dispersion  
179 are indicative of contact metamorphism. Furthermore, coarse recrystallization and corrosion are related to  
180 hydrothermal processes.

181 Samples were collected from the Pisuerga-Carrión and Valsurbio units. CAI values are based on 5 kg  
182 samples of limestone that were treated, with 6% acetic acid solution. Unfortunately, recovery of conodonts from  
183 Carboniferous rocks was hindered in some areas by their dominantly siliciclastic character. Sampling was  
184 complemented with specimens from collections housed at the University of Oviedo (Spain) and those of the  
185 National Museum of Natural History at Leiden (Netherlands) and Institut und Museum für Geologie und  
186 Paläontologie in Göttingen (Germany) (Fig. 2). 213 positive samples, corresponding to an age interval from the  
187 Pridoli to Ghzelian, were analyzed for CAI determination (Appendix 1 in the supplementary material).

188 The methodology involved in CAI determination can be found in García-López et al. (1997) and Bastida et  
189 al. (1999). Several CAI values were obtained from most samples and the mean of CAI values have been  
190 determined for each of them in order to tentatively contour CAI values. Samples with a range higher than 1.5

191 have not been used to obtain mean CAI values and temperatures. The interpretation of the results is mainly based  
192 on the analysis of the CAI isograds and their relationship to the stratigraphic contacts and the main structures of  
193 the study area.

194 For the metamorphic zonation from CAI data, we use the terminology described by García-López et al.  
195 (2001), that involves a division in diacaizone ( $CAI < 4$ ), ancaizone ( $4 \leq CAI \leq 5.5$ ) and epicaizone ( $CAI > 5.5$ ).

196 Temperature ranges of the CAI values were obtained from the Arrhenius plot presented by Epstein et al.  
197 (1977) and Rejebian et al. (1987). The maximum possible heating time is the age of the rock. Nevertheless, it is  
198 possible to place greater limits on this maximum time (García-López et al., 2013). According to the Arrhenius  
199 plot a minimum temperature is required to obtain a specific CAI value. For example, in a rock with an age of 400  
200 Ma (Devonian), development of  $CAI = 5$  requires at least  $290^{\circ}\text{C}$  (point A in Fig. 3). Then, it can be assumed that  
201 a temperature  $< 290^{\circ}\text{C}$  does not contribute to generate a  $CAI = 5$ . Hence, to produce a given CAI, the maximum  
202 time of heating begins when the rock reaches the minimum temperature necessary to produce that CAI, and it  
203 ends when the rock cools down and the temperature becomes lower than this minimum value. **Although the**  
204 **heating time can be slightly different depending on the geological location of the samples,** we consider that the  
205 main heating time corresponds to a late-Variscan period that began at the boundary Kasimovian-Gzhelian and  
206 ended at the beginning of the Triassic (heating time of about 50 Ma); **this is made in agreement with the age of**  
207 **the metamorphism analyzed below and the igneous rocks.** The hydrothermal post-Variscan episodes described  
208 by Clauer and Weh (2014) and the Alpine heating (mainly Cenozoic) analyzed by Fillon et al. (2016) **probably**  
209 **involved lower temperatures than those reached in the late-Variscan event, in which magmatism and cleavage**  
210 **development are more intense. It must be taken into account that in** rocks undergoing more than one heating  
211 period, the period to be considered for the development of the CAI is the one which generated higher  
212 temperatures. Anyway, due to the geometry of the CAI curves in the Arrhenius plot, for heating intervals such as  
213 those involved in the present case, an error of a few Ma in the maximum time of heating has little influence on  
214 the results. According to Patrick et al. (1985) and Rejebian et al. (1987) the minimum time of heating assumed  
215 here is of 1 Ma.

### 216 3.3 Cleavage

217 Development of cleavage requires mineralogical and **also microstructural changes due to ductile deformation,**  
218 involving mechanisms, such as pressure solution, which require a minimum temperature of about  $200^{\circ}\text{C}$  for  
219 cleavage development in pelitic rocks and  $175^{\circ}\text{C}$  in limestones (Groshong et al. 1984). Thus widespread  
220 presence of cleavage occurs below a certain crustal level (minimum overburden of 5-7 km; Engelder and  
221 Marshak, 1985). Furthermore, the relations between folds and cleavages and the overprinting relations between  
222 cleavages, play an important role in defining deformation events (Passchier and Trouw, 2005). In addition,  
223 cleavage is also a key structure to establish chronological relations between metamorphic crystallization and  
224 deformation.

225 In the context of the study area, we call tectonothermal event to a deformational event with cleavage  
226 development and associated metamorphic conditions, and use the term thermal event for metamorphic conditions  
227 without cleavage development. Hence, cleavage is considered here as the main reference to ascertain the  
228 tectonothermal events of the study area.

## 229 4 Results and interpretation

230 In order to facilitate description, the samples have been **mainly** grouped in the following areas, namely Liébana,  
231 Valdeón, Yuso-Carrión, Pisuerga, Riaño-Cervera and Valsurbio (Fig. 4) (cf. Martín-Merino et al., 2014).

### 232 4.1 Clay minerals

#### 233 4.1.1 Clay mineral assemblages

234 Mineralogical analysis of the <2 µm fractions shows that dioctahedral K- rich mica-like structures (referred to as  
235 illite or muscovite, I-Ms) is present in all the samples with the majority containing also chlorite (Chl) (Fig. 5).  
236 Chlorites have poorly developed 14 Å peaks, indicating high iron content suggestive of chamositic compositions  
237 (Moore and Reynolds, 1997). Other phases such as ordered illite/smectite (I/S) or paragonite (Pg) and mixed  
238 layers paragonite/muscovite (Pg/Ms) are also common. Asymmetry of peaks and sample behaviour after  
239 glycolation indicate the presence of ordered illite/smectite (I/S). Absence of random I/S indicate that zone 3 of  
240 Eberl (1993) has been reached, suggesting that temperatures exceeded 100°C. Kaolinite (Kln) and pyrophyllite  
241 (Prl) may also be present in some samples and are abundant in a few samples. In addition, chloritoid (Cld) is also  
242 present and widespread in the study area. However it is more abundant in samples close to the intrusions and/or  
243 faults in which case is found together with chlorite and Pg + Pg/Ms. Only in samples to the E (Pisuerga Area),  
244 where it is not as abundant, it may be associated with Prl, Kln or I/S. Finally chlorite/vermiculite mixed  
245 layer (C/V) and stilpnomelane (Stp) have been found, in small amounts, in a few samples, and are restricted to  
246 samples to the E Pisuerga and E Yuso-Carrión areas.

247 The I/S is more abundant to the N and E (Valdeón, Liébana, and eastern part of the Pisuerga and Yuso-  
248 Carrión areas) and Kln presence is almost restricted to samples to the E (Pisuerga and eastern part of the Yuso-  
249 Carrión areas). Prl is common in samples from the central and northeastern parts (Liébana and Pisuerga areas,  
250 and eastern part of the Yuso Carrión area) (Fig. 5). Quartz, calcite, feldspars and goethite were accessory phases  
251 recognized in some samples.

252 In general the assemblages found are, in order of abundance of the most frequent phase besides illite (n =  
253 291):

254 I + **Chl** (n = 215) ± Pg ± Pg/Ms ± Cld ± I/S ± [C/V] ± [Prl] ± [Kln] ± [Stp]

255 I + **Pg + Pg/Ms** (n = 162) ± Chl ± Cld ± [I/S] ± [Prl] ± [C/V] ± [Kln] ± [Stp]

256 I + **I/S** (n = 112) ± Chl ± Kln ± Prl ± C/V ± Pg ± Pg/Ms ± C/V ± [Cld] ± [Stp]

257 I + **Cld** (n = 93) ± Chl ± Pg ± Pg/Ms ± I/S ± [C/V] ± [Prl] ± [Kln] ± [Stp]

258 I + **Prl** (n = 56) ± I/S ± Chl ± Pg ± Pg/Ms ± C/V ± [Cld] ± [Kln] ± [Stp]

259 I + **C/V** (n = 48) ± I/S ± Chl ± Pg ± Pg/Ms ± Kln ± Prl ± Cld ± [Stp]

260 I + **Kln** (n = 39) ± I/S ± Chl ± C/V ± [Prl] ± [Cld] ± [Pg] ± [Pg/Ms] ± [Stp]

#### 261 4.1.2 Kübler Index

262 As mentioned above, determination of KI has been hampered by the presence in some samples of certain types  
263 of I/S and big amounts of Pg or Prl, in relation to the amount of illite, that interfere with the 001 peak of illite,

264 therefore rendering their KI values useless for grade determination using KI, even in the glycolated state. As a  
 265 result, 23 (indicated in *italics* in Appendix 2 in the supplementary material) of the 291 samples studied yielded  
 266 doubtful KI values (Figs. 6, 7; Appendix 2 in the supplementary material). They are **included**, nevertheless, as  
 267 they indicate maximum value of the KI.

268 Grade ranges from deep diagenetic to epizonal, but deep diagenetic and mainly low anchizonal metapelites  
 269 are predominant in most of the areas (Figs. 6 and 7). Expandability of the 10 Å peak is only lost at the high  
 270 anchizone to epizone boundary. Deep diagenetic areas can be found to the north (Liébana and Valdeón areas).  
 271 The Riaño-Cervera area is mainly low anchizonal with a few samples being diagenetic or deep anchizonal. In the  
 272 Pisuegra area, the grade ranges from deep diagenetic to low anchizonal (Figs. 6, 7). Higher grade (epizonal)  
 273 samples may appear in any formation and they are more abundant in the western part of the Yuso-Carrión area,  
 274 where a big size intrusion is located, and in the Devonian of the Valsurbio area (Fig.7). In both cases, it is in  
 275 those high grade samples where chloritoid is more abundant (Fig.6).

276 Work in progress on the variation of the chemical composition of the phyllosilicates of the study area  
 277 allowed estimation of temperatures using Battaglia's (2004) approach based in the variation in the chemical  
 278 composition of illites. Temperatures obtained are in the range 230-280°C, consistent with the anchizonal KI  
 279 values of the analyzed samples. The observed deficit in layer charge (Brime and Valín, 2006) is characteristic of  
 280 anchizonal K white micas (Hunziker et al 1986; Livi et al. 1997; Merriman and Peacor 1999; Árkai 2002; Árkai  
 281 et al 2003).

#### 282 4.1.3 Árkai Index

283 **The Árkai Index** has been measured in 118 samples, most if not all of them, containing various amounts of I/S  
 284 and/or Pg, Pg/Ms. Of them, 40 yielded diagenetic values, 63 low anchizonal values, 14 high anchizonal values  
 285 and just one epizonal value. Distribution of these values can be seen in Fig. 6. In those cases in which KI and AI  
 286 have been determined, the correlation of the grade indicated by both **indexes** is good ( $r = 0.65$ ; significance level  
 287 0.1%  $r_{60} = 0.41$ ) suggesting that both phases were formed under the same conditions, and supporting the  
 288 reliability of the AI as indicator of grade in those cases in which it is the only index available (Árkai et al., 1995).

289 The existence of some discrepancies between KI and AI may be caused by the presence of small amounts  
 290 of I/S or Pg that alters the width of the illite peaks. However, those discrepancies are always small and are  
 291 usually in samples at the boundary between metamorphic grade zones (Appendix 2 in the supplementary  
 292 material).

#### 293 4.1.4 Mineral distribution in relation with grade

294 Kaolinite is present in deep diagenetic samples and also in some low anchizonal ones. Maximum **stability**  
 295 **temperature** of Kln is 270°C, according to laboratory experiments (Velde, 1992) and therefore in agreement with  
 296 its presence in the anchizonal samples. Paragonite, apart from its presence in deep diagenetic samples, is more  
 297 frequently present in the anchizone and some epizonal samples (Figs. 5 and 6). Pyrophyllite is more abundant in  
 298 samples from the anchizone but it can also be present in diagenetic samples.

299 The widespread occurrence of Kln and quartz in the diagenetic rock samples may provide the starting  
 300 material for the formation of Prl by the reaction

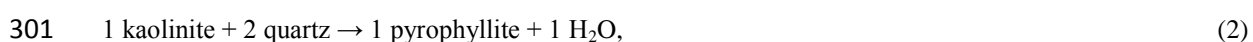



302 as suggested in the Glarus Alps by Frey (1978), who considered Prl an indicator of anchizone regional  
 303 conditions. In fact of the 53 samples in which Prl is present, Kln is found, and in very small amounts, in only 8  
 304 of them. However, the stability field of Prl is strongly influenced by water activity, and thus the formation  
 305 temperature could be notably lower (Thompson, 1970; Winkler, 1979; Hemley et al., 1980). Its presence in  
 306 diagenetic samples is not uncommon and could be due to the influence of magmatic fluids (Hosterman et al., 1970;  
 307 Kisch, 1987). According to Kisch (1987) Prl, appears in regional terrains only in the anchizone but in areas of  
 308 intrusive activity it may appear in lower grade zones. Therefore presence of Prl in samples with diagenetic KI/Al  
 309 values, as in the eastern part of the Liébana and Yuso Carrión areas, could be regarded as evidence for high  
 310 geothermal gradients or magmatic heating.

311 Chloritoid is abundant in samples from the high anchizone to epizone (southeastern Valsurbio area and  
 312 western Yuso Carrión area), but it can also be present, in smaller amounts, in low anchizone (1, 3W, 4E, 4W,  
 313 5E, 5W) and even diagenetic samples (eastern Liébana, Pisuerga and Riaño-Cervera areas). Cld is Fe rich. The  
 314 average Mg/(Fe+Mg) found is < 0.12 (Brime and Valín, 2006) similar to that of pelites subjected to intermediate  
 315 *P/T* conditions. It is noteworthy that when this phase is present in the samples (a total of 93 samples have Cld),  
 316 Prl is absent, or in very minor amounts in a few samples (ten in total), indicating that it could have been formed  
 317 according to the reaction originally proposed by Zen (1960), which is generally accepted for the formation of  
 318 Cld during metamorphism of aluminous pelites (Theye et al. 1992):

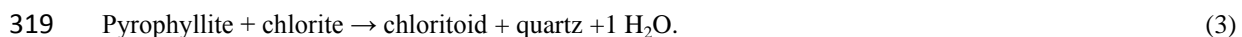

320 The absence of Cld in the eastern part of the Yuso Carrión area where Prl is abundant, together with Chl,  
 321 could indicate that the temperature required for its formation by reaction (3) has not been reached.

322 Presence of some Fe oxides has been detected in samples from the study area. Therefore more Cld could be  
 323 produced by the reaction suggested by Bucher and Frey (1994):

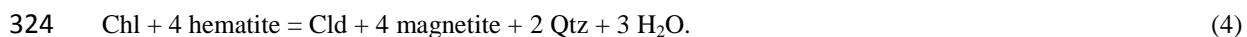

325 However, it has been observed in thin sections that occurrence of Prl is almost restricted to veins and  
 326 fracture zones, suggesting that Cld could have been formed during the hydrothermal alteration of the pelites  
 327 following the reaction proposed by Phillips (1988):

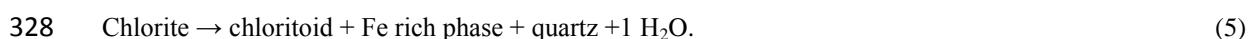

329 Presence of Cld in the anchizone has been discussed by Kisch (1983), who concluded that Cld cannot  
 330 unequivocally be regarded as an indicator of the beginning of the epizone, as previously suggested, because there  
 331 are occurrences in the anchizone (Árkai et al., 1981). In the study area, Cld is more abundant in the epizonal  
 332 samples of the Valsurbio (6) and W Yuso-Carrion (3W) areas, but it is also present in low anchizone and a few  
 333 deep diagenetic samples from the Riaño Cervera (5E), Pisuerga (4E) or Valdeón (2) areas, thus corroborating the  
 334 conclusion of Kisch (1983).

335 Chloritoid and Prl are widespread in virtually all rock types and grade conditions (Appendix 2 in the  
 336 supplementary material). This occurrence could be related to basin wide alteration by infiltrating hydrothermal  
 337 fluids (Phillips, 1988; Brime and Valín, 2006). Late to post Variscan fluid flow events have been described in the  
 338 other areas of the Cantabrian Zone (Ayllón et al., 2003; Gasparrini et al., 2003) and related to a more general  
 339 Variscan event (Boni et al., 2000).

## 340 4.2 Conodont colour alteration index (CAI).

341 The CAI values are independent of the stratigraphic position of the samples (Fig. 8). These values vary widely,  
 342 ranging from 1.5 to 7.5, corresponding respectively to intervals of temperatures of < 40-60°C and 550-590°C  
 343 (see Appendix 1 in the supplementary material). However, values equal to or lower than 2 are unusual, being  
 344 limited to the southeastern sector of the Pisuerga-Carrión unit. Some samples with conodonts having high CAI  
 345 values and a range of one and a half units, or more, are indicative of contact metamorphism and/or hydrothermal  
 346 processes. Values  $\geq 6$  are usually found close to outcrops of igneous rocks. The upper boundary of the ancaizone  
 347 (CAI = 4) corresponds to a temperature range of 190 - 225°C, while the lower limit (CAI = 5.5) corresponds to  
 348 the range of 340-375°C.

349 The lack of carbonate rocks prevents in some areas the construction of a complete map of CAI isograds;  
 350 however, it is possible to observe that they crosscut the trend of the Variscan structures. CAI data allow the  
 351 distinguishing of the following sectors in the study area (Fig. 8):

- 352 (a) Northern sector (Liébana and Valdeón areas). This is an ancaizonal area that passes without thermal  
 353 discontinuity through the basal thrust of the Picos de Europa unit. Inside this unit, the boundary  
 354 ancaizone/diacaizone appears and the CAI decreases northwards (Bastida et al., 2004; Blanco-Ferrera et al.,  
 355 2011).
- 356 (b) Central-eastern sector (eastern part of the Yuso-Carrión area) with dominance of ancaizonal conditions. Here,  
 357 in the areas where CAI data exist, a remarkable homogeneity of CAI values appears, mainly in the Devonian  
 358 rocks of the area located to the east of the Curavacas-Lechada syncline.
- 359 (c) Central and western sectors, (western part of the Yuso-Carrión and Riaño-Cervera areas) where the limited  
 360 CAI data available indicate that epicaizonal areas coexist with ancaizonal areas.
- 361 (d) Southern sector. It corresponds to the VU and presents a wide area with epicaizonal conditions (García-  
 362 López et al., 2013).
- 363 (e) Southeastern sector (eastern part of the Yuso-Carrión and Pisuerga areas). In this area, diacaizonal  
 364 conditions are dominant, but ancaizonal and epicaizonal areas also appear. The latter areas appear adjacent  
 365 to outcrops of igneous rocks. The greater variation of CAI values is found in this area, with a range from 1.5  
 366 to 7.

367 The apparently chaotic distribution of CAI isograds is probably due to a heat from subsurface intrusions at  
 368 depth resulting in isotherms having complex geometry. This pattern may be related to a crustal thinning during  
 369 an extensional episode and to the subsequent intrusion of igneous bodies that emplaced at different levels,  
 370 generating contact metamorphism and hydrothermal fluids.

371 In general, conodonts of the study area are undeformed and well preserved. Most of them have granular  
 372 texture due to apatite recrystallization under high temperature. The apatite crystals do not show preferential  
 373 orientation and their size increases with temperature. The granular texture is commonly incipient for CAI values  
 374 between 4 and 4.5 and is widespread for CAI values  $\geq 5$ . Furthermore some conodonts with CAI values between  
 375 6 and 7 have coarse recrystallization, corrosion and loss of ornamentation, so that in a few cases they have lost  
 376 their original morphology ("ghost conodonts"). These alterations of conodonts with CAI values  $\geq 5$  are  
 377 indicative of contact metamorphism and hydrothermal processes. Some conodonts with CAI  $\geq 4.5$  present sets of  
 378 parallel microfissures, probably related to the rock cleavage. Conodonts with CAI  $\leq 4$  have occasionally  
 379 unaltered surfaces, but most of them present a sugary texture (dull, frosted or pitted surfaces). The surfaces of

380 these conodonts show several types of overgrowth of apatite crystals, mainly developed independently of the  
381 CAI value (or thermal changes under diacaizonal conditions); they were usually a result of apatite solution and  
382 crystallization processes (Blanco-Ferrera et al., 2011).

### 383 4.3 Cleavage development and tectonothermal events

384 Two main cleavages have been found in the study area (Fig. 9). Cleavage  $S_1$  is a rough foliation associated with  
385 upright folds and trends approximately E-W; it appears mainly in the northern half of the study area. This  
386 cleavage affects latest Carboniferous rocks (Kasimovian-Gzhelian age). Cleavage  $S_2$  dips gently, crosscuts  
387 earlier upright folds and is associated with the development of meter-scale open cascade folds. It is especially  
388 well developed in the Curavacas-Lechada syncline and in the VU. Both cleavages appear in different areas and  
389 have not been observed superimposed. The existence of two cleavages with different age suggests that two  
390 tectonothermal events took place in the southeastern sector of the CZ.

391 The first event, associated with the  $S_1$  cleavage (sub-vertical), is not well defined, since it developed in an  
392 area where presence of I/S and Kln and KI and AI values indicate deep diagenesis or low anchizonal conditions,  
393 and CAI values dominantly show ancaizonal conditions. According to the age of the latest rocks affected, this  
394 event probably occurred during the late Gzhelian. It resulted in crustal thickening produced by the N - S  
395 shortening that gave rise to the emplacement of the Picos de Europa unit, the last major Variscan thrust unit that  
396 was generated in the foreland fold and thrust belt, and it disassociated with the development of other thrusts and  
397 folds to the south of this unit.

398 The second event produced cleavage  $S_2$  that crosscuts the upright folds in the southern part of the study  
399 area (Curavacas-Lechada syncline and the VU). Under the microscope, this cleavage shows evidences of  
400 pressure solution and crystallization of oriented muscovite and chlorite with formation of chlorite-muscovite  
401 porphyroblasts. X-ray diffraction indicates that the rocks affected by this cleavage present Chl + Pg-Pg/Ms  
402 assemblages; KI and AI values indicate high anchizonal to epizonal conditions and CAI values indicate similar  
403 conditions. The gently dipping attitude of  $S_2$  suggests that this event was associated with an extensional  
404 deformation and the corresponding crustal thinning as a consequence of a late orogenic gravitational  
405 readjustment of the orogen in the core of the Ibero-Armorican arc. This interpretation agrees with the kinematic  
406 evolution of the arc proposed by Gutiérrez-Alonso et al. (2004, 2011). The event culminated with the intrusion  
407 of igneous rocks that **pierced** the rocks with cleavage and generated a contact metamorphism associated with  
408 hydrothermal processes, as indicated by: (1) the widespread presence of Cld and Prl (Fig 5; Brime and Valín,  
409 2006) and low KI and AI values, (2) recrystallization in conodonts (granular texture), (3) high CAI values in  
410 samples close to outcrops of intrusive rocks, (4) wide range of CAI in some samples, and (5) irregular variation  
411 of the CAI through the area and strong corrosion in some conodonts. The cleavage  $S_2$  developed earlier than the  
412 porphyroblasts (biotite, andalusite and chloritoid) formed during the contact metamorphism associated with the  
413 granodioritic stock of Peña Prieta (Gallastegui et al., 1990; Rodríguez Fernández, 1994), whose age is Cisuralian  
414 (292+2/-3 Ma after Valverde-Vaquero et al., 1999). These data suggest the development of a thermal event that  
415 took place near the boundary Carboniferous-Permian and that progressed during the Cisuralian with the intrusion  
416 of many small igneous bodies that rose along faults (Suárez and García, 1974; Corretgé and Suárez, 1990).

417 In some locations,  $S_2$  is gently folded with local development of crenulation cleavage. This may be a result  
418 of the Alpine deformation, which is the only post-Variscan compressional deformation described in the area

419 (Gallastegui, 2000 and references therein), and involves a ductile deformation that required a moderate  
420 temperature and gave rise to a dome shape in the Valsurbio unit (Marín, 1997).

421 The features described above refer to late-Variscan events related to the development of penetrative  
422 structures or to the intrusion of igneous rocks. However, the existence of such events does not preclude the  
423 development of others subsequently, such as the hydrothermal post-Variscan episodes described by Boni et al.  
424 (2000), Muchez et al. (2005), Gasparrini et al. (2006) and Clauer and Weh (2014).

## 425 **5 Discussion**

426 The distribution of the different grade indicators used in the study area shows, in general, an acceptable  
427 correlation between them, although some discrepancies have been observed. All methods coincide in pointing  
428 out the location of the areas with higher metamorphic grade, being the CAI and the AI the indicators that tend to  
429 give the highest and the lowest grade respectively. All indices point to an irregular distribution of the areas with  
430 very low-grade metamorphism. Diacaizonal areas are limited to the southeastern sector. A discrepancy is  
431 observed in the eastern Yuso-Carrión area between clay mineral and CAI data. A notable number of CAI values  
432 systematically indicate ancaizonal conditions, whereas clay assemblages with abundant I/S and Kln, KI and AI  
433 indicate diagenetic conditions.

434 The correlation among the different indicators that can be used to establish the metamorphic grade is  
435 challenging due to several factors, such as the different kinetics of the processes that modify the colour of the  
436 conodonts and the transformation of the clay minerals and the different influence of fluids in limestones and  
437 pelitic rocks. These processes could explain the discrepancies observed.

438 In the context of the Cantabrian Zone, the low-grade extensional metamorphism of the PCU extends  
439 westwards and allows an elongated area to be defined that can be followed up to the Central Coal Basin (Fig. 1)  
440 (Aller, 1981, 1986; Brime, 1985; Aller et al., 1987, 2005; García-López et al., 2007). The biggest width of this  
441 zone is in the study area, coinciding with the core of the Ibero-Armorican arc. In the Central Coal Basin, this  
442 metamorphism is linked to the occurrence of cleavage associated with crosscutting folds and it has been related  
443 to the possible existence of igneous bodies in depth (Aller, 1986) or to the rise of fluids along faults, especially  
444 the León fault (Aller et al., 2005). In the metamorphic southern part of the study area (VU), the metamorphism  
445 disappears westward, so that the adjacent western unit of the Esla nappe region is not metamorphic (García-  
446 López et al., 2013; Valín and Brime unpublished data).

447 The existence of hydrothermal alteration has been suggested by Brime and Valín (2006) and Clauer and  
448 Weh (2014). The common occurrence of Cld and Prl and the irregular distribution of CAI values, the wide range  
449 in the high CAI values in some samples and textural alterations of conodonts agree with the occurrence of  
450 hydrothermal fluids and possible subsurface igneous bodies. As for the thermal events dated by Clauer and Weh  
451 (illite K-Ar; 2014), the first has an age ( $293 \pm 3$  Ma), comparable to that of the Peña Prieta **granitoid**, and the  
452 others (Guadalupian, middle Triassic and early-middle Jurassic) are probably related to the crustal extension  
453 associated with the Basque-Cantabrian basin. Specific structural evidences of these three later events have not  
454 been found and their temperatures were probably lower than those of the episode linked to the late-Variscan  
455 extensional episode, which, being related to igneous intrusions, probably gave rise to the paleothermal peak.

456 The zircon (U-Th)/He ages obtained by Fillon et al. (2016) indicate that the Westphalian (Bashkirian-  
457 Moscovian) rocks involved in the dating had probably a temperature above 180°C up to 37-39 Ma ago (Eocene).  
458 This is consistent with the occurrence of Alpine ductile deformation, which resulted in a local crenulation  
459 cleavage.

## 460 **6 Conclusions**

461 Study of the low-grade metamorphic rocks and associated structures in the south-eastern sector of the CZ has  
462 allowed a model for the tectonothermal evolution of the core of an arcuate orogenic belt to be developed. This  
463 core, although it is a part of a foreland fold and thrust belt where diagenetic conditions are dominant, portrays a  
464 complex evolution due to its special location inside the belt. It was thrust during the Carboniferous by large units  
465 from south, west and north, which resulted in a great accumulation of syntectonic sediments, and development of  
466 unconformities and structures. The latter arose as a result of compression in different directions that also  
467 generated a crustal thickening. The emplacement of the last thrust unit (Picos de Europa unit) produced a N – S  
468 shortening that generated thrusts and associated folds. Shortly afterwards, upright folds with E – W trend and  
469 associated cleavage ( $S_1$ ) developed, mainly in the northern part of the sector. The ductile deformation occurred  
470 under thermal conditions which reached the anchizone and the ancaizone in some areas. This represents the first  
471 tectonothermal event registered in the southeastern sector of the CZ.

472 At the end of the Variscan deformation, gravitational instability gave rise to an extensional episode and the  
473 corresponding crustal thinning. During this event an increase in the thermal gradient enabled ductile deformation  
474 and low-grade metamorphism to take place in some areas (second tectonothermal event), mainly in the central  
475 part (Curavacas-Lechada syncline) and the southern part (Valsurbio unit) of the sector. The ductile deformation  
476 produced gently dipping cleavage ( $S_2$ ) crosscutting earlier upright  $F_1$  folds. Some small open cascade folds were  
477 also produced. The metamorphism reached epizonal and epicaizonal conditions during this event. The process  
478 culminated in the Cisuralian with the intrusion of igneous rocks and the development of contact metamorphism  
479 around the larger igneous bodies. In the case of Peña Prieta granodiorite, post  $S_1$  andalusite porphyroblasts  
480 developed. Hydrothermal fluids were common during this extensional episode, resulting in the development of  
481  $Prl$  and  $Cld$ , and textural alteration and high CAI dispersions in conodont samples.

482 As a whole, the metamorphic grade is independent of the stratigraphic location of the samples and the trend  
483 of the main structures, indicating the late-orogenic character of the tectonothermal events. The thermal level  
484 decreases progressively northwards inside the adjacent Picos de Europa unit. On the other hand, the  
485 metamorphism associated with the extensional episode in the PCU is extended westwards as an elongated area  
486 whose development was probably favoured by the rise of fluids along faults, especially along the León fault.

487 With the development of the adjacent Basque-Cantabrian basin, the extensional regime extended during the  
488 Mesozoic, with the probable occurrence of hydrothermal processes. The temperature of the rocks was probably  
489 important during Cenozoic times ( $> 180^\circ\text{C}$  until the late-Eocene after Fillon et al., 2016, in the eastern part of the  
490 study area), so that the Alpine deformation generated locally some ductile deformation with crenulation cleavage  
491 affecting the  $S_2$  cleavage.

492 The evolution described above is summarized in Table 1.

493

494 **Acknowledgements.** This paper is dedicated to the memory of Andrés Pérez Estaún in recognition to his major  
 495 contribution to the study the geology of the Variscan belt in Spain and his pioneer work on the low-grade  
 496 metamorphism of the area, and in gratitude for fruitful cooperation over a period of many years. The present  
 497 paper has been supported by the CGL2015-66997-R project funded by the **Ministerio de Economía y**  
 498 **Competitividad of Spain.** The authors acknowledge Dr. Robin Offler who read an earlier version of this paper  
 499 and suggested improvements. Susana García-López acknowledges the cooperation of C. F. Winkler Prins from  
 500 the National Museum of Natural History (Leiden, Netherlands) and H. Jahnke from the Institut und Museum für  
 501 Geologie und Paläontologie (Göttingen, Germany) **for providing** access to the Cantabrian conodont collections  
 502 of these institutions.

### 503 **References**

- 504 Aller, J.: La estructura del borde sudoeste de la Cuenca Carbonífera Central (Zona Cantábrica, NW de España),  
 505 Trabajos de Geología, 11, 3-14, 1981.
- 506 Aller, J.: La estructura del sector meridional de las unidades del Aramo y Cuenca Carbonífera Central,  
 507 Principado de Asturias, Spain, 180 pp, 1986.
- 508 Aller, J., Bastida, B., Brime, C., and Pérez-Estaún, A.: Cleavage and its relation with metamorphic grade in the  
 509 Cantabrian Zone (Hercynian of North-West Spain), Sci. Géol. Bull., 40, 255-272, 1987.
- 510 Aller, J., Valín, M. L., García-López, S., Brime, C., and Bastida, F.: Superposition of tectono-thermal episodes in  
 511 the southern Cantabrian Zone (foreland thrust and fold belt of the Iberian Variscides, NW Spain), Bull. Soc.  
 512 Géol. France, 176, 503-514, 2005.
- 513 Alonso, J. L. and Rodríguez Fernández, L. R.: Las discordancias carboníferas de la región del Pisuerga-Carrión  
 514 (Cordillera Cantábrica, NO de España). Significado orogénico, Comptes Rendus del X Congreso  
 515 Internacional de Estratigrafía y Geología del Carbonífero, Instituto Geológico y Minero de España, Madrid,  
 516 Spain, 533-540, 1983.
- 517 Alonso, J. L., Marcos, A., and Suárez, A.: Paleogeographic inversion resulting from large out of sequence  
 518 breaching thrusts: The León Fault (Cantabrian Zone, NW Iberia). A new picture of the external Variscan  
 519 Thrust belt in the Ibero-Armorican Arc, Geologica Acta, 7, 451-473, doi: 10.1344/105.000001449, 2009.
- 520 Ambrose, T., Carballeira, J, López Rico, J., and Wagner, R. H.: Mapa Geológico de España E. 1:50.000, Hoja Nº  
 521 107, Inst.Geol. Min. España, 1984.
- 522 Árkai, P.: Chlorite crystallinity: an empirical approach and correlation with illite crystallinity, coal rank and  
 523 mineral facies as exemplified by Palaeozoic and Mesozoic rocks of northeast Hungary, J. Metamorph. Geol.,  
 524 9, 723-734, 1991.
- 525 Árkai, P.: Phyllosilicates in very low-grade metamorphism: transformation to micas, in: Mottana A., Sassi, F. P.,  
 526 Thompson J. B., Guggenheim, S. (eds), Micas: crystal chemistry and metamorphic petrology, Mineralogical  
 527 Society of America, Blacksburg, Virginia, Rev. Mineral. Geochem. 46, 463-478. 2002.
- 528 Árkai, P., Horváth, Z. A., and Tóth, M.: Transitional very low-and low-grade regional metamorphism of the  
 529 Paleozoic formations, Uppony Mountains, NE-Hungary: mineral assemblages, illite-crystallinity, -b0 vitrinite  
 530 reflectance data, Acta Geol. Acad. Sci. Hung, 24, 265-294, 1981.

- 531 Árkai, P., Sassi, F. P., and Sassi, R.: Simultaneous measurements of chlorite and illite crystallinity: a more  
532 reliable tool for monitoring low- to very low grade metamorphism in metapelites. A case study from the  
533 Southern Alps (NE Italy), *Eur. J. Mineral.*, 7, 1115-1128, 1995.
- 534 Árkai, P., Faryad, S. W., Vidal, O., and Balogh, K.: Very low-grade metamorphism of sedimentary rocks of the  
535 Meliata unit, Western Carpathians, Slovakia: implications of phyllosilicate characteristics, *Int. J. Earth Sci.*,  
536 92, 68-85, doi:10.1007/s00531-002-0303-x, 2003.
- 537 Árkai, P., Sassi, F. P., and Desmonds, J. 2007. 5. Very low- to low-grade metamorphic rocks. Recommendations  
538 by the IUGS Subcommittee on the Systematics of Metamorphic rocks, Web version of 01/02/07, 2007.
- 539 Ayllón, F., Bakker, R. J., and Warr, L. N.: Re-equilibration of fluid inclusions in diagenetic-anchizonal rocks of  
540 the Ciñera-Matallana coal basin (NW Spain), *Geofluids*, 3, 49-68, doi: 10.1046/J.1468-8123.2003.00048.X,  
541 2003.
- 542 Bastida, F., Brime, C., García-López, S., and Sarmiento, G. N.: Tectonothermal evolution in a region with thin  
543 skinned tectonics: the western nappes in the Cantabrian Zone (Variscan belt of NW Spain), *Int. J. Earth. Sci.*  
544 (*Geol. Rundsch.*), 88, 38-48, doi: 10.1007/s005310050244, 1999.
- 545 Bastida, F., Brime, C., García-López, S., Aller, J., Valín, M. L., and Sanz López, J.: Tectonothermal evolution of  
546 the Cantabrian Zone (NW Spain), in: *Palaeozoic conodonts from northern Spain*, editors: García-López, S.,  
547 and Bastida F., *Cuadernos del Museo Geominero 1*, Inst. Geol. y Minero, Madrid, Spain, 105-23, 2002.
- 548 Bastida, F., Blanco-Ferrera, S., García-López, S., Sanz-López, J., and Valín, M.L.: Transition from diagenesis to  
549 metamorphism in a calcareous tectonic unit of the Iberian Variscan belt (Central massif of the Picos de  
550 Europa, NW Spain), *Geol. Mag.*, 141, 617-628, doi: 10.1017/S0016756804009653, 2004.
- 551 Battaglia, S.: Variations in the chemical composition of illite from five geothermal fields: a possible  
552 geothermometer, *Clay Miner.*, 39, 501-510, doi:10.1180/0009855043940150, 2004.
- 553 Blanco-Ferrera, S., Sanz-López, J., García-López, S., Bastida, F., and Valín, M. L.: Conodont alteration and  
554 tectonothermal evolution of a diagenetic unit in the Iberian Variscan belt (Ponga-Cuera unit, NW Spain),  
555 *Geol. Mag.*, 148, 35-49, doi:10.1017/S0016756810000269, 2011.
- 556 Boni, M., Iannace, A., Bechstädt, T., and Gasparri, M.: Hydrothermal dolomites in SW Sardinia (Italy) and  
557 Cantabria (NW Spain): evidence for late- to post-Variscan widespread fluid-flow events, *J. Geochem.*  
558 *Explor.* 69-70, 225-228, 2000.
- 559 Brime, C.: A diagenesis to metamorphism transition in the Hercynian of north-west Spain, *Mineral. Mag.*, 49,  
560 481-484, 1985.
- 561 Brime, C.: Metamorfismo de bajo grado: ¿diferencias en escala o diferencias en grado metamórfico?, *Trabajos*  
562 *de Geología*, 21, 61-66, 1999.
- 563 Brime, C. and Valín, M. L.: Asociaciones con cloritoide en rocas de bajo grado metamórfico de la Unidad del  
564 Pisuerga-Carrión (Zona Cantábrica, NO de España), *Macla*, 6, 105-108, 2006.
- 565 Brime, C., Talent, J. A., and Mawson, R.: Low-grade metamorphism in the Palaeozoic sequence of the  
566 Townsville hinterland, northeastern Australia, *Aust. J. Earth Sci.*, 50, 751-767, doi:10.1111/j.1440-  
567 0952.2003.01023.x, 2003.
- 568 Brouwer, A.: Deux facies dans le Dévonien des montagnes cantabriques meridionales, *Breviora Geológica*  
569 *Astúrica*, VIII, 3-10, 1964.
- 570 Bucher, K. and Frey, M.: *Petrogenesis of Metamorphic Rocks*, 6<sup>th</sup> Edn. Springer-Verlag, Berlín, 318 pp, 1994.

- 571 Clauer, N. and Weh, A.: Time constraints for the tectono-thermal evolution of the Cantabrian Zone in NW Spain  
572 by illite K-Ar dating, *Tectonophysics*, 623, 39-51, <http://dx.doi.org/10.1016/j.tecto.2014.03.013>, 2014.
- 573 Colmenero, J. R. and Prado, J. G.: Coal basins in the Cantabrian Mountains, Northwestern Spain, *Int. J. Coal*  
574 *Geol.*, 23, 215-229, 1993.
- 575 Colmenero, J. R., Suárez-Ruiz, I., Fernández-Suárez, J., Barba, P., and Llorens, T.: Genesis and Rank  
576 distribution of Upper Carboniferous coal basins in the Cantabrian Mountains, Northern Spain, *Int. J. Coal*  
577 *Geol.*, 76, 187-204, doi:10.1016/j.coal.2008.08.004, 2008.
- 578 Colmenero, J. R., Vargas, I., García-Ramos, J. C., Manjón, M., Creapo, A., and Matas, J.: Mapa Geológico de  
579 España E. 1:50.000, Hoja Nº 132, Guardo, Inst.Geol. Min. España, 1982.
- 580 Corretgé, L. G. and Suárez, O.: Igneous rocks of the cantabrian/Palentine Zone, in: Dallmeyer R. D., and  
581 Martínez García, E. (eds), *Pre-Mesozoic Geology of Iberia* 72-79, Springer, Berlin, 1990.
- 582 Corretgé, L. G., Cienfuegos, I., Cuesta, A., Galán, G., Montero, P., Rodríguez Pevida, L. S., Suárez, O., and  
583 Villa, L.: Granitoides de la Región Palentina (Cordillera Cantábrica, España), *Actas e Comunicações , IX*  
584 *Reuniao sobre a Geologia do Oeste Peninsular* (Porto, 1985), *Memorias Univ. Do Porto*, 1, 469-478, 1987.
- 585 Eberl, D. D.: Three zones for illite formation during burial diagenesis and metamorphism, *Clays Clay Miner.*, 41,  
586 26-37, 1993.
- 587 Engelder, T. and Marshak, S.: Disjunctive cleavage formed at shallow depths in sedimentary rocks, *J. Struct.l*  
588 *Geol.*, 7, 327-343, 1985.
- 589 Epstein, A. G., Epstein, J. B. and Harris, L. D.: Conodont color alteration-an index to organic metamorphism,  
590 Washington, D.C., *Geol. Surv. Prof. Pap.*, 995, 1-27, 1977.
- 591 Essene, E. J. and Peacor, D. R.: Clay mineral thermometry - a critical perspective, *Clays Clay Miner.*, 43, 540-  
592 553, 1995.
- 593 Ferreiro Mählmann, R., Petrova, T. V., Pironon, J., Stern, W. B., Ghanbaja, J., Dubessy, J., and Frey, M.:  
594 Transmission electron microscopy study of carbonaceous material in a metamorphic profile from diagenesis  
595 to amphibolite facies (Bündnerschiefer, eastern Switzerland), *Schweiz. Mineral. Petrogr. Mitt.*, 82, 253-272,  
596 2002.
- 597 Fillon, C., Pedreira, D., van der Beek, P., Huismans, R. S., Barbero, L., and Pulgar, J. A.: Alpine exhumation of  
598 the central Cantabrian Mountains, Northwest Spain, *Tectonics*, 35, 339-356, 2016, doi:  
599 10.1002/2015TC004050.
- 600 Frankenfeld, H.: El manto del Montó-Arauz; interpretación estructural de la Región del Pisuerga-Carrión (Zona  
601 Cantábrica España), *Trabajos de Geología*, 13, 37-47, 1983.
- 602 Frey, M.: Progressive low-grade metamorphism of a black shale formation, Central Swiss Alps, with special  
603 reference to pyrophyllite and margarite bearing assemblages, *J. Petrol.*, 19, 1, 95-135, 1978.
- 604 Frey, M.: Very low-grade metamorphism of clastic sedimentary rocks, in: Frey M. (ed), *Low temperature*  
605 *metamorphism*, Blackie, Glasgow, pp 9-58, 1987.
- 606 Frey, M., Teichmüller, M., Teichmüller, R., Müllis, J., Künzi, B., Breitschmid, A., Gruner, U., and Schwizer, B.:  
607 Very low grade metamorphism in external parts of the Central Alps: illite crystallinity, coal rank and fluid  
608 inclusion data. *Eclogae Geol. Helv.* 73:173-203, 1980
- 609 Gallastegui, J.: Estructura cortical de la cordillera y margen continental cantábricos: perfiles ESCI-N, *Trabajos*  
610 *de Geología*, 22, 9-234, 2000.



- 611 Gallastegui, G., Heredia, N., Rodríguez Fernández, L. R., and Cuesta, A.: El “stock” de Peña Prieta en el  
612 contexto del magmatismo de la Unidad del Pisuerga-Carrión (Zona Cantábrica, N de España), Cuadernos do  
613 Laboratorio Xeolóxico de Laxe, 15, 203-215, 1990.
- 614 García-López, S., Brime, C., Bastida, F., and Sarmiento, G. N.: Simultaneous use of thermal indicators to  
615 analyse the transition from diagenesis to metamorphism: an example from the Variscan Belt of northwest  
616 Spain, *Geol. Mag.*, 134, 323–334, 1997.
- 617 García-López, S., Bastida, F., Brime, C., Aller, J., Valín, M. L., Sanz-López J., Méndez, C. A., and Menéndez-  
618 Álvarez, J. R.: Los episodios metamórficos de la Zona Cantábrica y su contexto estructural, *Trabajos de*  
619 *Geología*, 21, 177-187, 1999.
- 620 García-López, S., Bastida, F., Aller, J., and Sanz-López J.: Geothermal palaeogradients and metamorphic  
621 zonation from the conodont colour alteration index (CAI), *Terra Nova*, 13, 2, 79-83, , 2001.
- 622 García-López, S., Blanco-Ferrera, S., and Sanz-López, J.: Aplicación de los conodontos al conocimiento de la  
623 evolución tectonotérmica de las zonas externas de los orógenos, *Revista Española de Micropaleontología*, 38,  
624 289-298, 2006.
- 625 García-López, S., Brime, C., Valín, M. L., Sanz-López J., Bastida, F., Aller, J., and Blanco Ferrera, S.:  
626 Tectonothermal evolution of a foreland fold and thrust belt: the Cantabrian Zone (Iberian Variscan belt, NW  
627 Spain), *Terra Nova*, 19, 469-475, doi: 10.1111/j.1365-3121.2007.00773.x, 2007.
- 628 García-López, S., Bastida, F., Aller, J., Sanz-López, J., Marín, J. A., and Blanco Ferrera, S.: Tectonothermal  
629 evolution of a major thrust system: the Esla–VU (Cantabrian Zone, NW Spain), *Geol. Mag.*, 150, 1047-1061,  
630 doi:10.1017/S0016756813000071, 2013.
- 631 Gasparrini, M., Bakker, R. J., Bechstädt, Th., and Boni, M.: Hot dolomites in a Variscan foreland belt:  
632 hydrothermal flow in the Cantabrian Zone (NW Spain), *J. Geochem. Explor.* 78-79, 501-507, doi:  
633 10.1016/S0375-6742(03)00115-8, 2003.
- 634 Gasparrini, M., Bechstädt, Th., and Boni, M.: Massive hydrothermal dolomites in the southwestern Cantabrian  
635 Zone (Spain) and their relation to the Late Variscan evolution, *Mar. Pet. Geol.*, 23, 543-568,  
636 doi:10.1016/j.marpetgeo.2006.05.003, 2006.
- 637 Gómez-Fernández, F., Mangas, J., Both, R. A., and Arribas, A.: Metallogenesis of the Zn-Pb deposits of the  
638 southeastern region of the Picos de Europa (Cantabria, Spain), in: Fenoll Hach-Ali, P., Torres-Ruiz J., and  
639 Gervilla F. (eds), *Current research in geology applied to ore deposits*, Univ. Granada, Granada, Spain, 113-  
640 116, 1993.
- 641 Gómez-Fernández, F., Both, R. A., Mangas, J., and Arribas, A.: Metallogenesis of Zn-Pb carbonate-hosted  
642 mineralization in the southeastern region of the Picos de Europa (Central Northern Spain) Province: geologic,  
643 fluid inclusion, and stable isotopes studies. *Econ. Geol.*, doi:95, 19-40, 10.2113/gsecongeo.95.1.19, 2000.
- 644 Groshong, Jr R. H., Pfiffner, O. A., and Pringle, L. R.: Strain partitioning in the Helvetic thrust belt of eastern  
645 Switzerland from the leading edge to the internal zone, *J. Struct. Geol.* 6, 5-18, 1984.
- 646 Guggenheim, S., Bain, D. C., Bergaya, F., Brigatti, M. F., Drits, V. A., Eberl, D. D., Formoso, M. L. L., Galán,  
647 E., Merriman, R. J., Peacor, D.R., Stanjek, H., and Watanabe, T.: Report of the Association Internationale  
648 pour l'Etude des Argiles (AIPEA) Nomenclature Committee for 2001: order, disorder, and crystallinity in  
649 phyllosilicates and the use of the “Crystallinity Index”, *Clays Clay Miner.*, 50, 406-409, 2002.

- 650 Gutiérrez-Alonso, G., Fernández-Suárez, J., and Weil, A.: Orocline triggered lithospheric delamination, in:  
651 Sussman, A. J., and Weil, A. B., (eds), *Orogenic Curvature: Integrating Paleomagnetic and Structural*  
652 *Analyses: Geol. Soc. Am. Special Paper 383*, 121–130, 2004.
- 653 Gutiérrez-Alonso, G., Murphy, J. B., Fernández-Suárez, J., Weil, A., Piedad Franco, M., and Gonzalo, J. C.:  
654 Lithospheric delamination in the core of Pangea: Sm-Nd insights from the Iberian mantle, *Geology*, 39, 155-  
655 158, doi: 10.1130/G31468.1, 2011.
- 656 Hemley, J. J., Monteya, J. W., Marinenko, J. W., and Luce, R. W.: Equilibria in the system  $Al_2O_3 - SiO_2 - H_2O$   
657 and some general implications for alteration mineralization processes, *Econ. Geol.*, 75, 210-228, 1980.
- 658 Heredia, N., Alonso, J. L., and Rodríguez Fernández, L. R. Mapa Geológico de España E. 1:50.000, Hoja N°  
659 105, Riaño, Inst. Geol. Min. España, 1997.
- 660 Heredia, N., Navarro, D., Rodríguez Fernández, L. R., Pujalte, V., and García Mondéjar, J.: Mapa Geológico de  
661 España E. 1:50.000, Hoja N° 82, Tudanca, Inst. Geol. Min. España, 1986.
- 662 Heredia, N., Rodríguez Fernández, L. R., Suárez, A., and Álvarez Marrón, J.: Mapa Geológico de España E.  
663 1:50.000, Hoja N° 80, Burón, Inst. Geol. Min. España, 1991.
- 664 Hosterman, J. W., Wood, G. H., and Beryin, M. J.: Mineralogy of underclays in the Pennsylvania anthracite  
665 region, U.S. Geological Survey Professional Paper 700-C, C89-C97, 1970.
- 666 Hunziker, J. C., Frey, M., Clauer, N., Dallmeyer, R. D., Friedrichsen, H., Flehmig, W., Hochstrasser, K.,  
667 Roggwiler, P., and Schwander, H.: The evolution of illite to muscovite: mineralogical and isotopic data from  
668 Glarus Alps, Switzerland, *Contrib. Mineral. Petrol.*, 92, 157-180, 1986.
- 669 Julivert, M.: Décollement tectonics in the Hercynian Cordillera of NW Spain, *Am. J. Sci.*, 270, 1-29, 1971.
- 670 Julivert, M. : Hercynian orogeny and Carboniferous paleogeography in northwestern Spain: A model of  
671 deformation-sedimentation relationships, *Z. dt. geol. Ges.*, 129, 565-592, 1978.
- 672 Julivert, M., Ramirez del Pozo, J., and Truyols, J.: Le reseau de failles et la couverture post-hercynienne dans les  
673 Asturies, in: *Histoire structurale du Golfe de Gascogne*, Publications de l'Institut Français du Pétrole,  
674 Editions Tech. 2, V.3.1- V.3.34, 1971.
- 675 Julivert, J. and Navarro, D.: Mapa Geológico de España E. 1:50.000, Hoja N° 55, Beleño, Inst. Geol. Min.  
676 España, 1984.
- 677 Keller, M., and Krumm, S.: Variscan versus Caledonian and Precambrian metamorphic events in the Cantabrian  
678 Mountains. *Z. dt. Geol. Ges.*, 144, 88-103, 1993.
- 679 Kisch, H. J.: Mineralogy and petrology of burial diagenesis (burial metamorphism) and incipient metamorphism  
680 in clastic rocks, in: Larsen G, Chilingar G. V. (eds), *Diagenesis in sediments and sedimentary rocks*, 2.  
681 Elsevier, Amsterdam, pp 289-493 and 513-541, 1983.
- 682 Kisch, H. J.: Correlation between indicators of very-low grade metamorphism, in: Frey, M. (ed), *Low*  
683 *temperature metamorphism*, Blackwell Science, Claridge, pp. 227-300, 1987.
- 684 Kisch, H. J.: Illite crystallinity: recommendations on sample preparation, X-ray diffraction settings and  
685 interlaboratory settings, *J. Metamorph. Geol.*, 9, 665-670, 1991.
- 686 Kisch, H. J., Árkai, P., and Brime, C.: On the calibration of the illite Kübler index (illite “crystallinity”),  
687 *Schweiz. Mineral. Petrogr. Mitt.* 84, 232-331, 2004.
- 688 Köberle, T, Keller, M., and Krumm, S.: Metamorphism in the southeastern corner of the Cantabrian Mountains  
689 as revealed by the Upper Devonian Murcia Quartzite, *Zbl. Geol. Paläont. Teil I*, 5-6, 447-460, 1998.

- 690 Koopmans, B. N.: The sedimentary and structural history of the Valsurvio dome, Cantabrian Mountains, Spain,  
691 Leidse. Geol. Med., 26, 121-232, 1962.
- 692 Kübler, B.: La cristallinité d'illite et les zones tout à fait supérieures du metamorphism. Etages  
693 tectoniques. Université Neuchâtel à la Baconnière, Neuchâtel, Switzerland, Colloques de Neuchâtel 1966,  
694 105-122, 1967.
- 695 Livi, K. J. T., Veblen, D.R., Ferry, J. M., and Frey, M.: Evolution of 2:1 layered silicates in low-grade  
696 metamorphosed Liassic shales of Central Switzerland, *J. Metamorph. Geol.*, 15, 323-344, 1997.
- 697 Llorens, T., Suárez-Ruiz, I., and Colmenero J. R.: Petrografía de los carbones cantabrienses (Carbonífero sup.)  
698 del Grupo Cea de la Cuenca Guardo-Valderrueda (León-Palencia), *Geogaceta*, 40, 279-282, 2006.
- 699 Lobato, L.: Geología de los valles altos de los ríos Esla, Yuso, Carrión y Deva. Institución Fray Bernardino de  
700 Sahagún, León (C.S.I.C.), 192 pp., 1977.
- 701 Lobato, L., Rodríguez Fernández, L. R., Heredia, N., Velando, F., and Matas, J.: Mapa Geológico de España E.  
702 1:50.000, Hoja N° 106, Camporredondo de Alba, *Inst. Geol. Min. España*, 1985.
- 703 López-Fernández, C., Pulgar, J. A., Gallart, J., González-Cortina, J. M., Díaz, J., and Ruiz, M.: Actividad  
704 sísmica reciente en el noroeste de la Península, 3ª Asamblea Hispano Portuguesa de Geodesia y Geofísica, 1-  
705 4, Valencia, 2002.
- 706 López-Fernández, C., Pulgar, J. A., Glez.-Cortina, J. M., Gallart, J., Díaz, J., and Ruiz, M.: Actividad sísmica en  
707 el noroeste de la Península Ibérica observada por la red sísmica local del Proyecto GASPI (1999-2002),  
708 *Trabajos de Geología*, 24, 91-106, 2004.
- 709 Maas, K.: The geology of Liébana, Cantabrian Mountains, Spain: Deposition and Deformation in a flysch area,  
710 *Leidse. Geol. Med.*, 49, 379-465, 1974.
- 711 Marcos, A. and Pulgar, J. A.: An approach to the tectonostratigraphic evolution of the Cantabrian Foreland thrust  
712 and fold belt, Hercynian Cordillera of NW Spain, *Neues Jahrb. Geol. Paläontol. Abh.*, 163, 256-260, 1982.
- 713 Marín, J. A.: Estructura del domo de Valsurvio y borde suroriental de la región del Pisuerga-Carrión (Zona  
714 Cantábrica, NO de España). Unpublished Ph. D. thesis, Oviedo University, 181 pp., 1997.
- 715 Marín, J. A., Pulgar, J. A., and Alonso, J. L.: La deformación alpina en el Domo de Valsurvio (Zona Cantábrica,  
716 NO de España). *Revista de la Sociedad Geológica de España*, 8, 111-116, 1995.
- 717 Marín, J. A., Villa, E., García-López, S., and Menéndez, J. R.: Estratigrafía y metamorfismo del Carbonífero de  
718 la zona de San Martín-Ventanilla (Norte de Palencia, Cordillera Cantábrica), *Revista de la Sociedad*  
719 *Geológica de España*, 9, 241-251, 1996.
- 720 Marquínez, J. and Marcos, A.: La estructura de la unidad del Gildar-Montó (Cordillera Cantábrica), *Trabajos de*  
721 *Geología*, 14, 53-64, 1984.
- 722 Martínez García, E., Marquínez, J., Heredia, N., Navarro, D., and Rodríguez Fernández, L. R.: Mapa Geológico  
723 de España E. 1:50.000, Hoja N° 56, Carreña-Cabrales, *Inst. Geol. Min. España*, 1984.
- 724 Martín-Izard, A., Palero, F. J., Regillón, R., and Vindel, E.: El skarn de Carracedo (San Salvador de Cantamuda).  
725 Un ejemplo de mineralización pirometasomática en el N. de la provincia de Palencia, *Stvdia Geologica*  
726 *Salmanticensia*, XXIII, 171-192, 1986.
- 727 Martín-Merino, G., Fernández, L. P., Colmenero, J. R., and Bahamonde, J. R.: Mass-transport deposits in a  
728 Variscan wedge-top foreland basin (Pisuerga area, Cantabrian Zone, NW Spain) , *Marine Geology*, 356, 71-  
729 87, <http://dx.doi.org/10.1016/j.margeo.2014.01.012>, 2014.

- 730 Merino-Tomé, O. A., Bahamonde, J. R., Colmenero, J. R., Heredia, N., Villa, E., and Farias, P.: Emplacement of  
731 the Cuera and Picos de Europa imbricate system at the core of the Iberian-Armorican arc (Cantabrian zone,  
732 Nord Spain: New precisions concerning the timing of arc closure. *Geol. Soc. Am. Bull.* 121, 729-751, doi:  
733 10.1130/B26366.1, 2009.
- 734 Merriman R. J. and Peacor D. R.: Very low-grade metapelites: mineralogy, microfabrics and measuring reaction  
735 progress. In: M. Frey and D. Robinson (eds), *Low-Grade Metamorphism*, Blackwell Science, Oxford, 10-60,  
736 1999.
- 737 Merriman, R. J. and Frey, M.: Patterns of very low-grade metamorphism in metapelitic rocks. In: Frey, M. and  
738 Robinson, D. (eds), *Low grade metamorphism*, Blackwell Science, London, pp 61-107, 1999.
- 739 Meunier, A.: *Clays*, Springer-Verlag, Berlín, Heidelberg, New York, 2005.
- 740 Moore, D. M. and Reynolds, R. C. Jr. X-ray diffraction and the identification and analysis of clay minerals,  
741 2nd ed., Oxford University Press, New York, 1997
- 742 Muchez, P., Heijlen, W., Banks, D., Blundell, D., Boni, M., and Grandia, F.: Extensional tectonics and the  
743 timing and formation of basin-hosted deposits in Europe, *Ore Geol. Rev.* 27, 241-264,  
744 doi:10.1016/j.oregeorev.2005.07.013, 2005.
- 745 Müllis, J.: The system methane-water as a geologic thermometer and barometer from the external parts of the  
746 Central Alps, *B. Minéral.*, 102, 526-536, 1979.
- 747 Müllis, J., Rahn, M. K., De Capitani, C., Stern, W. B., and Frey, M.: How useful is illite “crystallinity” as a  
748 geothermometer?, *Terra Nova*, 7, 128-129 (Supplement No. 1, Terra Abstracts), 1995.
- 749 Müllis, J., Rahn, M. K., Schwer, P., De Capitani, C., Stern, W. B., and Frey, M.: Correlation of fluid inclusion  
750 temperatures with illite “crystallinity” data and clay minerals chemistry in sedimentary rocks from the  
751 external parts of the Central Alps, *Schweiz. Mineral. Petrogr. Mitt.*, 82, 325-340, 2002.
- 752 Passchier, C. W. and Trouw, R. A. J.: *Microtectonics*, 2<sup>nd</sup> ed., Springer, Berlin, 366 pp, 2005.
- 753 Patrick, B. E., Evans, B. W., Dumoulin, J. A., and Harris, A. G.: A comparison of carbonate mineral and  
754 conodont color alteration index thermometry, Seward Peninsula, Alaska, *Geological Society of America*,  
755 *Abstracts with programs* 17, 399, 1985.
- 756 Phillips, G. N.: Widespread fluid infiltration during metamorphism of the Witwatersrand goldfields: generation  
757 of chloritoid and pyrophyllite, *J. metamorph. Geol.*, 6, 311-332, 1988.
- 758 Raven, J. G. M. and van der Pluijm, B. A.: Metamorphic fluids and transtension in the Cantabrian Mountains of  
759 northern Spain: an application of the conodont color alteration index, *Geol. Mag.*, 123, 673-681, 1986.
- 760 Rejebian, V. A., Harris, A. G., and Huebner, J. S.: Conodont color and textural alteration: an index to regional  
761 metamorphism, contact metamorphism, and hydrothermal alteration, *Geol. Soc. Am. Bull.*, 99, 471-479,  
762 1987.
- 763 Rodríguez Fernández, L. R.: La estratigrafía del Paleozoico y la estructura de la región de Fuentes Carrionas y  
764 áreas adyacentes (Cordillera herciniana, NO de España), *Cuadernos do Laboratorio Xeolóxico de Laxe*, Serie  
765 *Nova Terra*, 9, A Coruña, 240 pp. 1994.
- 766 Rodríguez Fernández, L. R. and Heredia, N.: La estratigrafía del Carbonífero y la estructura de la unidad del  
767 Pisuerga-Carrión. NO de España, *Cuadernos do Laboratorio Xeolóxico de Laxe*, 12, 207-229, 1987.
- 768 Rodríguez Fernández, L. R., Heredia, N., Navarro, D., Martínez-García, E., and Marquínez, J.: Mapa Geológico  
769 de España E. 1:50.000, Hoja N° 81, Potes. *Inst. Geol. Min. España*, 1994.

- 770 Savage, J. F.: Tectonic analysis of Lechada and Curavacas synclines, Yuso basin, León, NW Spain, Leidse.  
771 Geol. Med., 39, 193-247, 1967.
- 772 Środoń, J.: X-ray powder diffraction of illitic materials, Clays Clay Miner., 32, 337-349, 1984.
- 773 Suárez, O. and Corretgé, L. G.: Plutonismo y metamorfismo en las zonas Cantábrica y Asturoccidental-leonesa,  
774 in: Bea, F., Carnicero, A., Gonzalo, J. C., López Plaza, M., and Rodríguez Alonso, A. D. (eds) Geología de  
775 los granitoides y rocas asociadas del Macizo Hespérico (libro homenaje a L.C. García de Figuerola), Ed.  
776 Rueda, Madrid, 13-25, 1987.
- 777 Suárez, O. and García, A.: Petrología de la granodiorita de Peña Prieta (León, Santander, Palencia), Acta Geol.  
778 Hispanica, 9, 154-158, 1974.
- 779 Thompson, A. P.: A note on the kaolinite-pyrophyllite equilibrium. Am. J. Sci., 268, 454-458, 1970.
- 780 Theye, T., Seidel, E., and Vidal, O.: Carpholite, sudoite, and chloritoid in low-grade high-pressure metapelites  
781 from Crete and The Peloponnese, Greece, Eur. J. Mineral., 4, 3, 487-507, 1992.
- 782 Valverde-Vaquero, P., Cuesta, A., Gallastegui, G., Suárez, O., Corretgé, L. G., and Dunning, G. R.: U-Pb dating  
783 of late Variscan magmatism in the Cantabrian Zone (Northern Spain), Meeting of the European Union of  
784 Geosciences 10 (EUG 10), Strasbourg, Journal of Conference, Abstracts, 4, 101, 1999.
- 785 Van der Pluijm., B. A., Savage, J. F., and Kaars-Sijpestijn, C. H.: Variation in fold geometry in the Yuso Basin,  
786 northern Spain: implications for the deformation regime, J. Struct. Geol., 8, 879-886, 1986.
- 787 Van Veen, J.: The tectonic and stratigraphic history of the Cardaño area, Cantabrian Mountains, Northwest  
788 Spain, Leidse. Geol. Med., 35, 45-104, 1965.
- 789 Velde, B.: Introduction to clay minerals, Chapman and Hall, 198 pp., 1992
- 790 Von Gosen, W., Buggisch, W., and Krumms, S.: Metamorphism and deformation mechanisms in the Sierras  
791 Australes fold and thrust belt (Buenos Aires Province, Argentina). Tectonophysics, 185, 335-356  
792 doi:10.1016/0040-1951(91)90453-Y, 1991.
- 793 Warr, L. N. and Rice, H. N.: Interlaboratory standardization and calibration of clay mineral crystallinity and  
794 crystallite size data, J. Metamorph. Geol. 12, 141-152, 1994.
- 795 Winkler, H. G. F.: Petrogenesis of metamorphic rocks, 5th edition, Springer Verlag New York, 348 pp., 1979.
- 796 Zen, E-an: Metamorphism of Lower Paleozoic rocks in the vicinity of the Taconic Range in west-central  
797 Vermont, Am. Mineral., 45, 1-2, 129-175, 1960.
- 798

|                                                             |                                                                                                                                                                                                                                                                                                |
|-------------------------------------------------------------|------------------------------------------------------------------------------------------------------------------------------------------------------------------------------------------------------------------------------------------------------------------------------------------------|
| Variscan deformation                                        | Emplacement of north-directed Palentine nappes (prior or earliest Moscovian) and the adjacent western Cantabrian nappes (late Moscovian) with associated thrusts in the PCU                                                                                                                    |
| Variscan deformation (cont.)<br>(N-S shortening)            | Emplacement of the south-directed Picos de Europa unit; thrusts and folds in the PCU (Kasimovian-Gzhelian)                                                                                                                                                                                     |
|                                                             | Folds and axial plane cleavage ( $S_1$ ); first tectonothermal event, with deep diagenetic – low anchizonal and ancaizonal areas in the northern part of the PCU (late Gzhelian)                                                                                                               |
| Late Variscan gravitational readjustment; extensional event | Gently dipping cleavage ( $S_2$ ) associated with crosscutting folds; second tectonothermal event; very low- or low-grade metamorphism (high anchizone-epizone, and ancaizone-epicaizone) in the syncline of Curavacas-Lechada and the VU. Normal faults (latest Gzhelian to early Cisuralian) |
|                                                             | Intrusion of igneous rocks, contact metamorphism and wide development of hydrothermal processes (Cisuralian)                                                                                                                                                                                   |
| Extension linked to the Basque-Cantabrian basin             | Permian and Mesozoic hydrothermal episodes                                                                                                                                                                                                                                                     |
| Alpine deformation                                          | N-S shortening, tightening of gentle folds, local crenulation cleavage and tilting of rocks northwards (Cenozoic).                                                                                                                                                                             |

799 **Table 1. Tectonothermal evolution of the southeastern sector of the Cantabrian Zone.**

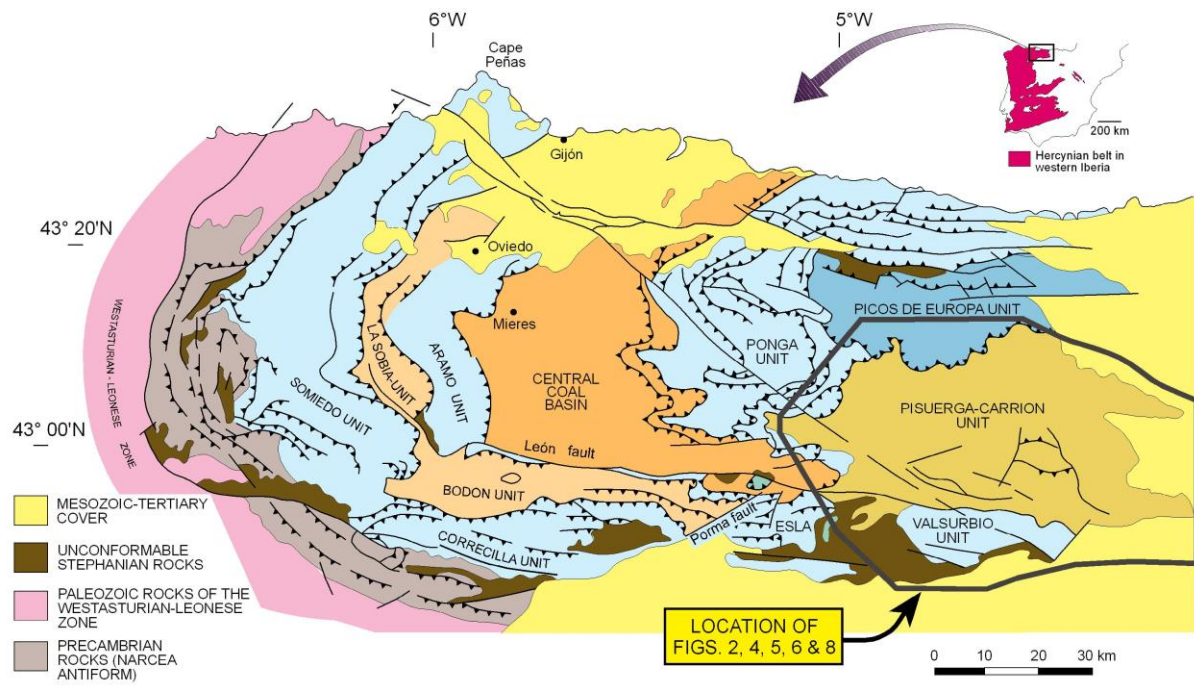

800

801 **Figure 1. Generalized geological map of the Cantabrian Zone (after Julivert 1971) showing major thrust**802 **units and the location of the study area.**

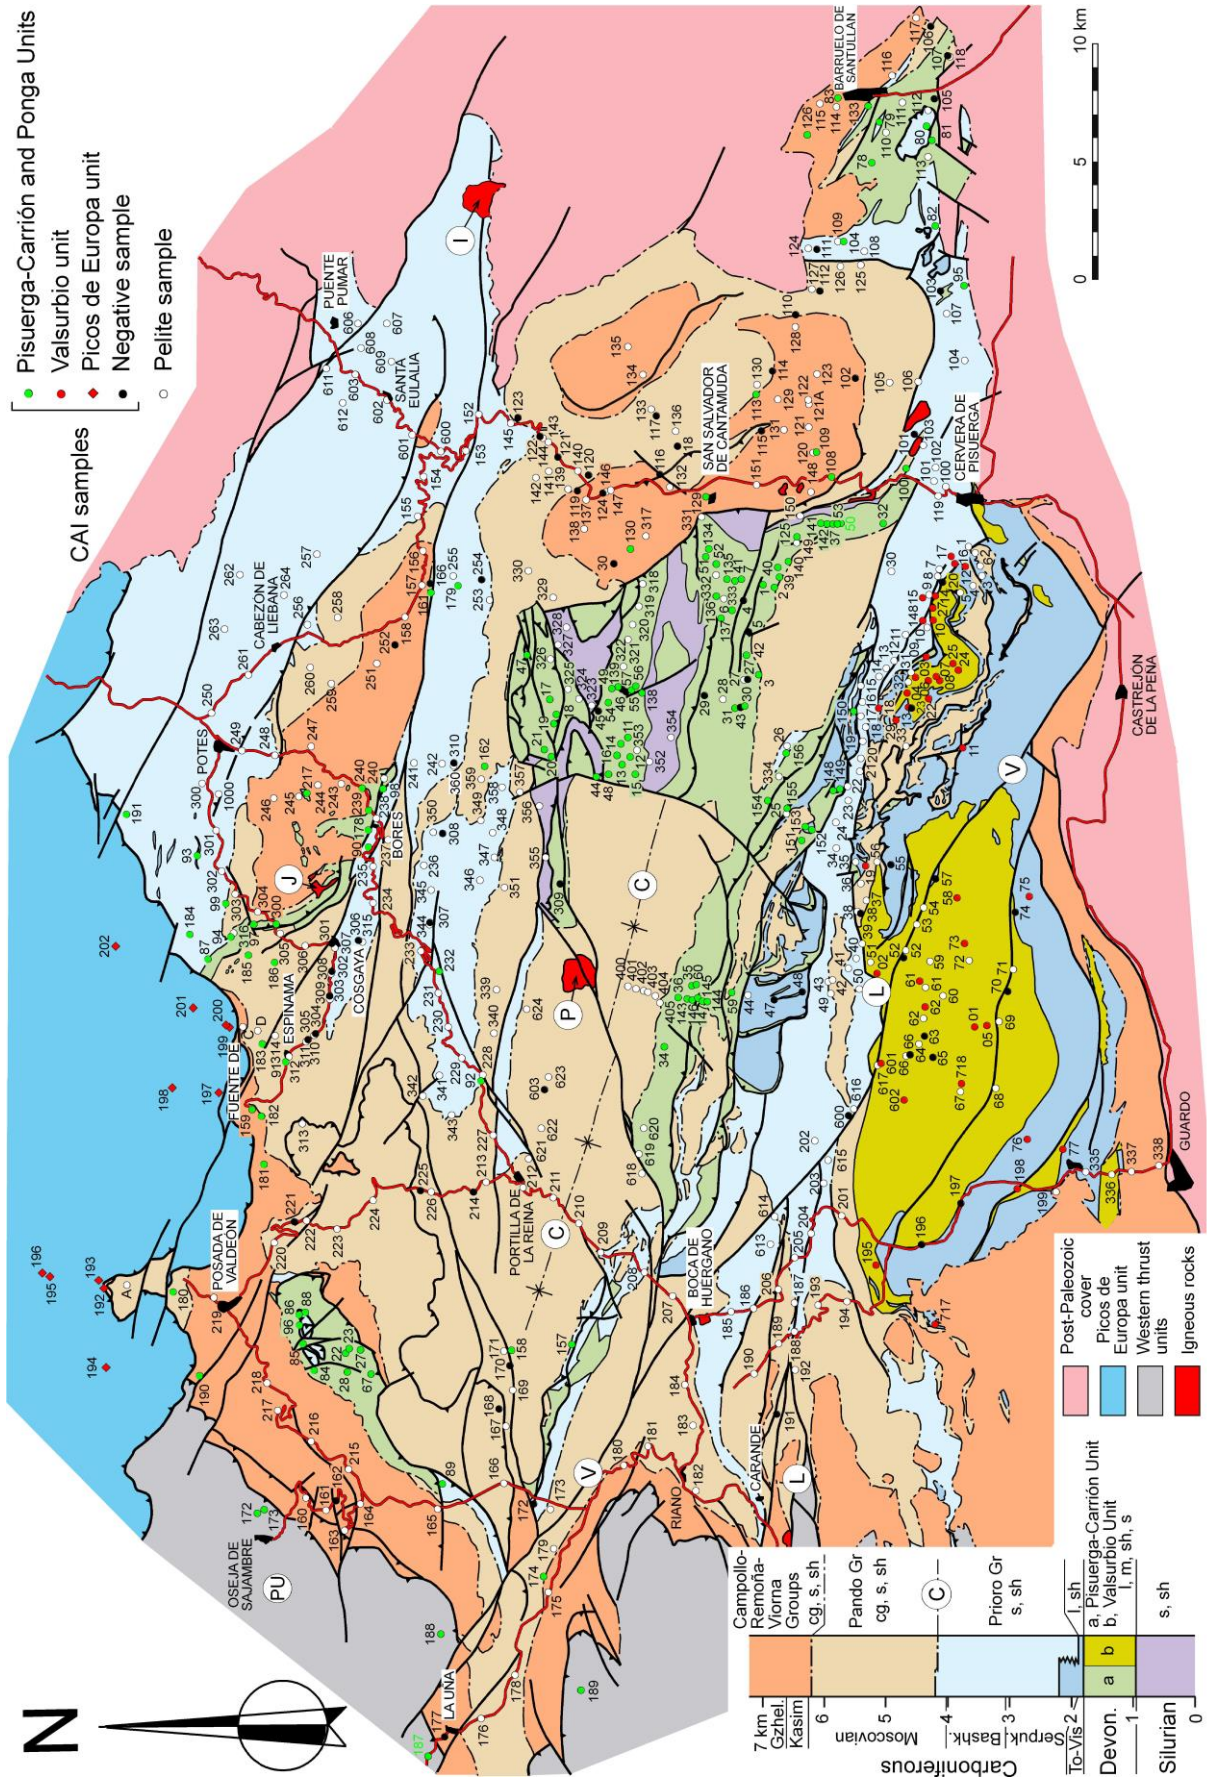



804 **Figure 2. Geological map of the southeastern part of the Cantabrian Zone showing sampled localities**  
 805 **(composed from Lobato, 1977; Colmenero et al., 1982; Ambrose et al., 1984; Julivert and Navarro, 1984;**  
 806 **Martínez García et al., 1984; Lobato et al., 1985; Heredia et al, 1986, 1991, 1997; Rodríguez Fernández,**  
 807 **1994; Rodríguez Fernández et al., 1994). Devonian and Silurian rocks of the PCU form the Palentine**  
 808 **nappes. cg, conglomerate; l, limestone; m, marl; s, sandstone; sh, shale. C, Curavacas-Lechada syncline; I,**  
 809 **Pico Iján granodiorite; J. Pico Jano granodiorite; L, León fault; P, Peña Prieta granodiorite; PU, Ponga**  
 810 **unit; V, Ventaniella fault. Picos de Europa conodont samples after Bastida et al., 2004; Valsurbio**  
 811 **conodont samples after García-López et al., 2013.**

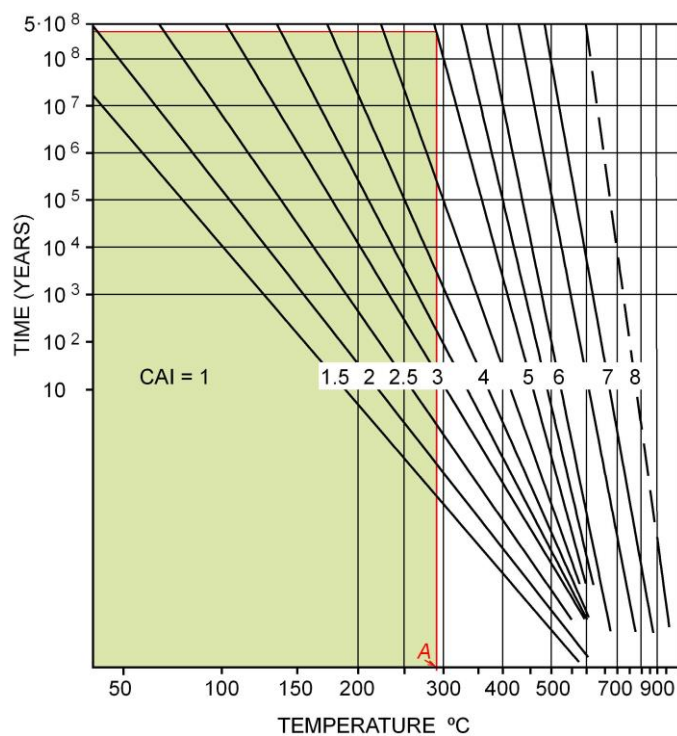

812  
 813 **Figure 3. Arrhenius plot to determine paleotemperature from CAI values (on the lines) and heating time**  
 814 **(from Rejebian et al., 1987). Point A indicates the minimum temperature necessary to obtain a CAI = 5 for**  
 815 **a rock with an age of 400 Ma. The green area shows the temperatures and heating times unable to**  
 816 **produce CAI  $\geq 5$  in this rock.**

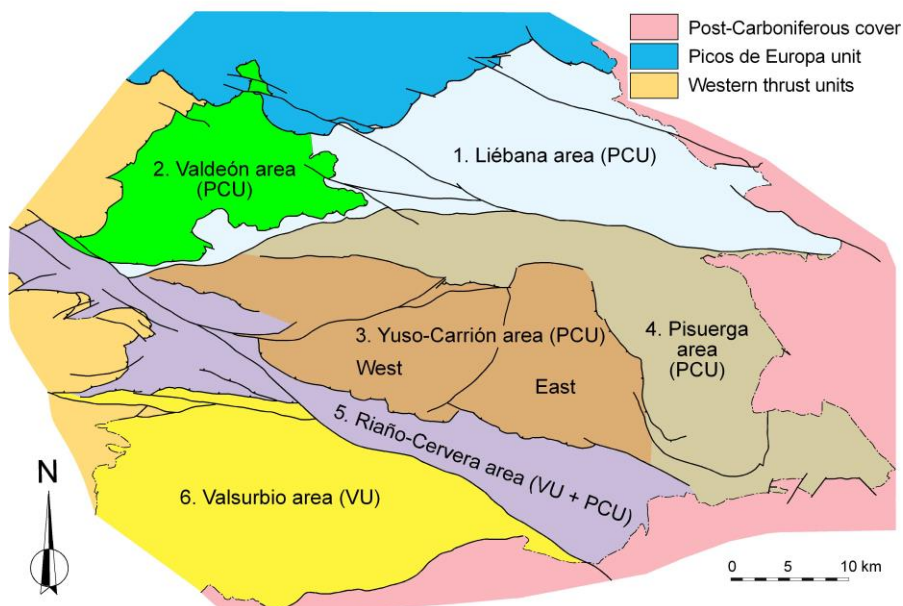

817

818 **Figure 4. Diagrammatic map indicating the areas in which the study units have been subdivided, following**819 **Martín-Merino et al. (2014)**

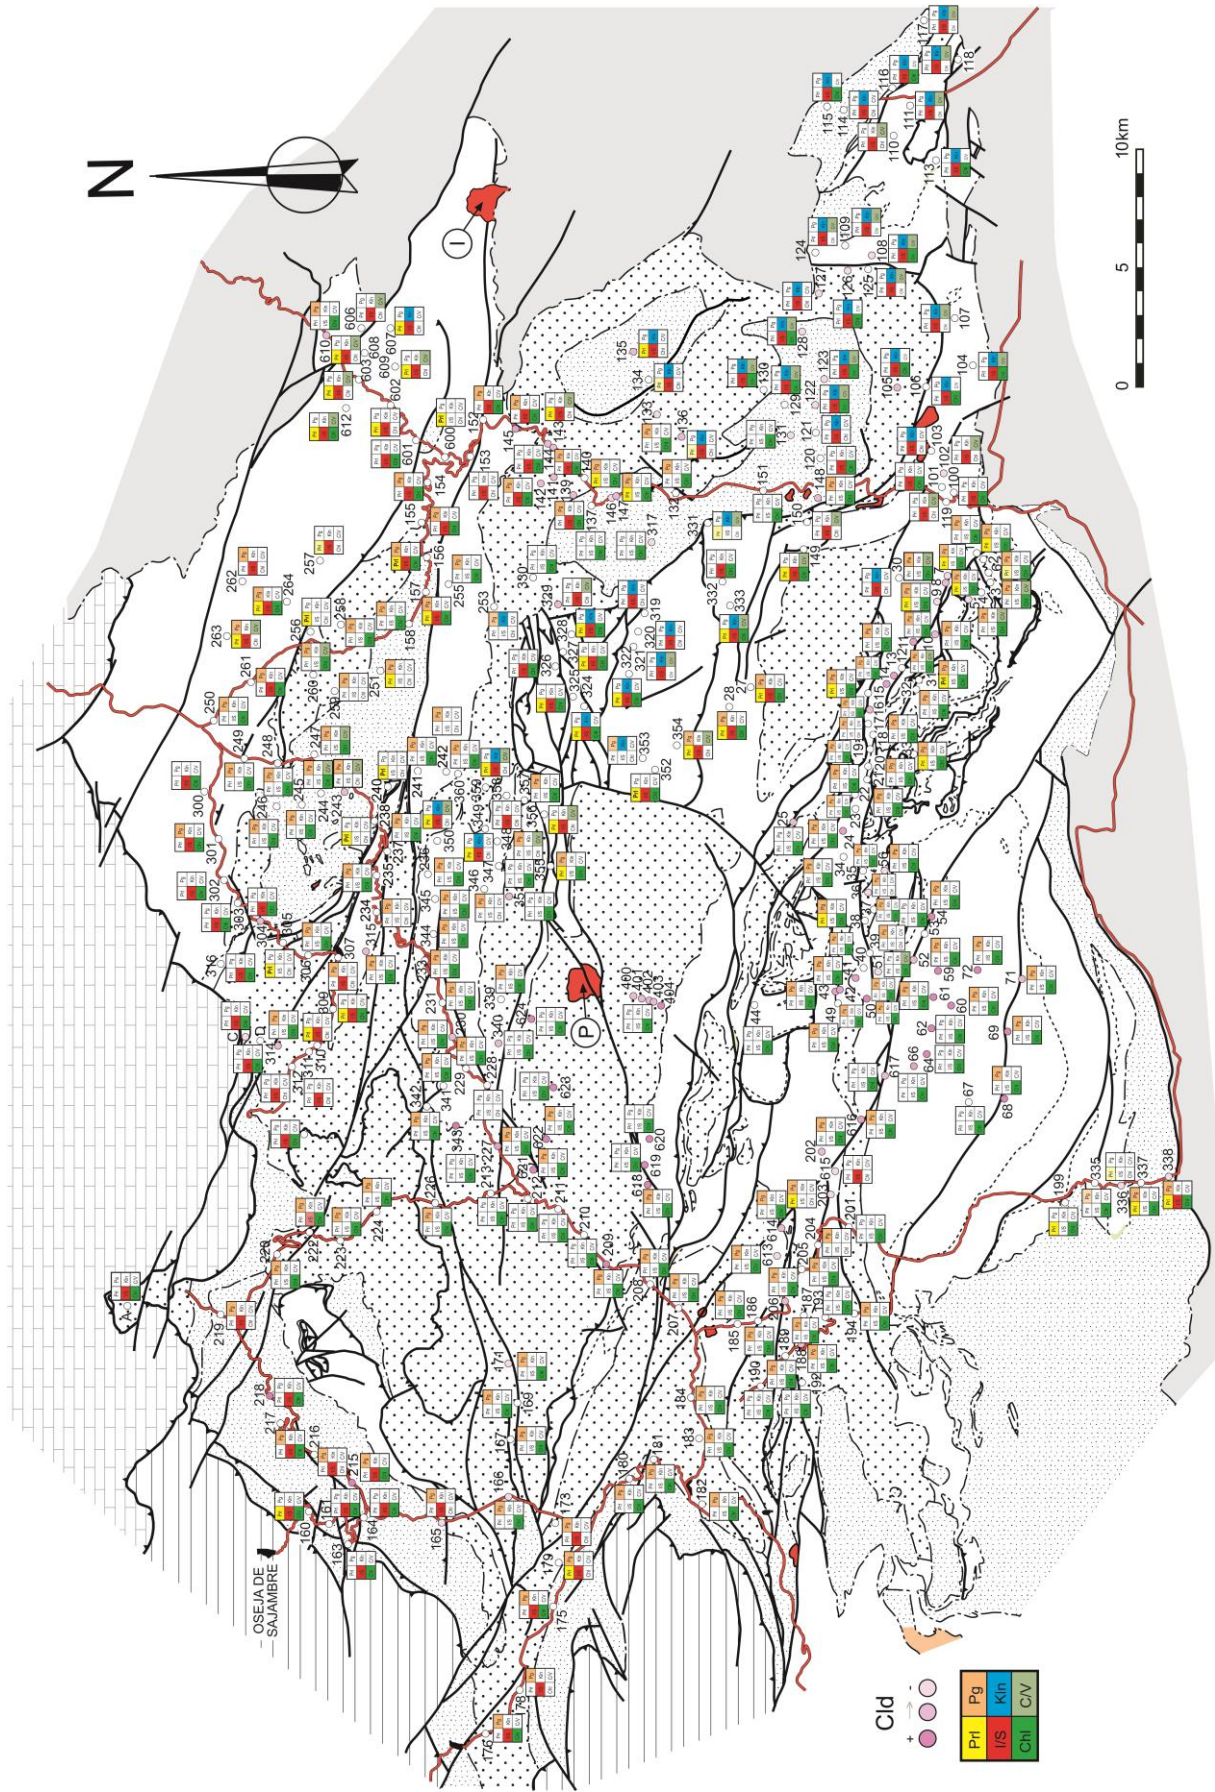

821 **Figure 5. Distribution of clay minerals in the study area. All the samples contain illite and therefore this**  
822 **phase has not been considered in the plot. Presence of a certain phase in the sample is indicated by the**  
823 **colour in the corresponding square. I, Pico Iján granodiorite; P, Peña Prieta granodiorite. For legend see**  
824 **Figure 8.**

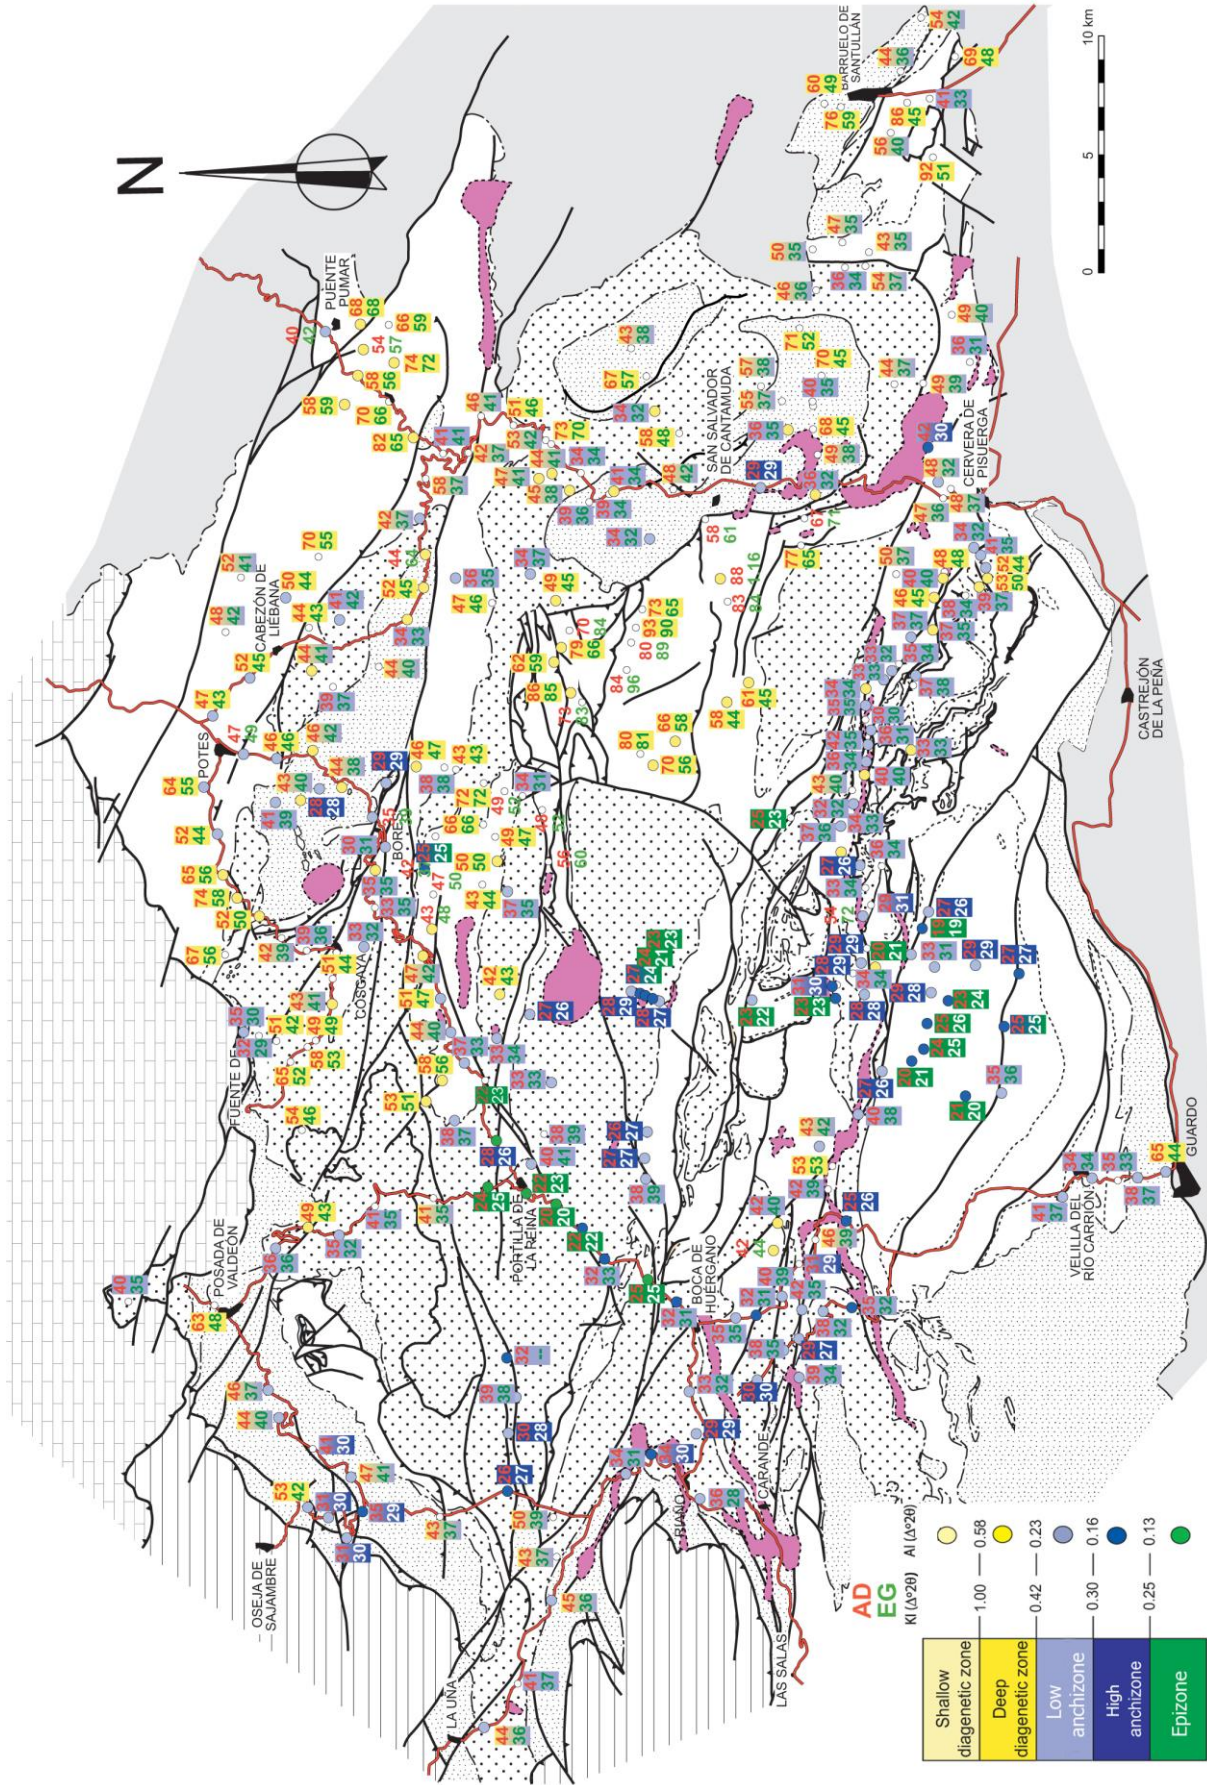

826 Figure 6. Map showing location of Kübler Index (KI) values (Kübler scale). Upper value, in red, air dried  
 827 sample; lower value, in green, sample treated with ethylene glycol. Árkai Index (AI) is indicated by the  
 828 colour of the sampling point. Values corresponding to samples with significant amounts of I/S, Prl and/or  
 829 Pg-Pg/Ms have not been highlighted with grade colours. Areas with small outcrops of intrusive rocks are  
 830 shadowed with purple colour. For legend see Figure 8.

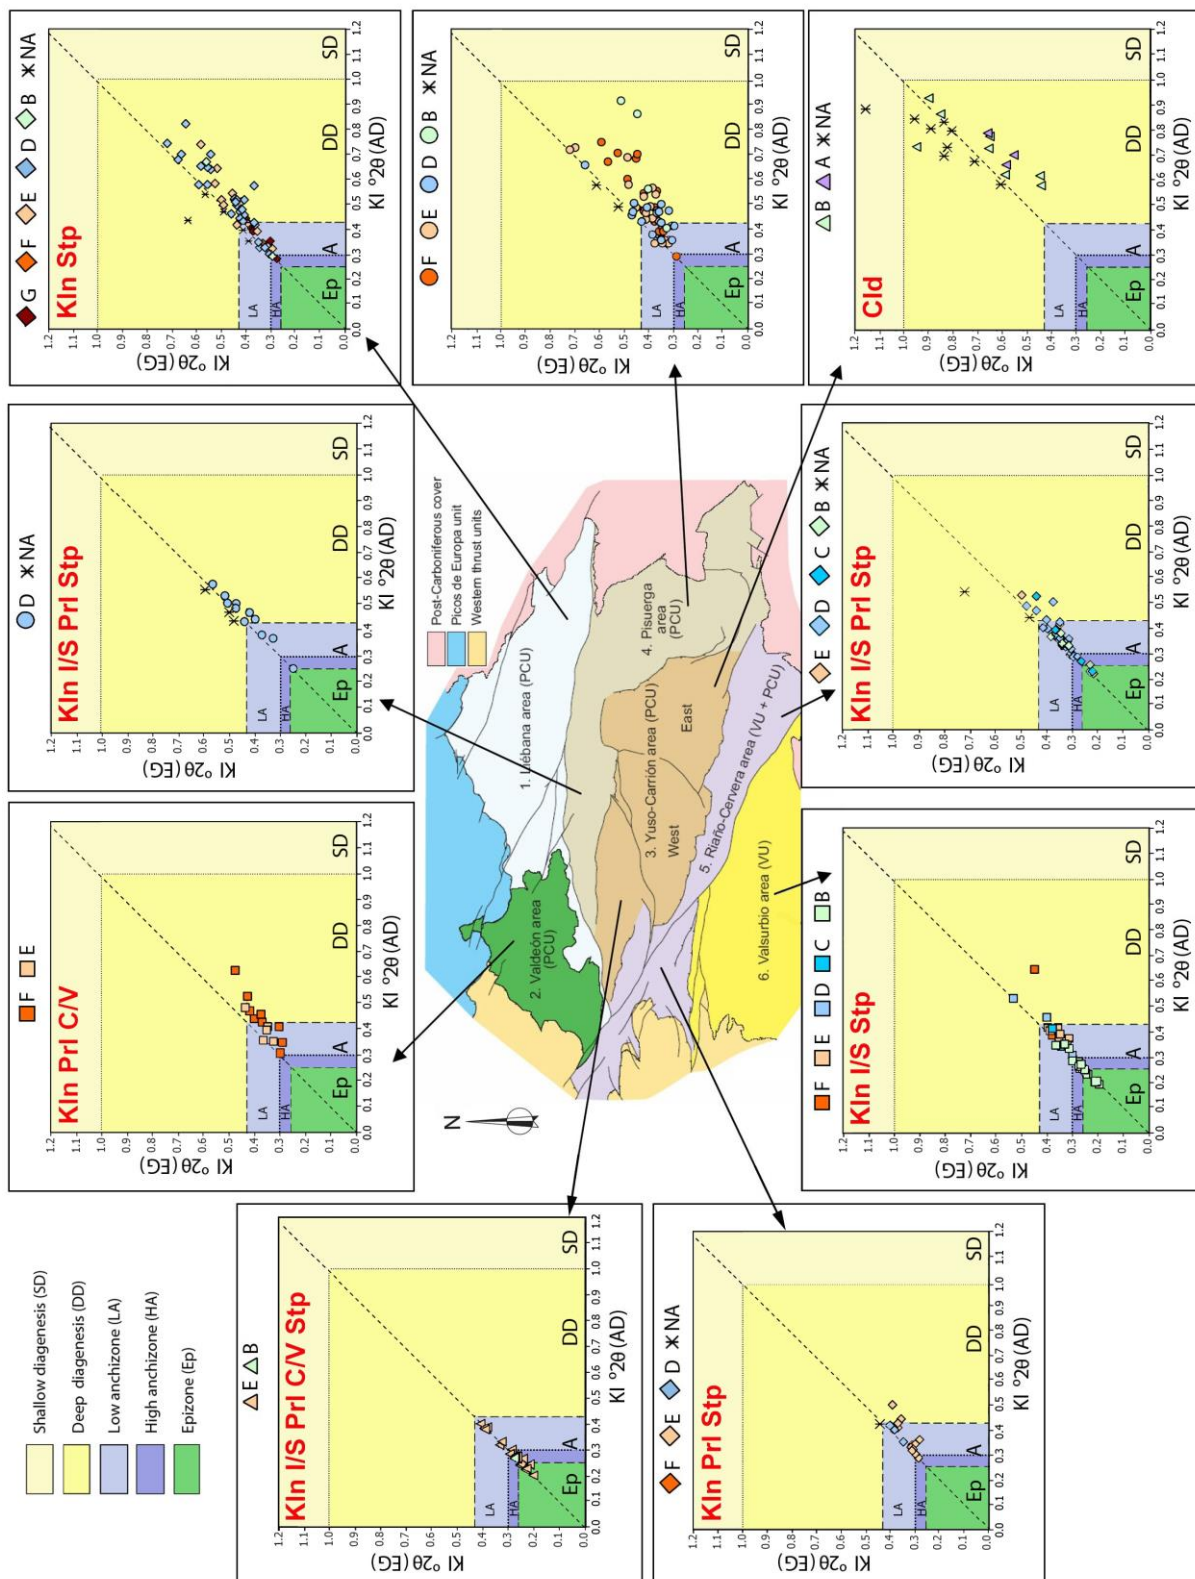

832 **Figure 7. Plot of Kübler Index (KI) measured on air dried (AD) versus KI measured on ethylene glycol**  
833 **solvated samples (EG), standardized at Kübler scale. DD, Shallow Diagenesis; LA, Low Anchizone; HA,**  
834 **High Anchizone; Ep, Epizone. Samples are plotted according to the areas outlined in Fig.4 and have been**  
835 **grouped following the divisions of Fig. 2: A, Silurian; B, Devonian; C, Tournasian-Visean; D, Prioro**  
836 **Group; E, Pando Group; F, Viorna Group; G, Campollo-Remoña Group. Samples with significant**  
837 **amounts of I/S,Pr1 and/or Pg-Pg/Ms are indicated as NA (not applicable). Minerals absent in each of the**  
838 **areas are indicated in red.**

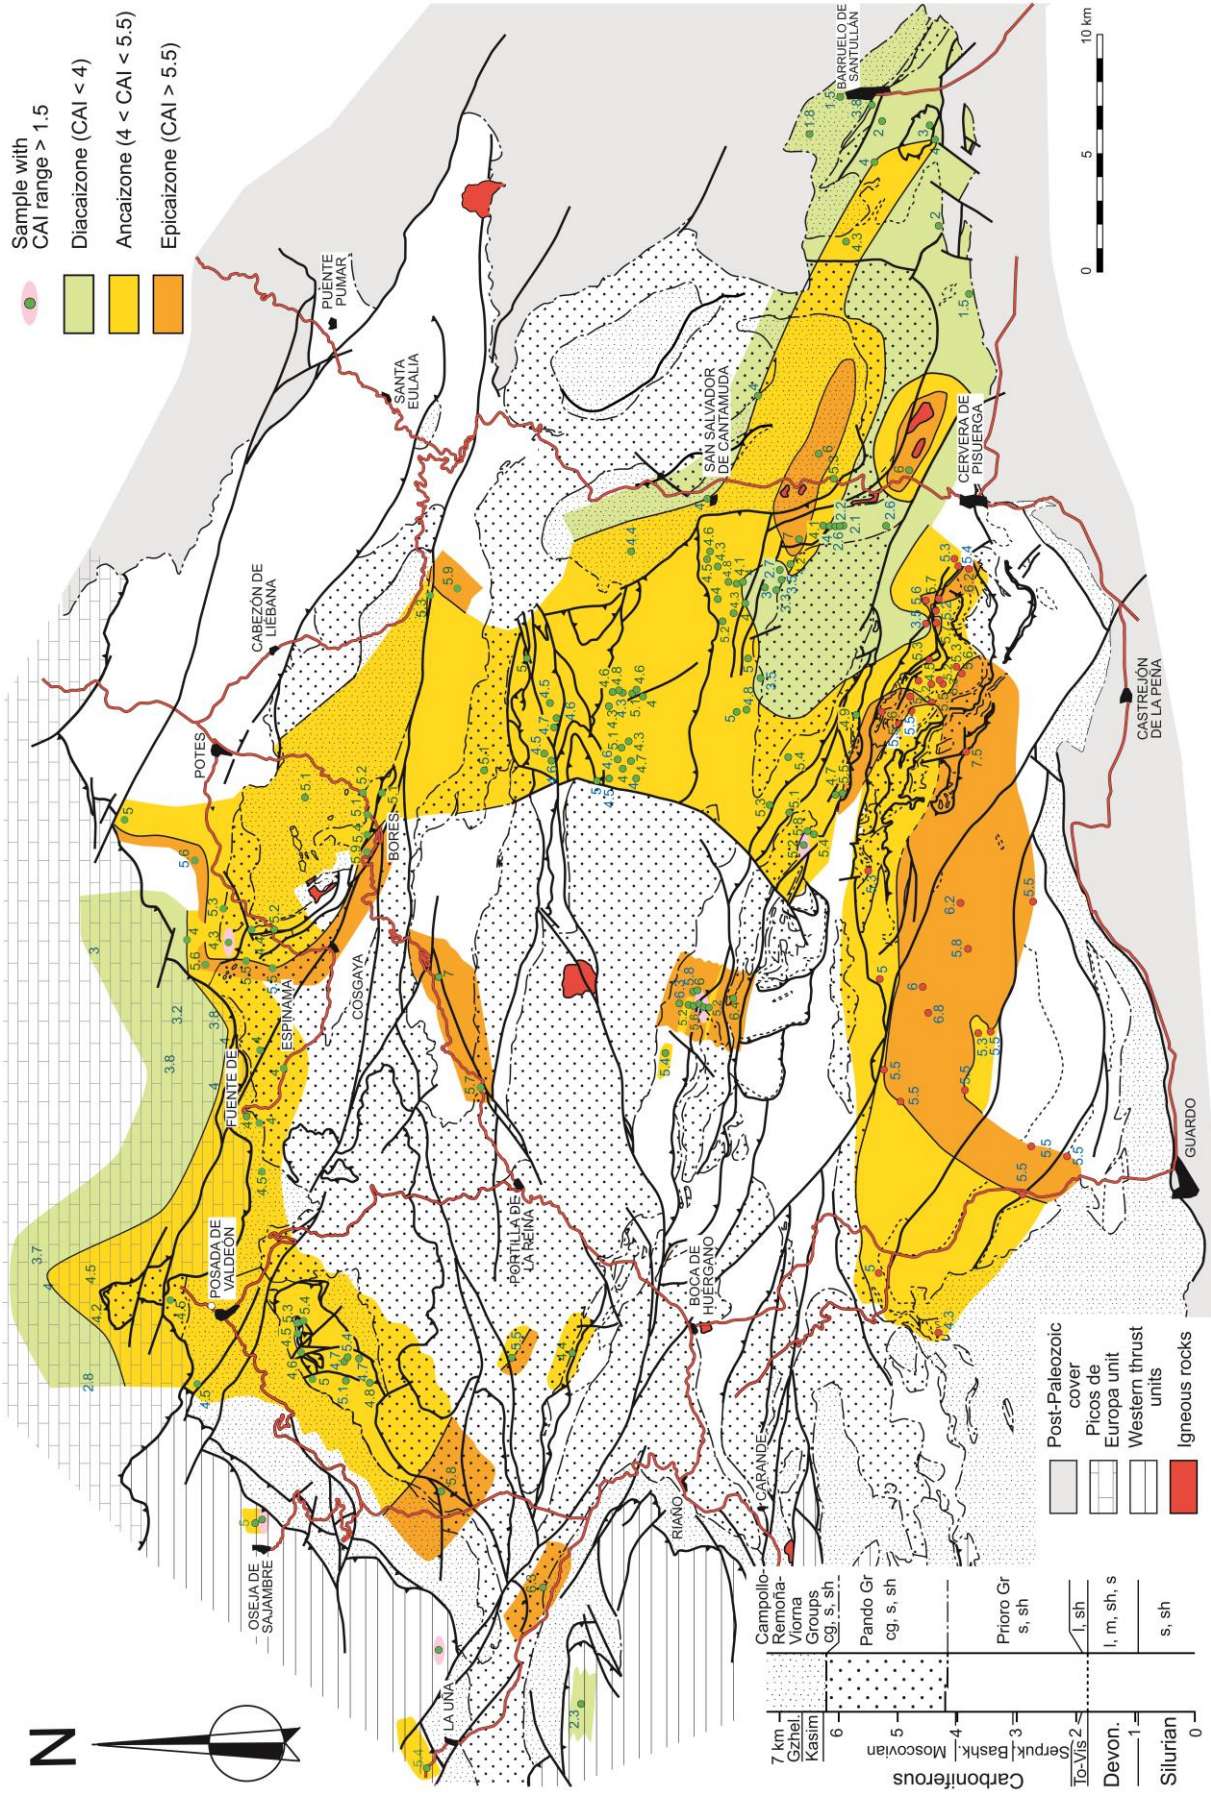



840 Figure 8. Map with location of CAI values and delimitation of CAI isogrades. Picos de Europa CAI data  
841 after Bastida et al., 2004; Valsurbio CAI data after García-López et al., 2013. Symbols of the CAI samples  
842 as in Fig. 2.

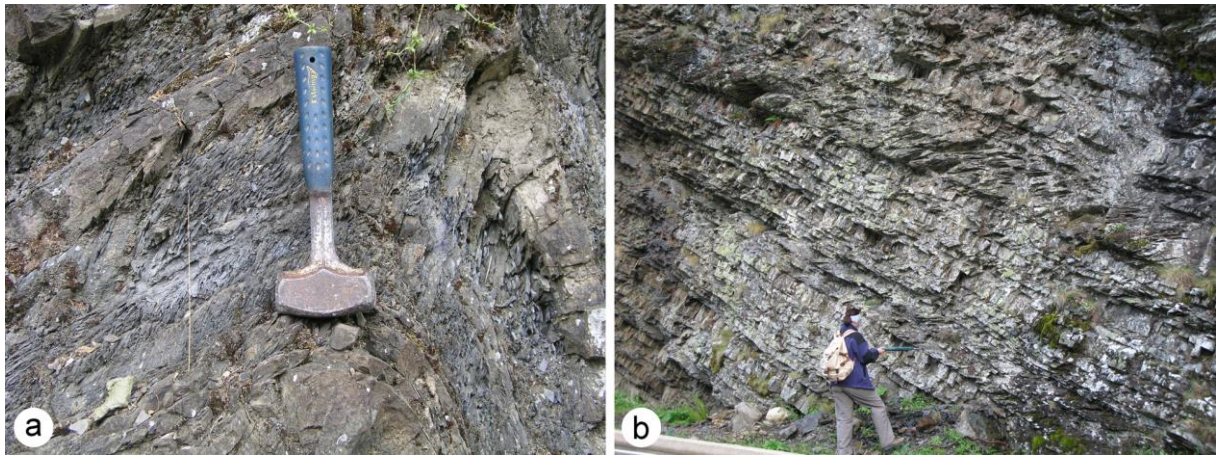

843  
844 Figure 9. (a)  $S_1$  cleavage associated with a nearly upright fold (eastern part of the Liébana area; north to  
845 the right). (b)  $S_2$  cleavage **dipping less than bedding** in a normal stratigraphic succession (Pando Group;  
846 Curavacas-Lechada syncline; north to the left).

847

848 **Appendices (Supplement)**

849 **Appendix 1.** Conodont colour alteration index (CAI) values and temperatures inferred from the CAI Arrhenius  
850 plot (Epstein et al., 1977; Rejebian et al., 1987). (V: Valsurbio samples; P: Pisuerga-Carrión samples; Po:  
851 Ponga samples; Pe: Picos de Europa samples).

852 **Appendix 2.** Containing:

853 1. Values of Kübler Index (KI) measured on air dried (AD) *versus* KI measured on ethylene glycol solvated  
854 samples (EG), standardized at Kübler scale. Samples are grouped according to the areas outlined in Fig. 4.  
855 Samples with significant amounts of I/S and Pg-Pg/Ms that have not been plotted in Figs 6 and 7 are indicated  
856 with Roman letter type of smaller size.

857 2. Árkai Index (AI) has been measured on air dried samples (AD).

858 3. Clay minerals present in the samples. Capitals and bold type indicate more abundance of the phase.

859

860

861

862
