# Supplementary material for: Tectonothermal evolution in the core of an arcuate fold and thrust belt: the southeastern sector of the Cantabrian Zone (Variscan belt, NW Spain)
Source: Copernicus journal article supplement (doi:10.5194/se-2016-53), 2016-04-04
Supplement: Supplementary file [file se-2016-53-RC1-supplement.pdf]

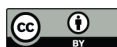

1 **Tectonothermal evolution in the core of an arcuate fold and**  
2 **thrust belt: the southeastern sector of the Cantabrian Zone**  
3 **(Variscan belt, NW Spain)**

4 M. L. Valín, S. García-López, C. Brime, F. Bastida and J. Aller

5 Departamento de Geología, Universidad de Oviedo, 33005 Oviedo, Spain

6 *Correspondence to:* Fernando Bastida (bastida@geol.uniovi.es)

7 **Abstract.** The tectonothermal evolution of an area located in the core of the Ibero-Armorican arc (Variscan belt)  
8 has been determined by using the conodont color alteration index (CAI), Kübler index of illite (KI), the Árkai  
9 index of chlorite (AI), and the analysis of clay minerals and rock cleavage. The area is part of the Cantabrian  
10 Zone (CZ), which represents the foreland fold and thrust belt of the orogen. It has been thrust by several large  
11 units of the CZ, what resulted in the generation of a large amount of synorogenic Carboniferous sediments. CAI,  
12 KI and AI values show an irregular distribution of metamorphic grade, independent of stratigraphic position.  
13 Two tectonothermal events have been distinguished in the area. The first one, poorly defined, is mainly located  
14 in the northern part. It gave rise to very low-grade metamorphism in some areas and it was associated with a  
15 deformation event that resulted in the emplacement of the last large thrust unit and development of upright folds  
16 and associated cleavage ( $S_1$ ). The second tectonothermal event gave rise to low-grade metamorphism and  
17 cleavage ( $S_2$ ) crosscutting earlier upright folds in the central, western and southern parts of the study area. The  
18 event continued with the intrusion of small igneous rock bodies, which gave rise to contact metamorphism and  
19 hydrothermal alteration. The second event was linked to an extensional episode due to a gravitational instability  
20 at the end of the Variscan deformation. This tectonothermal evolution occurred during the Gzhelian-Sakmarian.  
21 Subsequently, several hydrothermal episodes took place, in association with local development of crenulation  
22 cleavage during the Alpine deformation.

23 **1 Introduction**

24 The Variscan belt defines an arc in the northwestern Iberian Peninsula (Ibero-Armorican Arc), whose core is  
25 formed by the Cantabrian Zone (CZ), which represents the foreland fold and thrust belt of the orogen (Fig. 1).  
26 This zone consists of Palaeozoic rocks in which two tectonostratigraphic units have been distinguished (Julivert,  
27 1978; Marcos and Pulgar, 1982), whose limit is approximately located by the Devonian-Carboniferous  
28 boundary. The preorogenic unit is formed of Cambrian to Devonian rocks consisting of alternating carbonate and  
29 siliciclastic formations; they form a wedge that thins towards the foreland. The synorogenic unit is formed by  
30 several clastic units, also thinning towards the foreland, which filled foredeep basins generated in the front of the  
31 main thrust units of the CZ. In this zone, the Variscan deformation occurred during the upper Carboniferous and  
32 gave rise to thin-skinned tectonics, with several large thrust units and associated folds (Fig. 1); the units were  
33 emplaced in a sequence towards the foreland. The deformation occurred under shallow crustal conditions, so that  
34 diagenetic conditions are dominant in the zone and absence of cleavage in the rocks is also dominant.  
35 Nevertheless, there are several areas of the CZ where cleavage and very low- or low-grade metamorphism are

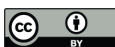

36 present. One of these areas is the southeastern sector of the Cantabrian Zone. It is a foreland basin that occupies  
37 the core of the Ibero-Armorican Arc, and has undergone, a complex history of sedimentation, deformation,  
38 metamorphism, and to a lesser extent, magmatism.

39 The present study aims to present a model of tectonothermal evolution for the core of the Ibero-Armorican  
40 arc based on conodont colour alteration index (CAI), the Kübler index (KI) of illite, the Árkai index (AI) of  
41 chlorite, the analysis of clay minerals and the rock cleavage development.

## 42 2 Geological setting

43 The southeastern sector of the Cantabrian Zone is made up of two units: the Pisuega-Carrión unit (PCU) and the  
44 Valsurbio unit (VU) (Fig. 1). As a consequence of its location in the core of the Ibero-Armorican arc, the PCU  
45 has been thrust over successively by the VU, the Central Coal Basin, the Ponga unit and the Picos de Europa  
46 unit, (Fig. 1). Thus, the PCU operated as a foreland basin during a great part of the history of the Variscan  
47 deformation. This history involved the accumulation of a great thickness of synorogenic Carboniferous  
48 sediments, corresponding to clastic wedges associated with the exhumation of the thrust units.

49 The VU is located to the south of the PCU. Marine facies occur in both units, but from the Emsian, the  
50 sediments in the latter unit were deposited in deeper waters than those in the former. The VU represents an  
51 extension of the southern part of the CZ, and presents a Devonian succession comparable to that of that part  
52 (Koopmans, 1962). The units containing Silurian-Devonian rocks located within the PCU have been interpreted  
53 as transported from internal areas of the orogenic belt, specifically from the southeastern extension of the  
54 Westasturian-Leonese Zone, currently hidden under the Mesozoic-Cenozoic cover of the Duero basin, and  
55 located to the south of the VU (Frankenfeld, 1983; Marquínez and Marcos, 1984; Rodríguez Fernández and  
56 Heredia, 1987; Rodríguez Fernández, 1994). These units were named 'Palentine nappes' by Rodríguez  
57 Fernández and Heredia (1987). The PCU and the VU are separated by the León fault (also called 'Ruesga fault'  
58 in the study area) (Fig. 2), that traverses most of the Cantabrian Zone and whose meaning is controversial (de  
59 Sitter, 1962; Marcos, 1968, 1979; Julivert et al., 1971; Kullmann and Schöenberg, 1978, 1979; Heward and  
60 Reading, 1980; Aller, 1986; Rodríguez Fernández and Heredia, 1988; Nijman and Savage, 1989; Rodríguez  
61 Fernández, 1991; Alonso et al., 2009, 2012).

62 The oldest sediments of the study area are Silurian (Wenlock-Pridoli) sandstones and lutites. The Devonian  
63 rocks consist of an alternation of carbonate and siliciclastic formations with the facies differences cited above.  
64 Mississippian rocks are mainly limestones in the lower part, especially in the VU; upwards a mostly turbiditic  
65 sequences appears with common olistoliths in the northern sector and some carbonate levels. The Pennsylvanian  
66 succession is dominantly siliciclastic, with a thickness of several thousand meters and synorogenic character. In  
67 relation to this synorogenic sedimentation, several syntectonic unconformities have been described, among  
68 which the Curavacas unconformity (early Moscovian) can be highlighted by its structural significance (Van  
69 Veen, 1965; Lobato 1977; Alonso and Rodríguez Fernández, 1983; Martín-Merino et al., 2014).

70 The first deformation events were pre-Curavacas (prior to or earliest Moscovian) and involved the  
71 emplacement of the Palentine nappes and the VU. Two generations of thrusts occurred during this episode  
72 (Rodríguez Fernández, 1994), which translated sequences northwards. Further, some back thrusts and normal  
73 faults occurred. Folds associated with the thrusting also formed during this episode.



74 The post-Curavacas deformation events involved the development of several generations of thrusts and  
75 high-angle reverse faults, folds, cleavages and normal faults. Some thrusts have a trend approximately parallel to  
76 the basal thrust of the Ponga unit and are probably related to the emplacement of this thrust unit (Rodríguez  
77 Fernández and Heredia, 1987), which occurred during the late Moscovian. In the same episode that involved the  
78 emplacement of the Picos de Europa thrust unit during the Kasimovian-Gzhelian (Merino-Tomé et al. 2009), N –  
79 S shortening occurred in the study area, involving the development of thrusts, high angle reverse faults and the  
80 reactivation of older faults with a movement dominantly southward (Maas, 1974). In addition, upright folds with  
81 E – W axial trace developed; among them, the Curavacas-Lechada syncline is remarkable for its notable  
82 dimensions (Savage, 1967; Lobato, 1977; Rodríguez Fernández, 1994).

83 Several cleavages have been recognised in the study area. Among them, a gently dipping cleavage  
84 crosscutting folds is the most relevant and has been described by various authors (Van Veen, 1965; Savage,  
85 1967; Lobato, 1977; Van der Pluijm and Kaars-Sijpesteijn, 1984; Van der Pluijm et al., 1986; Rodríguez  
86 Fernández, 1994, 2001; García-López et al., 1999, 2007; Marín, 1997; Bastida et al., 2002).

87 A subsequent N-S shortening episode occurred during the Alpine deformation. It involved tightening of  
88 folds, local development of crenulation cleavage and reactivation of some faults. It is responsible for the dome  
89 geometry of the VU (Marín et al., 1995; Marín, 1997). Another post-Variscan structure of the study area is the  
90 Ventaniella fault, which traverses the whole Cantabrian Zone in a NW – SE direction. It is essentially a dextral,  
91 strike-slip fault with a net-slip of 4-5 km (Julivert et al., 1971) whose activity began in the Permian and  
92 continues to the present (López-Fernández et al., 2002, 2004).

93 Outcrops of intrusive igneous rocks are common in the PCU, and their knowledge is important to  
94 understand the tectonothermal evolution of this unit. Among these rocks, three granodioritic stocks (Pico Iján,  
95 Peña Prieta and Pico Jano; Fig. 2) and many small outcrops can be distinguished. The latter are mainly  
96 concentrated in the southern half of the unit.

97 The stocks of Pico Iján, Peña Prieta and Pico Jano dominantly have granodioritic composition and their  
98 intrusion was favoured by the existence of faults (Suárez and García, 1974; Corretgé and Suárez, 1990), having  
99 developed a notable aureole of contact metamorphism in the case of the Peña Prieta stock. The porphyroblasts in  
100 this aureole are post-tectonic relative to the gently dipping cleavage (Gallastegui et al., 1990; Rodríguez  
101 Fernández, 1994). The large number of small outcrops of igneous rocks that exist in the southern half of the unit  
102 are concentrated in two areas (one in the eastern part and another in the western part) joined by a band whose  
103 outcrops of igneous rocks have been related to the León fault (Corretgé et al., 1987; Suárez and Corretgé, 1987;  
104 Corretgé and Suárez, 1990). All these southern outcrops have been in general related to fractures and appear as  
105 small stocks, probably apophyses of bigger bodies in depth, and as sills or dikes. Their composition is varied and  
106 ranges from granodioritic to gabbroic. In some cases, they developed ore bodies close to their contacts (Martín-  
107 Izard et al., 1986).

108 Earlier metamorphic studies in the Cantabrian zone using CAI and/or KI methods have shown the existence  
109 of areas with very low- or low-grade metamorphism in the PCU and the VU (Raven and van der Pluijm, 1986;  
110 Keller and Krumm, 1993; Marín et al., 1996; Marín, 1997; Köberle et al., 1998; García-López et al., 1999, 2007,  
111 2013; Bastida et al., 2002; Clauer and Weh, 2014; among others). Similar results have been obtained for the  
112 southern part of the study area using coal rank and vitrinite reflectance (Colmenero and Prado, 1993; Llorens et  
113 al., 2006; Colmenero et al., 2008; Clauer and Weh, 2014). This metamorphism has been described as associated

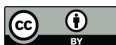

114 with a late-orogenic extensional event and to the corresponding cleavage (García-López et al., 1999, 2007, 2013;  
 115 Bastida et al., 2002). Analysis of ore deposits and of the tectonothermal evolution in the neighbouring unit of the  
 116 Picos de Europa has defined a subsequent hydrothermal episode during the Permian (Gómez-Fernández et al.,  
 117 1993, 2000; Bastida et al., 2004). Brime and Valín (2006) have suggested a hydrothermal origin for mineral  
 118 associations with chloritoid and pyrophyllite found in samples of pelitic rocks collected in the study area. K-Ar  
 119 dating of illite in samples collected in the southern part of the study area, identified four thermal episodes (Clauer  
 120 and Weh 2014), namely at: (1)  $293 \pm 3$  Ma (Cisuralian), (2)  $268 \pm 6$  Ma (Guadalupian), (3)  $243 \pm 5$  Ma (middle  
 121 Triassic), and (4)  $175 \pm 6$  Ma (early-middle Jurassic). From apatite fission tracks and zircon (U-Th)/He ages in  
 122 samples of Westphalian (Bashkirian-Moscovian) sandstones collected in the eastern part of the PCU, Fillon et al.  
 123 (2012) obtained ages of cooling below  $\approx 180^\circ\text{C}$  of 37-39 Ma and below  $\approx 110^\circ\text{C}$  of 28-29 Ma. They inferred  
 124 Cenozoic erosion of a rock thickness between 6.4 and 8 km (assuming a steady-state geothermal gradient of  
 125  $25^\circ\text{C km}^{-1}$ ).

## 126 3 Methods

### 127 3.1 X-ray diffraction

128 A total of 297 mudrocks from various localities (Fig. 2) were studied by X-ray diffraction (XRD) analysis in  
 129 order to determine their phyllosilicate mineralogy, Kübler Index (KI) of illites, and Árkai Index of chlorites (AI).  
 130 Preparation of samples and methods for XRD analysis follow the methods described in Brime et al. (2003)

131 Reaction progress in illitic minerals (*sensu* Środoń 1984) has been widely used to assess the evolution of  
 132 pelitic lithologies during diagenesis and low-grade metamorphism. Prograde changes can be identified by use of  
 133 the Kübler Index technique (illite “crystallinity”, see Guggenheim et al. 2002) involving quantification of the  
 134 width of the  $10\text{Å}$  peak of illite. This is an indirect measure of lattice reorganization and thickening of illite  
 135 crystals (Kisch 1983; Merriman and Peacor 1999) with increasing grade. The Kübler Index (KI) is expressed in  
 136  $\Delta^\circ 2\theta$  to minimize variations caused by differences in recording conditions. For this study the KI was measured  
 137 using a laboratory procedure similar to that outlined by the IGCP 294 working group (Kisch, 1991). The  
 138 numerical KI value decreases with improving “crystallinity” and is expressed as small changes in the Bragg  
 139 angle  $\Delta^\circ 2\theta$ , using Cu  $K\alpha$  radiation.

140 The transient zone between diagenesis and metamorphism (the anchizone of Kübler, 1967) is defined by KI  
 141 values between  $0.42^\circ$  and  $0.25^\circ \Delta^\circ 2\theta$  respectively (Kisch, 1991). The values obtained in our laboratory were  
 142 correlated with the Kübler scale using a calibration curve based on data obtained from polished slate standards  
 143 kindly provided by H. Kisch. The diagenetic zone has been subdivided in shallow ( $KI > 1^\circ \Delta^\circ 2\theta$ ) and deep ( $1.0^\circ$   
 144  $> KI > 0.42^\circ \Delta^\circ 2\theta$ ), using the terms proposed by the IUGS Subcommittee on the Systematics of Metamorphic  
 145 rocks (Árkai et al., 2007). Following Merriman and Peacor (1999) we have divided the anchizone into low ( $0.42$   
 146  $< KI < 0.30^\circ \Delta^\circ 2\theta$ ) and high ( $0.30 < KI < 0.25^\circ \Delta^\circ 2\theta$ ).

147 Crystallinity index standards (CIS, Warr and Rice 1994) have also been used to compare the results thus  
 148 obtained with other published results using that scale. KI values obtained in this work could be converted to the  
 149 CIS scale by using the calibration equation:

$$150 \text{KI}_{\text{CIS}} = 1.505\text{KI}_{\text{this work}} - 0.046 \quad (R^2 = 0.996). \quad (1)$$

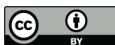

151 For the problems involved in the use of the CIS scale to assess metamorphic grade see Brime (1999) and  
152 Kisch et al. (2005).

153 The KI method does not allow temperature constraints to be placed on the upper and lower boundaries of  
154 the anchizone and it is more likely to be a measure of reaction progress than of the thermodynamic equilibrium  
155 achieved (Essene and Peacor, 1995). However, this method, in combination with others such as fluid inclusions  
156 or reflectance of carbonaceous material, indicates that the transition diagenesis–anchizone could be correlated  
157 with a temperature of  $230 \pm 10$  °C whereas the limit anchizone–epizone would be at  $300 \pm 10$  °C (Müllis, 1979;  
158 Frey et al., 1980; Frey, 1987; Von Gosen et al., 1991; Müllis et al., 1995; Merriman and Frey, 1999; Ferreiro  
159 Mählmann et al. 2002; Müllis et al. 2002).

160 The presence of illite/smectite (I/S) and paragonite (Pg) and paragonite/muscovite (Pg/Ms) hampers  
161 determination of KI of many samples. However, pro-grade changes can also be identified by use of the Árkai  
162 Index technique (of chlorite “crystallinity”, see Guggenheim et al., 2002) involving quantification of the width of  
163 the  $14\text{Å}$  or  $7\text{Å}$  peaks of chlorite (Árkai, 1991, Meunier, 2005). The Árkai Index (AI) was determined in the (002)  
164 peak using the same instrumental conditions as that for KI measurements. The anchizone limits have been  
165 established using samples free of I/S, Pg-Pg/Ms in which the KI measured in the air dried samples has been  
166 calibrated with Kisch standards. The AI was measured in the same samples and the regression line obtained  
167 allowed the delimitation of the upper and lower anchizone limits using chlorite for AI values of 0.234 and 0.135  
168  $\Delta^{\circ}2\theta$  respectively. It should be noted that AI values are smaller than the corresponding KI and the method is  
169 therefore slightly less sensitive than KI method.

### 170 3.2 Conodont colour alteration index (CAI).

171 Colour changes in conodont elements are related to the progressive and irreversible alteration of the amounts of  
172 organic matter within their apatite composition. The CAI method is based on analysis of the colour changes that  
173 the conodonts undergo in response of the organic matter to a temperature increase with time. These changes  
174 permit construction of a scale of CAI values with eight units that allows the use of the conodonts as maximum  
175 paleothermometers for a temperature interval of between 50 and 600°C (Epstein et al., 1977; Rejebian et al.,  
176 1987). It is used mainly in carbonate rocks. Besides colour changes, apatite textural alteration also takes place  
177 and can provide complementary information about the thermal conditions. In the present paper the terminology  
178 of Rejebian et al. (1987) and García-López et al. (1997, 2006) is used for the textural description of conodonts.  
179 In agreement with Rejebian et al. (1987), well preserved conodonts and high CAI values with a wide dispersion  
180 are indicative of contact metamorphism. Furthermore, coarse recrystallization and corrosion are related to  
181 hydrothermal processes.

182 Samples were collected from the Pisuerga-Carrión and Valsurbio units. CAI values are based on 5 kg  
183 samples of limestone that were treated, with 6% acetic acid solution. Unfortunately, recovery of conodonts from  
184 Carboniferous rocks was hindered in some areas by their dominantly siliciclastic character. Sampling was  
185 complemented with specimens from collections housed at the University of Oviedo (Spain) and those of the  
186 National Museum of Natural History at Leiden (Netherlands) and Institut und Museum für Geologie und  
187 Paläontologie in Göttingen (Germany) (Fig. 2). 213 positive samples, corresponding to an age interval from the  
188 Pridoli to Ghzelian, were analyzed for CAI determination (Appendix 1 in the supplementary material).



189 The methodology involved in CAI determination can be found in García-López et al. (1997) and Bastida et  
190 al. (1999). Several CAI values were obtained from most samples and the mean of CAI values have been  
191 determined for each of them in order to tentatively contour CAI values. Samples with a range higher than 1.5  
192 have not been used to obtain mean CAI values and temperatures. The interpretation of the results is mainly based  
193 on the analysis of the CAI isograds and their relationship to the stratigraphic contacts and the main structures of  
194 the study area.

195 For the metamorphic zonation from CAI data, we use the terminology described by García-López et al.  
196 (2001), that involves a division in diacaizone ( $CAI < 4$ ), ancaizone ( $4 \leq CAI \leq 5.5$ ) and epicaizone ( $CAI > 5.5$ ).

197 Temperature ranges of the CAI values were obtained from the Arrhenius plot presented by Epstein et al.  
198 (1977) and Rejebian et al. (1987). The maximum heating time is the age of the rock. Nevertheless, it is possible  
199 to place greater limits on this maximum time (García-López et al., 2013). According to the Arrhenius plot a  
200 minimum temperature is required to obtain a specific CAI value. For example, in a rock with an age of 400 Ma  
201 (Devonian), development of  $CAI = 5$  requires at least  $290^{\circ}\text{C}$  (point A in Fig. 3). Then, it can be assumed that a  
202 temperature  $< 290^{\circ}\text{C}$  does not contribute to generate a  $CAI = 5$ . Hence, to produce a given CAI, the maximum  
203 time of heating begins when the rock reaches the minimum temperature necessary to produce that CAI, and it  
204 ends when the rock cools down and the temperature becomes lower than this minimum value. According to  
205 García-López et al. (2013), and in agreement with the age of the metamorphism analyzed below, we consider  
206 that the main heating time corresponds to a late-Variscan period that began at the boundary Kasimovian-  
207 Gzhelian and ended at the beginning of the Triassic (heating time of about 50 Ma). The hydrothermal post-  
208 Variscan episodes described by Clauer and Weh (2011) and the most recent heating (mainly Cenozoic) described  
209 by Fillon et al. (2012) probably lasted less than 50 Ma. If there are rocks within the area that underwent more  
210 than one heating period, the period to be considered for the development of the CAI is the one which generated  
211 higher temperatures. Anyway, due to the geometry of the CAI curves in the Arrhenius plot, for heating intervals  
212 such as those involved in the present case, an error of a few Ma in the maximum time of heating has little  
213 influence on the results. According to Patrick et al. (1985) and Rejebian et al. (1987) the minimum time of  
214 heating assumed here is of 1 Ma.

### 215 3.3 Cleavage

216 Development of cleavage requires ductile deformation of rocks and mineralogical and microstructural changes,  
217 involving mechanisms, such as pressure solution, which require a minimum temperature of about  $200^{\circ}\text{C}$  for  
218 cleavage development in pelitic rocks and  $175^{\circ}\text{C}$  in limestones (Groshong et al. 1984). Thus widespread  
219 presence of cleavage occurs below a certain crustal level (minimum overburden of 5-7 km; Engelder and  
220 Marshak, 1985). Furthermore, the relations between folds and cleavages and the overprinting relations between  
221 cleavages, play an important role in defining deformation events (Passchier and Trouw, 2005). In addition,  
222 cleavage is also a key structure to establish chronological relations between metamorphic crystallization and  
223 deformation. In the context of the study area, we call tectonothermal event to a deformational event with  
224 cleavage development and associated metamorphic conditions, and use the term thermal event for metamorphic  
225 conditions without cleavage development. Hence, cleavage is considered here as the main reference to ascertain  
226 the tectonothermal events of the study area.

## 227 4 Results and interpretation

228 In order to facilitate description, the samples have been grouped in the following areas, namely Liébana,  
 229 Valdeón, Yuso-Carrión, Pisuerga, Riaño-Cervera and Valsurbio (Fig. 4) (Martín-Merino et al., 2014).

### 230 4.1 Clay minerals

#### 231 4.1.1 Clay mineral assemblages

232 Mineralogical analysis of the <2 μm fractions shows that dioctahedral K- rich mica-like structures (referred to as  
 233 illite or muscovite, I-Ms) is present in all the samples with the majority containing also chlorite (Chl) (Fig. 5).  
 234 Chlorites have poorly developed 14 Å peaks, indicating high iron content suggestive of chamositic compositions  
 235 (Moore and Reynolds, 1997). Other phases such as ordered illite/smectite (I/S) or paragonite (Pg) and mixed  
 236 layers paragonite/muscovite (Pg/Ms) are also common. Asymmetry of peaks and sample behaviour after  
 237 glycolation indicate the presence of ordered illite/smectite (I/S). Absence of random I/S indicate that zone 3 of  
 238 Eberl (1993) has been reached, suggesting that temperatures exceeded 100°C. Kaolinite (Kln) and pyrophyllite  
 239 (PrI) may also be present in some samples and are abundant in a few samples. In addition, chloritoid (Cld) is also  
 240 present and widespread in the study area. However it is more abundant in samples close to the intrusions and/or  
 241 faults in which case is found together with chlorite and Pg + Pg/Ms. Only in samples to the E (Pisuerga Area),  
 242 where it is not as abundant, it may be associated with PrI, Kln or I/S. Finally chlorite/vermiculite mixed  
 243 layer (C/V) and stilpnomelane (Stp) have been found, in small amounts, in a few samples, and are restricted to  
 244 samples to the E Pisuerga and E Yuso-Carrión areas.

245 The I/S is more abundant to the N and E (Valdeón, **Liébana**, and eastern part of the Pisuerga and Yuso-  
 246 Carrión areas) and Kln presence is almost restricted to samples to the E (Pisuerga and eastern part of the Yuso-  
 247 Carrión areas). PrI is common in samples from the central and northeastern parts (**Liébana** and Pisuerga areas,  
 248 and eastern part of the Yuso Carrión area) (Fig. 5). Quartz, calcite, feldspars and goethite were accessory phases  
 249 recognized in some samples.

250 In general the assemblages found are, in order of abundance of the most frequent phase besides illite (n =  
 251 291):

252 I + **Chl** (n = 215) ± Pg ± Pg/Ms ± Cld ± I/S ± [C/V] ± [PrI] ± [Kln] ± [Stp]

253 I + **Pg + Pg/Ms** (n = 162) ± Chl ± Cld ± [I/S] ± [PrI] ± [C/V] ± [Kln] ± [Stp]

254 I + **I/S** (n = 12) ± Chl ± Kln ± PrI ± C/V ± Pg ± Pg/Ms ± C/V ± [Cld] ± [Stp]

255 I + **Cld** (n = 93) ± Chl ± Pg ± Pg/Ms ± I/S ± [C/V] ± [PrI] ± [Kln] ± [Stp]

256 I + **PrI** (n = 56) ± I/S ± Chl ± Pg ± Pg/Ms ± C/V ± [Cld] ± [Kln] ± [Stp]

257 I + **C/V** (n = 48) ± I/S ± Chl ± Pg ± Pg/Ms ± Kln ± PrI ± Cld ± [Stp]

258 I + **Kln** (n = 39) ± I/S ± Chl ± C/V ± [PrI] ± [Cld] ± [Pg] ± [Pg/Ms] ± [Stp]

#### 259 4.1.2 Kübler Index

260 As mentioned above, determination of KI has been hampered by the presence in some samples of certain types  
 261 of I/S and big amounts of Pg or PrI, in relation to the amount of illite, that interfere with the 001 peak of illite,



262 therefore rendering their KI values useless for grade determination using KI, even in the glycolated state. As a  
263 result, 23 (indicated in *italics* in Appendix 2 in the supplementary material) of the 291 samples studied yielded  
264 doubtful KI values (Figs. 6, 7; Appendix 2 in the supplementary material). They are given, nevertheless, as they  
265 indicate maximum value of the KI.

266 Grade ranges from deep diagenetic to epizonal, but deep diagenetic and mainly low anchizonal metapelites  
267 are predominant in most of the areas (Figs. 6 and 7). Expandability of the 10 Å peak is only lost at the high  
268 anchizone to epizone boundary. Deep diagenetic areas can be found to the north (Liébana and Valdeón areas).  
269 The Riaño-Cervera area is mainly low anchizonal with a few samples being diagenetic or deep anchizonal. In the  
270 Pisuega area, the grade ranges from deep diagenetic to low anchizonal (Figs. 6, 7). Higher grade (epizonal)  
271 samples may appear in any formation and they are more abundant in the western part of the Yuso-Carrión area,  
272 where a big size intrusion is located, and in the Devonian of the Valsurbio area (Fig.7). In both cases, it is in  
273 those high grade samples where chloritoid is more abundant (Fig.6).

274 Work in progress on the variation of the chemical composition of the phyllosilicates of the study area  
275 allowed estimation of temperatures using Battaglia's (2004) approach based in the variation in the chemical  
276 composition of illites. Temperatures obtained are in the range 230-280°C, consistent with the anchizonal KI  
277 values of the analyzed samples. The observed deficit in layer charge (Brime and Valín, 2006) is characteristic of  
278 anchizonal K white micas (Hunziker et al 1986; Livi et al. 1997; Merriman and Peacor 1999; Árkai 2002; Árkai  
279 et al 2003).

#### 280 4.1.3 Árkai Index

281 It has been measured in 118 samples, most if not all of them, containing various amounts of I/S and/or Pg,  
282 Pg/Ms. Of them, 40 yielded diagenetic values, 63 low anchizonal values, 14 high anchizonal values and just one  
283 epizonal value. Distribution of these values can be seen in Fig. 6. In those cases in which KI and AI have been  
284 determined, the correlation of the grade indicated by both indices is good ( $r = 0.65$ ; significance level 0.1%  $r_{60} =$   
285 0.41) suggesting that both phases were formed under the same conditions, and supporting the reliability of the AI  
286 as indicator of grade in those cases in which it is the only index available (Árkai et al., 1995).

287 The existence of some discrepancies between KI and AI may be caused by the presence of small amounts  
288 of I/S or Pg that alters the width of the illite peaks. However, those discrepancies are always small and are  
289 usually in samples at the boundary between metamorphic grade zones (Appendix 2 in the supplementary  
290 material).

#### 291 4.1.4 Mineral distribution in relation with grade

292 Kaolinite is present in deep diagenetic samples and also in some low anchizonal ones. Maximum stability of Kln  
293 is 270°C, according to laboratory experiments (Velde, 1992) and therefore in agreement with its presence in the  
294 anchizonal samples. Paragonite, apart from its presence in deep diagenetic samples, is more frequently present in  
295 the anchizone and some epizonal samples (Figs. 5 and 6). Pyrophyllite is more abundant in samples from the  
296 anchizone but it can also be present in diagenetic samples.

297 The widespread occurrence of Kln and quartz in the diagenetic rock samples may provide the starting  
298 material for the formation of Prl by the reaction

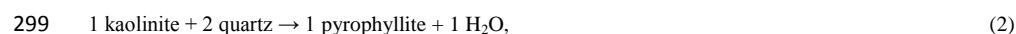





300 as suggested in the Glarus Alps by Frey (1978), who considered Prl an indicator of anchizone regional  
301 conditions. In fact of the 53 samples in which Prl is present, Kln is found, and in very small amounts, in only 8  
302 of them. However, the stability field of Prl is strongly influenced by water activity, and thus the formation  
303 temperature could be notably lower (Thompson, 1970; Winkler, 1979; Hemley et al., 1980). Its presence in  
304 diagenetic samples is not uncommon and could be due to the influence of magmatic fluids (Hosterman et al., 1970;  
305 Kisch, 1987). According to Kisch (1987) Prl, appears in regional terrains only in the anchizone but in areas of  
306 intrusive activity it may appear in lower grade zones. Therefore presence of Prl in samples with diagenetic KI/AI  
307 values, as in the eastern part of the Liebana and Yuso Carrión areas, could be regarded as evidence for high  
308 geothermal gradients or magmatic heating.

309 Chloritoid is abundant in samples from the high anchizone to epizone (southeastern Valsurbio area and  
310 western Yuso Carrión area), but it can also be present, in smaller amounts, in low anchizone (1, 3W, 4E, 4W,  
311 5E, 5W) and even diagenetic samples (eastern Liébana, Pisuerga and Riaño-Cervera areas). Cld is Fe rich. The  
312 average  $Mg/(Fe+Mg)$  found is  $< 0.12$  (Brime and Valín, 2006) similar to that of pelites subjected to intermediate  
313  $P/T$  conditions. It is noteworthy that when this phase is present in the samples (a total of 93 samples have Cld),  
314 Prl is absent, or in very minor amounts in a few samples (ten in total), indicating that it could have been formed  
315 according to the reaction originally proposed by Zen (1960), which is generally accepted for the formation of  
316 Cld during metamorphism of aluminous pelites (Theye et al. 1992):

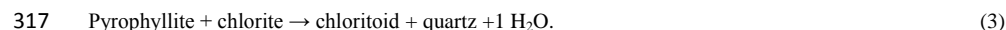

318 The absence of Cld in the eastern part of the Yuso Carrión area where Prl is abundant, together with Chl,  
319 could indicate that the temperature required for its formation by reaction (3) has not been reached.

320 Presence of some Fe oxides has been detected in samples from the study area. Therefore more Cld could be  
321 produced by the reaction suggested by Bucher and Frey (1994):

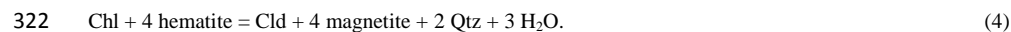

323 However, it has been observed in thin sections that occurrence of Prl is almost restricted to veins and  
324 fracture zones, suggesting that Cld could have been formed during the hydrothermal alteration of the pelites  
325 following the reaction proposed by Phillips (1988):

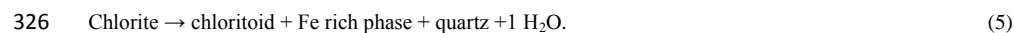

327 Presence of Cld in the anchizone has been discussed by Kisch (1983), who concluded that Cld cannot  
328 unequivocally be regarded as an indicator of the beginning of the epizone, as previously suggested, because there  
329 are occurrences in the anchizone (Árkai et al., 1981). In the study area, Cld is more abundant in the epizonal  
330 samples of the Valsurbio (6) and W Yuso-Carrion (3W) areas, but it is also present in low anchizone and a few  
331 deep diagenetic samples from the Riaño Cervera (5E), Pisuerga (4E) or Valdeón (2) areas, thus corroborating the  
332 conclusion of Kisch (1983).

333 Chloritoid and Prl are widespread in virtually all rock types and grade conditions (Appendix 2 in the  
334 supplementary material). This occurrence could be related to basin wide alteration by infiltrating hydrothermal  
335 fluids (Phillips, 1988; Brime and Valín, 2006). Late to post Variscan fluid flow events have been described in the  
336 other areas of the Cantabrian Zone (Ayllón et al., 2003; Gasparri et al., 2003) and related to a more general  
337 Variscan event (Boni et al., 2000).

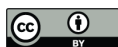

#### 338 4.2 Conodont colour alteration index (CAI).

339 The CAI values are independent of the stratigraphic position of the samples (Fig. 8). These values vary widely,  
340 ranging from 1.5 to 7.5, corresponding respectively to intervals of temperatures of < 40-60°C and 550-590°C  
341 (see Appendix 1 in the supplementary material). However, values equal to or lower than 2 are unusual, being  
342 limited to the southeastern sector of the Pisuerga-Carrión unit. Some samples with conodonts having high CAI  
343 values and a range of one and a half units, or more, are indicative of contact metamorphism and/or hydrothermal  
344 processes. Values  $\geq 6$  are usually found close to outcrops of igneous rocks. The upper boundary of the ancaizone  
345 (CAI = 4) corresponds to a temperature range of 190 - 225°C, while the lower limit (CAI = 5.5) corresponds to  
346 the range of 340-375°C.

347 The lack of carbonate rocks prevents in some areas the construction of a complete map of CAI isograds;  
348 however, it is possible to observe that they crosscut the trend of the Variscan structures. CAI data allow the  
349 distinguishing of the following sectors in the study area (Fig. 8):

- 350 (a) Northern sector (Liebana and Valdeón areas). This is an ancaizonal area that passes without thermal  
351 discontinuity through the basal thrust of the Picos de Europa unit. Inside this unit, the boundary  
352 ancaizone/diacaizone appears and the CAI decreases northwards (Bastida et al., 2004; Blanco-Ferrera et al.,  
353 2011).
- 354 (b) Central-eastern sector (eastern part of the Yuso-Carrión area) with dominance of ancaizonal conditions. Here,  
355 in the areas where CAI data exist, a remarkable homogeneity of CAI values appears, mainly in the Devonian  
356 rocks of the area located to the east of the Curavacas-Lechada syncline.
- 357 (c) Central and western sectors, (western part of the Yuso-Carrión and Riaño-Cervera areas) where the limited  
358 CAI data available indicate that epicaizonal areas coexist with ancaizonal areas.
- 359 (d) Southern sector. It corresponds to the VU and presents a wide area with epicaizonal conditions (García-  
360 López et al., 2013).
- 361 (e) Southeastern sector (eastern part of the Yuso-Carrión and Pisuerga areas). In this area, diacaizonal  
362 conditions are dominant, but ancaizonal and epicaizonal areas also appear. The latter areas appear adjacent  
363 to outcrops of igneous rocks. The greater variation of CAI values is found in this area, with a range from 1.5  
364 to 7.

365 The apparently chaotic distribution of CAI isograds is probably due to a heat from subsurface intrusions at  
366 depth resulting in isotherms having complex geometry. This pattern may be related to a crustal thinning during  
367 an extensional episode and to the subsequent intrusion of igneous bodies that emplaced at different levels,  
368 generating contact metamorphism and hydrothermal fluids.

369 In general, conodonts of the study area are undeformed and well preserved. Most of them have granular  
370 texture due to apatite recrystallization under high temperature. The apatite crystals do not show preferential  
371 orientation and their size increases with the temperature. The granular texture is commonly incipient for CAI  
372 values between 4 and 4.5 and is widespread for CAI values  $\geq 5$ . Furthermore some conodonts with CAI values  
373 between 6 and 7 have coarse recrystallization, corrosion and loss of ornamentation, so that in a few cases they  
374 have lost their original morphology (“ghost conodonts”). These alterations of conodonts with CAI values  $\geq 5$  are  
375 indicative of contact metamorphism and hydrothermal processes. Some conodonts with CAI  $\geq 4.5$  present sets of  
376 parallel microfissures, probably related to the rock cleavage. Conodonts with CAI  $\leq 4$  have occasionally  
377 unaltered surfaces, but most of them present a sugary texture (dull, frosted or pitted surfaces). The surfaces of

378 these conodonts show several types of overgrowth of apatite crystals, mainly developed independently of the  
379 CAI value (or thermal changes under diacaizonal conditions); they were usually a result of apatite solution and  
380 crystallization processes (Blanco-Ferrera et al., 2011).

#### 381 4.3 Cleavage development and tectonothermal events

382 Two main cleavages have been found in the study area (Fig. 9). Cleavage  $S_1$  is a rough foliation associated with  
383 upright folds and trends approximately E-W; it appears mainly in the northern half of the study area. This  
384 cleavage affects latest Carboniferous rocks (Kasimovian-Gzhelian age). Cleavage  $S_2$  dips gently, crosscuts  
385 earlier upright folds and is associated with the development of meter-scale open cascade folds. It is especially  
386 well developed in the Curavacas-Lechada syncline and in the VU. Both cleavages appear in different areas and  
387 have not been observed superimposed. The existence of two cleavages with different age suggests that two  
388 tectonothermal events took place in the southeastern sector of the CZ.

389 The first event, associated with the  $S_1$  cleavage (sub-vertical), is not well defined, since it developed in an  
390 area where presence of I/S and Kln and KI and AI values indicate deep diagenesis or low anchizonal conditions,  
391 and CAI values dominantly show ancaizonal conditions. According to the age of the latest rocks affected, this  
392 event probably occurred during the late Gzhelian. It resulted in crustal thickening produced by the N - S  
393 shortening that gave rise to the emplacement of the Picos de Europa unit, the last major Variscan thrust unit that  
394 was generated in the foreland fold and thrust belt, and it disassociated with the development of other thrusts and  
395 folds to the south of this unit.

396 The second event produced cleavage  $S_2$  that crosscuts the upright folds in the southern part of the study  
397 area (Curavacas-Lechada syncline and the VU). Under the microscope, this cleavage shows evidences of  
398 pressure solution and crystallization of oriented muscovite and chlorite with formation of chlorite-muscovite  
399 porphyroblasts. X-ray diffraction indicates that the rocks affected by this cleavage present Chl + Pg-Pg/Ms  
400 assemblages; KI and AI values indicate high anchizonal to epizonal conditions and CAI values indicate similar  
401 conditions. The gently dipping attitude of  $S_2$  suggests that this event was associated with an extensional  
402 deformation and the corresponding crustal thinning as a consequence of a late orogenic gravitational  
403 readjustment of the orogen in the core of the Ibero-Armorican arc. This interpretation agrees with the kinematic  
404 evolution of the arc proposed by Gutiérrez-Alonso et al. (2004, 2011). The event culminated with the intrusion  
405 of igneous rocks that [traversed](#) the rocks with cleavage and generated a contact metamorphism associated with  
406 hydrothermal processes, as indicated by: (1) the widespread presence of Cld and Prl (Fig 5; Brime and Valín,  
407 2006) and low KI and AI values, (2) recrystallization in conodonts (granular texture), (3) high CAI values in  
408 samples close to outcrops of intrusive rocks, (4) wide range of CAI in some samples, and (5) irregular variation  
409 of the CAI through the area and strong corrosion in some conodonts. The cleavage  $S_2$  developed earlier than the  
410 porphyroblasts (biotite, andalusite and chloritoid) formed during the contact metamorphism associated with the  
411 granodioritic stock of Peña Prieta (Gallastegui et al., 1990; Rodríguez Fernández, 1994), whose age is Ciszuralian  
412 (292+2/-3 Ma after Valverde-Vaquero et al., 1999). These data suggest the development of a thermal event that  
413 took place near the boundary Carboniferous-Permian and that progressed during the Ciszuralian with the intrusion  
414 of many small igneous bodies that rose along faults (Suárez and García, 1974; Corretgé and Suárez, 1990).

415 In some locations,  $S_2$  is gently folded with local development of crenulation cleavage. This may be a result  
416 of the Alpine deformation, which is the only post-Variscan compressional deformation described in the area

417 (Gallastegui, 2000 and references therein), and involves a ductile deformation that required a moderate  
418 temperature and gave rise to a dome shape in the Valsurbio unit (Marín, 1997).

419 The features described above refer to late-Variscan events related to the development of penetrative  
420 structures or to the intrusion of igneous rocks. However, the existence of such events does not preclude the  
421 development of others subsequently, such as the hydrothermal post-Variscan episodes described by Boni et al.  
422 (2000), Muchez et al. (2005), Gasparrini et al. (2006) and Clauer and Weh (2014).

## 423 5 Discussion

424 The distribution of the different grade indicators used in the study area shows, in general, an acceptable  
425 correlation between them, although some discrepancies have been observed. All methods coincide in pointing  
426 out the location of the areas with higher metamorphic grade, being the CAI and the AI the indicators that tend to  
427 give the highest and the lowest grade respectively. All indices point to an irregular distribution of the areas with  
428 very low-grade metamorphism. Diacaizonal areas are limited to the southeastern sector. A discrepancy is  
429 observed in the eastern Yuso-Carrión area between clay mineral and CAI data. A notable number of CAI values  
430 systematically indicate ancaizonal conditions, whereas clay assemblages with abundant I/S and Kln, KI and AI  
431 indicate diagenetic conditions.

432 The correlation among the different indicators that can be used to establish the metamorphic grade is  
433 challenging due to several factors, such as the different kinetics of the processes that modify the colour of the  
434 conodonts and the transformation of the clay minerals and the different influence of fluids in limestones and  
435 pelitic rocks. These processes could explain the discrepancies observed.

436 In the context of the Cantabrian Zone, the low-grade extensional metamorphism of the PCU extends  
437 westwards and allows an elongated area to be defined that can be followed up to the Central Coal Basin (Fig. 1)  
438 (Aller, 1981, 1986; Brime, 1985; Aller et al., 1987, 2005; García-López et al., 2007). The biggest width of this  
439 zone is in the study area, coinciding with the core of the Ibero-Armorican arc. In the Central Coal Basin, this  
440 metamorphism is linked to the occurrence of cleavage associated with crosscutting folds and it has been related  
441 to the possible existence of igneous bodies in depth (Aller, 1986) or to the rise of fluids along faults, especially  
442 the León fault (Aller et al., 2005). In the metamorphic southern part of the study area (VU), the metamorphism  
443 disappears westward, so that the adjacent western unit of the Esla nappe region is not metamorphic (García-  
444 López et al., 2013; Valín and Brime unpublished data).

445 The existence of hydrothermal alteration has been suggested by Brime and Valín (2006) and Clauer and  
446 Weh (2014). The common occurrence of Cl<sub>2</sub> and Pr<sub>1</sub> and the irregular distribution of CAI values, the wide range  
447 in the high CAI values in some samples and textural alterations of conodonts agree with the occurrence of  
448 hydrothermal fluids and possible subsurface igneous bodies. As for the thermal events dated by Clauer and Weh  
449 (illite K-Ar; 2014), the first has an age(293 ±3 Ma), comparable to that of the Peña Prieta granitoid (292+2/-3 Ma  
450 after Valverde-Vaquero et al., 1999, Cisuralian), and the others (Guadalupian, middle Triassic and early-middle  
451 Jurassic) are probably related to the crustal extension associated with the Basque-Cantabrian basin. Specific  
452 structural evidences of these three later events have not been found and their temperatures were probably lower  
453 than those of the episode linked to the late-Variscan extensional episode, which, being related to igneous  
454 intrusions, probably gave rise to the paleothermal peak.

455 The zircon (U-Th)/He ages obtained by Fillon et al. (2012) indicate that the Westphalian (Bashkirian-  
456 Moscovian) rocks involved in the dating had probably a temperature above 180°C up to 37-39 Ma ago (Eocene).  
457 This is consistent with the occurrence of Alpine ductile deformation, which resulted in a local crenulation  
458 cleavage.

## 459 6 Conclusions

460 Study of the low-grade metamorphic rocks and associated structures in the south-eastern sector of the CZ has  
461 allowed a model for the tectonothermal evolution of the core of an arcuate orogenic belt to be developed. This  
462 core, although it is a part of a foreland fold and thrust belt where diagenetic conditions are dominant, portrays a  
463 complex evolution due to its special location inside the belt. It was thrust during the Carboniferous by large units  
464 from south, west and north, which resulted in a great accumulation of syntectonic sediments, and development of  
465 unconformities and structures. The latter arose as a result of compression in different directions that also  
466 generated a crustal thickening. The emplacement of the last thrust unit (Picos de Europa unit) produced a N – S  
467 shortening that generated thrusts and associated folds. Shortly afterwards, upright folds with E – W trend and  
468 associated cleavage ( $S_1$ ) developed, mainly in the northern part of the sector. The ductile deformation occurred  
469 under thermal conditions which reached the anchizone and the ancaizone in some areas. This represents the first  
470 tectonothermal event registered in the southeastern sector of the CZ.

471 At the end of the Variscan deformation, gravitational instability gave rise to an extensional episode and the  
472 corresponding crustal thinning. During this event an increase in the thermal gradient enabled ductile deformation  
473 and low-grade metamorphism to take place in some areas (second tectonothermal event), mainly in the central  
474 part (Curavacas-Lechada syncline) and the southern part (Valsurbio unit) of the sector. The ductile deformation  
475 produced gently dipping cleavage ( $S_2$ ) crosscutting earlier upright  $F_1$  folds. Some small open cascade folds were  
476 also produced. The metamorphism reached epizonal and epicaizonal conditions during this event. The process  
477 culminated in the Cisuralian with the intrusion of igneous rocks and the development of contact metamorphism  
478 around the larger igneous bodies. In the case of Peña Prieta granodiorite, post  $S_1$  andalusite porphyroblasts  
479 developed. Hydrothermal fluids were common during this extensional episode, resulting in the development of  
480  $Prl$  and  $Cld$ , and textural alteration and high CAI dispersions in conodont samples.

481 As a whole, the metamorphic grade is independent of the stratigraphic location of the samples and the trend  
482 of the main structures, indicating the late-orogenic character of the tectonothermal events. The thermal level  
483 decreases progressively northwards inside the adjacent Picos de Europa unit. On the other hand, the  
484 metamorphism associated with the extensional episode in the PCU is extended westwards as an elongated area  
485 whose development was probably favoured by the rise of fluids along faults, especially along the León fault.

486 With the development of the adjacent Basque-Cantabrian basin, the extensional regime extended during the  
487 Mesozoic, with the probable occurrence of hydrothermal processes. The temperature of the rocks was probably  
488 important during Cenozoic times (> 180°C until the late-Eocene after Fillon et al., 2012, in the eastern part of the  
489 study area), so that the Alpine deformation generated locally some ductile deformation with crenulation cleavage  
490 affecting the  $S_2$  cleavage.

491 The evolution described above is summarized in Table 1.

492

493 **Acknowledgements.** This paper is dedicated to the memory of Andrés Pérez Estaún in recognition to his major  
494 contribution to the study the geology of the Variscan belt in Spain and his pioneer work on the low-grade  
495 metamorphism of the area, and in gratitude for fruitful cooperation over a period of many years. The present  
496 paper has been supported by the CGL2015-66997-R project funded by the ~~Spanish Ministry of Economy and~~  
497 ~~Competitiveness~~. The authors acknowledge Dr. Robin Offler who read an earlier version of this paper and  
498 suggested improvements. Susana García-López acknowledges the cooperation of C. F. Winkler Prins from the  
499 National Museum of Natural History (Leiden, Netherlands) and H. Jahnke from the Institut und Museum für  
500 Geologie und Paläontologie (Göttingen, Germany) ~~in facilitating~~  
501 of these institutions.

## 502 References

- 503 Aller, J.: La estructura del borde sudoeste de la Cuenca Carbonífera Central (Zona Cantábrica, NW de España),  
504 Trabajos de Geología, 11, 3-14, 1981.
- 505 Aller, J.: La estructura del sector meridional de las unidades del Aramo y Cuenca Carbonífera Central,  
506 Principado de Asturias, Spain, 180 pp, 1986.
- 507 Aller, J., Bastida, B., Brime, C., and Pérez-Estaún, A.: Cleavage and its relation with metamorphic grade in the  
508 Cantabrian Zone (Hercynian of North-West Spain), Sci. Géol. Bull., 40, 255-272, 1987.
- 509 Aller, J., Valín, M.L., García-López, S., Brime, C., and Bastida, F.: Superposition of tectono-thermal episodes in  
510 the southern Cantabrian Zone (foreland thrust and fold belt of the Iberian Variscides, NW Spain), Bull. Soc.  
511 Géol. France, 176, 503-514, 2005.
- 512 Alonso, J.L. and Rodríguez Fernández, L.R.: Las discordancias carboníferas de la región del Pisuerga-Carrión  
513 (Cordillera Cantábrica, NO de España). Significado orogénico, Comptes Rendus del X Congreso  
514 Internacional de Estratigrafía y Geología del Carbonífero, Instituto Geológico y Minero de España, Madrid,  
515 Spain, 533-540, 1983.
- 516 Alonso, J. L., Marcos, A., and Suárez, A.: Paleogeographic inversion resulting from large out of sequence  
517 breaching thrusts: The León Fault (Cantabrian Zone, NW Iberia). A new picture of the external Variscan  
518 Thrust belt in the Ibero-Armorican Arc, Geologica Acta, 7, 451-473, doi: 10.1344/105.000001449, 2009.
- 519 Alonso, J. L., Marcos, A., and Suárez, A.: El Cabalgamiento de León: implicaciones en la división geológica de  
520 la Zona Cantábrica, Geotemas, 13, 337-340, 2012.
- 521 Ambrose, T., Carballeira, J, López Rico, J., and Wagner, R.H.: Mapa Geológico de España E. 1:50.000, Hoja N°  
522 107, Inst.Geol. Min. España, 1984.
- 523 Árkai, P.: Chlorite crystallinity: an empirical approach and correlation with illite crystallinity, coal rank and  
524 mineral facies as exemplified by Palaeozoic and Mesozoic rocks of northeast Hungary, J. Metamorph. Geol.,  
525 9, 723-734, 1991.
- 526 Árkai, P.: Phyllosilicates in very low-grade metamorphism: transformation to micas, in: Mottana A., Sassi, F. P.,  
527 Thompson J. B., Guggenheim, S. (eds), Micas: crystal chemistry and metamorphic petrology, Mineralogical  
528 Society of America, Blacksburg, Virginia, Rev. Mineral. Geochem. 46, 463-478. 2002.

- 529 Árkai, P., Horváth, Z. A., and Tóth, M.: Transitional very low-and low-grade regional metamorphism of the  
 530 Paleozoic formations, Uppony Mountains, NE-Hungary: mineral assemblages, illite-crystallinity, -b0 vitrinite  
 531 reflectance data, *Acta Geol. Acad. Sci. Hung.*, 24, 265-294, 1981.
- 532 Árkai, P., Sassi, F.P., and Sassi, R.: Simultaneous measurements of chlorite and illite crystallinity: a more  
 533 reliable tool for monitoring low- to very low grade metamorphism in metapelites. A case study from the  
 534 Southern Alps (NE Italy), *Eur. J. Mineral.*, 7, 1115-1128, 1995.
- 535 Árkai, P., Faryad, S. W., Vidal, O., and Balogh, K.: Very low-grade metamorphism of sedimentary rocks of the  
 536 Meliata unit, Western Carpathians, Slovakia: implications of phyllosilicate characteristics, *Int. J. Earth Sci.*,  
 537 92, 68-85, doi:10.1007/s00531-002-0303-x, 2003.
- 538 Árkai, P., Sassi, F.P., and Desmonds, J. 2007. 5. Very low- to low-grade metamorphic rocks. Recommendations  
 539 by the IUGS Subcommittee on the Systematics of Metamorphic rocks, Web version of 01/02/07, 2007.
- 540 Ayllón, F., Bakker, R.J., and Warr, L. N.: Re-equilibration of fluid inclusions in diagenetic-anchizonal rocks of  
 541 the Ponga-Cuera-Matallana coal basin (NW Spain), *Geofluids*, 3, 49-68, doi: 10.1046/J.I468-8123.2003.00048.X,  
 542 2003.
- 543 Bastida, F., Brime, C., García-López, S., and Sarmiento, G.N.: Tectonothermal evolution in a region with thin  
 544 skinned tectonics: the western nappes in the Cantabrian Zone (Variscan belt of NW Spain), *Int. J. Earth. Sci.*  
 545 (*Geol. Rundsch.*), 88, 38-48, doi: 10.1007/s005310050244, 1999.
- 546 Bastida, F., Brime, C., García-López, S., Aller, J., Valín, M. L., and Sanz López, J.: Tectonothermal evolution of  
 547 the Cantabrian Zone (NW Spain), in: *Palaeozoic conodonts from northern Spain*, editors: García-López, S.,  
 548 and Bastida F., *Cuadernos del Museo Geominero 1*, Inst. Geol. y Minero, Madrid, Spain, 105-23, 2002.
- 549 Bastida, F., Blanco-Ferrera, S., García-López, S., Sanz-López, J., and Valín, M.L.: Transition from diagenesis to  
 550 metamorphism in a calcareous tectonic unit of the Iberian Variscan belt (Central massif of the Picos de  
 551 Europa, NW Spain), *Geol. Mag.*, 141, 617-628, doi: 10.1017/S0016756804009653, 2004.
- 552 Battaglia, S.: Variations in the chemical composition of illite from five geothermal fields: a possible  
 553 geothermometer, *Clay Miner.*, 39, 501-510, doi:10.1180/0009855043940150, 2004.
- 554 Blanco-Ferrera, S., Sanz-López, J., García-López, S., Bastida, F., and Valín, M.L.: Conodont alteration and  
 555 tectonothermal evolution of a diagenetic unit in the Iberian Variscan belt (Ponga-Cuera unit, NW Spain),  
 556 *Geol. Mag.*, 148, 35-49, doi:10.1017/S0016756810000269, 2011.
- 557 Boni, M., Iannace, A., Bechstädt, T., and Gasparrini, M.: Hydrothermal dolomites in SW Sardinia (Italy) and  
 558 Cantabria (NW Spain): evidence for late- to post-Variscan widespread fluid-flow events, *J. Geochem.*  
 559 *Explor.* 69-70, 225-228, 2000.
- 560 Brime, C.: A diagenesis to metamorphism transition in the Hercynian of north-west Spain, *Mineral. Mag.*, 49,  
 561 481-484, 1985.
- 562 Brime, C.: Metamorfismo de bajo grado: ¿diferencias en escala o diferencias en grado metamórfico?, *Trabajos*  
 563 *de Geología*, 21, 61-66, 1999.
- 564 Brime, C. and Valín, M.L.: Asociaciones con cloritoide en rocas de bajo grado metamórfico de la Unidad del  
 565 Pisuerga-Carrión (Zona Cantábrica, NO de España), *Macla*, 6, 105-108, 2006.
- 566 Brime, C., Talent, J.A., and Mawson, R.: Low-grade metamorphism in the Palaeozoic sequence of the  
 567 Townsville hinterland, northeastern Australia, *Aust. J. Earth Sci.*, 50, 751-767, doi:10.1111/j.1440-  
 568 0952.2003.01023.x, 2003.

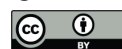

- 569 Brouwer, A.: Deux facies dans le Dévonien des montagnes cantabriques meridionales, *Breviora Geológica*  
570 *Astúrica*, VIII, 3-10, 1964.
- 571 Bucher, K. and Frey, M.: *Petrogenesis of Metamorphic Rocks*, 6<sup>th</sup> Edn. Springer-Verlag, Berlín, 318 pp, 1994.
- 572 Clauer, N. and Weh, A.: Time constraints for the tectono-thermal evolution of the Cantabrian Zone in NW Spain  
573 by illite K-Ar dating, *Tectonophysics*, 623, 39-51, <http://dx.doi.org/10.1016/j.tecto.2014.03.013>, 2014.
- 574 Colmenero, J. R. and Prado, J.-G.: Coal basins in the Cantabrian Mountains, Northwestern Spain, *Int. J. Coal*  
575 *Geol.*, 23, 215-229, 1993.
- 576 Colmenero, J.-R., Suárez-Ruiz, I., Fernández-Suárez, J., Barba, P., and Llorens, T.: Genesis and Rank  
577 distribution of Upper Carboniferous coal basins in the Cantabrian Mountains, Northern Spain, *Int. J. Coal*  
578 *Geol.*, 76, 187-204, doi:10.1016/j.coal.2008.08.004, 2008.
- 579 Colmenero, J.R., Vargas, I., García-Ramos, J.C., Manjón, M., Creapo, A., and Matas, J.: *Mapa Geológico de*  
580 *España E. 1:50.000, Hoja N° 132, Guardo, Inst.Geol. Min. España*, 1982.
- 581 Corretgé, L.-G., and Suárez, O.: Igneous rocks of the Cantabrian/Palentine Zone, in: Dallmeyer R. D., and  
582 Martínez García, E. (eds), *Pre-Mesozoic Geology of Iberia*, *Pre-Mesozoic Geology of Iberia* 72-79, Springer,  
583 Berlin, 1990.
- 584 Corretgé, L.-G., Cienfuegos, I., Cuesta, A., Galán, G., Montero, P., Rodríguez Pevida, L.-S., Suárez, O., and  
585 Villa, L.: Granitoides de la Región Palentina (Cordillera Cantábrica, España), *Actas e Comunicações , IX*  
586 *Reuniao sobre a Geologia do Oeste Peninsular (Porto, 1985), Memorias Univ. Do Porto*, 1, 469-478, 1987.
- 587 Eberl, D. D.: Three zones for illite formation during burial diagenesis and metamorphism, *Clays Clay Miner.*, 41,  
588 26-37, 1993.
- 589 Engelder, T. and Marshak, S.: Disjunctive cleavage formed at shallow depths in sedimentary rocks, *J. Struct.l*  
590 *Geol.*, 7, 327-343, 1985.
- 591 Epstein, A. G., Epstein, J. B. and Harris, L.-D.: Conodont color alteration-an index to organic metamorphism,  
592 Washington, D.C., *Geol. Surv. Prof. Pap.*, 995, 1-27, 1977.
- 593 Essene, E.-J., and Peacor, D.-R.: Clay mineral thermometry - a critical perspective, *Clays Clay Miner.*, 43, 540-  
594 553, 1995.
- 595 Ferreiro Mählmann, R., Petrova, T.V., Pironon, J., Stern, W.B., Ghanbaja, J., Dubessy, J., and Frey, M.:  
596 Transmission electron microscopy study of carbonaceous material in a metamorphic profile from diagenesis  
597 to amphibolite facies (Bündnerschiefer, eastern Switzerland), *Schweiz. Mineral. Petrogr. Mitt.* 82, 253-272,  
598 2002.
- 599 Fillon, C., Pedreira, D., Barbero, L., Gautheron, C., Van der Beek, P., Pulgar, J.A., and Cuesta, A.: Evidencias  
600 termocronológicas de la exhumación tectónica Oligocena-Miocena de la Cordillera Cantábrica: nuevos datos  
601 de huellas de fisión en apatitos y (U-Th)/He en circones, *GeoTemas*, 13, 1642-1645, 2012.
- 602 Frankenfeld, H.: El manto del Montó-Arauz; interpretación estructural de la Región del Pisuerga-Carrión (Zona  
603 Cantábrica España), *Trabajos de Geología*, 13, 37-47, 1983.
- 604 Frey, M.: Progressive low-grade metamorphism of a black shale formation, Central Swiss Alps, with special  
605 reference to pyrophyllite and margarite bearing assemblages, *J. Petrol.*, 19, 1, 95-135, 1978.
- 606 Frey, M.: Very low-grade metamorphism of clastic sedimentary rocks, in: Frey M. (ed), *Low temperature*  
607 *metamorphism*, Blackie, Glasgow, pp 9-58, 1987.



- 608 Frey, M., Teichmüller, M., Teichmüller, R., Müllis, J., Künzi, B., Breitschmid, A., Gruner, U., and Schwizer, B.:  
 609 Very low grade metamorphism in external parts of the Central Alps: illite crystallinity, coal rank and fluid  
 610 inclusion data. *Eclogae Geol. Helv.* 73:173-203, 1980
- 611 Gallastegui, J.: Estructura cortical de la cordillera y margen continental cantábricos: perfiles ESCI-N, *Trabajos*  
 612 *de Geología*, 22, 9-234, 2000.
- 613 Gallastegui, G., Heredia, N., Rodríguez Fernández, L.R., and Cuesta, A.: El “stock” de Peña Prieta en el  
 614 contexto del magmatismo de la Unidad del Pisuerga-Carrión (Zona Cantábrica, N de España), *Cuadernos do*  
 615 *Laboratorio Xeolóxico de Laxe*, 15, 203-215, 1990.
- 616 García-López, S., Brime, C., Bastida, F., and Sarmiento, G. N.: Simultaneous use of thermal indicators to  
 617 analyse the transition from diagenesis to metamorphism: an example from the Variscan Belt of northwest  
 618 Spain, *Geol. Mag.*, 134, 323–334, 1997.
- 619 García-López, S., Bastida, F., Brime, C., Aller, J., Valín, M. L., Sanz-López J., Méndez, C. A., and Menéndez-  
 620 Álvarez, J. R.: Los episodios metamórficos de la Zona Cantábrica y su contexto estructural, *Trabajos de*  
 621 *Geología*, 21, 177-187, 1999.
- 622 García-López, S., Bastida, F., Aller, J., and Sanz-López J.: Geothermal palaeogradients and metamorphic  
 623 zonation from the conodont colour alteration index (CAI), *Terra Nova*, 13, 2, 79-83, , 2001.
- 624 García-López, S., Blanco-Ferrera, S., and Sanz-López, J.: Aplicación de los conodontos al conocimiento de la  
 625 evolución tectonotérmica de las zonas externas de los orógenos, *Revista Española de Micropaleontología*, 38,  
 626 289-298, 2006.
- 627 García-López, S., Brime, C., Valín, M. L., Sanz-López J., Bastida, F., Aller, J., and Blanco Ferrera, S.:  
 628 Tectonothermal evolution of a foreland fold and thrust belt: the Cantabrian Zone (Iberian Variscan belt, NW  
 629 Spain), *Terra Nova*, 19, 469-475, doi: 10.1111/j.1365-3121.2007.00773.x, 2007.
- 630 García-López, S., Bastida, F., Aller, J., Sanz-López, J., Marín, J. A., and Blanco Ferrera, S.: Tectonothermal  
 631 evolution of a major thrust system: the Esla-VU (Cantabrian Zone, NW Spain), *Geol. Mag.*, 150, 1047-1061,  
 632 doi:10.1017/S0016756813000071, 2013.
- 633 Gasparrini, M., Bakker, R.J., Bechstädt, Th., and Boni, M.: Hot dolomites in a Variscan foreland belt:  
 634 hydrothermal flow in the Cantabrian Zone (NW Spain), *J. Geochem. Explor.* 78-79, 501-507, doi:  
 635 10.1016/S0375-6742(03)00115-8, 2003.
- 636 Gasparrini, M., Bechstädt, Th., and Boni, M.: Massive hydrothermal dolomites in the southwestern Cantabrian  
 637 Zone (Spain) and their relation to the Late Variscan evolution, *Mar. Pet. Geol.*, 23, 543-568,  
 638 doi:10.1016/j.marpetgeo.2006.05.003, 2006.
- 639 Gómez-Fernández, F., Mangas, J., Both, R. A., and Arribas, A.: Metallogenesis of the Zn-Pb deposits of the  
 640 southeastern region of the Picos de Europa (Cantabria, Spain), in: Fenoll Hach-Ali, P., Torres-Ruiz J., and  
 641 Gervilla F. (eds), *Current research in geology applied to ore deposits*, Univ. Granada, Granada, Spain, 113-  
 642 116, 1993.
- 643 Gómez-Fernández, F., Both, R. A., Mangas, J., and Arribas, A.: Metallogenesis of Zn-Pb carbonate-hosted  
 644 mineralization in the southeastern region of the Picos de Europa (Central Northern Spain) Province: geologic,  
 645 fluid inclusion, and stable isotopes studies. *Econ. Geol.*, doi:95, 19-40, 10.2113/gsecongeo.95.1.19, 2000.
- 646 Groshong, Jr R. H., Pfiffner, O. A., and Pringle, L. R.: Strain partitioning in the Helvetic thrust belt of eastern  
 647 Switzerland from the leading edge to the internal zone, *J. Struct. Geol.* 6, 5-18, 1984.



- 648 Guggenheim, S., Bain, D.-C., Bergaya, F., Brigatti, M.F., Drits, V.A., Eberl, D.D., Formoso, M.L.L., Galán, E.,  
 649 Merriman, R.-J., Peacor, D.R., Stanjek, H., and Watanabe, T.: Report of the Association Internationale pour  
 650 l'Etude des Argiles (AIPEA) Nomenclature Committee for 2001: order, disorder, and crystallinity in  
 651 phyllosilicates and the use of the "Crystallinity Index", *Clays Clay Miner.*, 50, 406-409, 2002.
- 652 Gutiérrez-Alonso, G., Fernández-Suárez, J., and Weil, A.: Orocline triggered lithospheric delamination, in:  
 653 Sussman, A.J., and Weil, A.B., (eds), *Orogenic Curvature: Integrating Paleomagnetic and Structural*  
 654 *Analyses: Geol. Soc. Am. Special Paper 383*, 121–130, 2004.
- 655 Gutiérrez-Alonso, G., Murphy, J.B., Fernández-Suárez, J., Weil, A., Piedad Franco, M., and Gonzalo, J.C.:  
 656 Lithospheric delamination in the core of Pangea: Sm-Nd insights from the Iberian mantle, *Geology*, 39, 155-  
 657 158, doi: 10.1130/G31468.1, 2011.
- 658 Hemley, J. J., Monteya, J.W., Marinenko, J.W., and Luce, R.W.: Equilibria in the system  $Al_2O_3 - SiO_2 - H_2O$  and  
 659 some general implications for alteration mineralization processes, *Econ. Geol.*, 75, 210-228, 1980.
- 660 Heredia, N., Alonso, J.L., and Rodríguez Fernández, L.R. Mapa Geológico de España E. 1:50.000, Hoja N° 105,  
 661 Riaño, Inst. Geol. Min. España, 1997.
- 662 Heredia, N., Navarro, D., Rodríguez Fernández, L.R., Pujalte, V., and García Mondéjar, J.: Mapa Geológico de  
 663 España E. 1:50.000, Hoja N° 82, Tudanca, Inst. Geol. Min. España, 1986.
- 664 Heredia, N., Rodríguez Fernández, L.R., Suárez, A., and Álvarez Marrón, J.: Mapa Geológico de España E.  
 665 1:50.000, Hoja N° 80, Burón, Inst. Geol. Min. España, 1991.
- 666 Heward, A. P. and Reading, H.-G.: Deposits Associated with a Hercynian to Late Hercynian Continental Strike-  
 667 Slip System, Cantabrian Mountains, Northern Spain, *Special Publications of the International Association of*  
 668 *Sedimentologists*, 4, 105-125, 1980.
- 669 Hosterman, J.-W., Wood, G.-H., and Beryin, M.-J.: Mineralogy of underclays in the Pennsylvania anthracite  
 670 region, U.S. Geological Survey Professional Paper 700-C, C89-C97, 1970.
- 671 Hunziker, J.-C., Frey, M., Clauer, N., Dallmeyer, R.D., Friedrichsen, H., Flehmig, W., Hochstrasser, K.,  
 672 Roggwiler, P., and Schwander, H.: The evolution of illite to muscovite: mineralogical and isotopic data from  
 673 Glarus Alps, Switzerland, *Contrib. Mineral. Petrol.*, 92, 157-180, 1986.
- 674 Julivert, M.: Décollement tectonics in the Hercynian Cordillera of NW Spain, *Am. J. Sci.*, 270, 1-29, 1971.
- 675 Julivert, M. : Hercynian orogeny and Carboniferous paleogeography in northwestern Spain: A model of  
 676 deformation-sedimentation relationships, *Z. dt. geol. Ges.*, 129, 565-592, 1978.
- 677 Julivert, M., Ramirez del Pozo, J., and Truyols, J.: Le reseau de failles et la couverture post-hercynienne dans les  
 678 Asturies, in: *Histoire structurale du Golfe de Gascogne*, Publications de l'Institut Français du Pétrole,  
 679 Editions Tech. 2, V.3.1- V.3.34, 1971.
- 680 Julivert, J. and Navarro, D.: Mapa Geológico de España E. 1:50.000, Hoja N° 55, Beleño, Inst. Geol. Min.  
 681 España, 1984.
- 682 Keller, M., and Krumm, S.: Variscan versus Caledonian and Precambrian metamorphic events in the Cantabrian  
 683 Mountains. *Z. dt. Geol. Ges.*, 144, 88-103, 1993.
- 684 Kisch, H.-J.: Mineralogy and petrology of burial diagenesis (burial metamorphism) and incipient metamorphism  
 685 in clastic rocks, in: Larsen G, Chilingar G.V., (eds), *Diagenesis in sediments and sedimentary rocks*, 2.  
 686 Elsevier, Amsterdam, pp 289-493 and 513-541, 1983.



- 687 Kisch, H.-J.: Correlation between indicators of very-low grade metamorphism, in: Frey, M. (ed), Low  
 688 temperature metamorphism, Blackwell Science, Claridge, pp. 227-300, 1987.
- 689 Kisch, H.-J.: Illite crystallinity: recommendations on sample preparation, X-ray diffraction settings and  
 690 interlaboratory settings, *J. Metamorph. Geol.*, 9, 665-670, 1991.
- 691 Kisch, H.-J., Árkai, P., and Brime, C.: On the calibration of the illite Kübler index (illite “crystallinity”),  
 692 *Schweiz. Mineral. Petrogr. Mitt.* 84, 232-331, 2004.
- 693 Köberle, T., Keller, M., and Krumm, S.: Metamorphism in the southeastern corner of the Cantabrian Mountains  
 694 as revealed by the Upper Devonian Murcia Quartzite, *Zbl. Geol. Paläont. Teil I*, 5-6, 447-460, 1998.
- 695 Koopmans, B.-N.: The sedimentary and structural history of the Valsurvio dome, Cantabrian Mountains, Spain,  
 696 *Leidse. Geol. Med.*, 26, 121-232, 1962.
- 697 Kübler, B.: La cristallinité d’illite et les zones tout à fait supérieures du metamorphism. Etages  
 698 tectoniques. Université Neuchâtel à la Baconnière, Neuchâtel, Switzerland, Colloques de Neuchâtel 1966,  
 699 105-122, 1967.
- 700 Kullmann, J. and Schöenberg, R.: Facies differentiation caused by wrench deformation along a deep-seated  
 701 fault system (León line, Cantabrian Mountains, North Spain), *Tectonophysics*, 48, T15-T22, 1978.
- 702 Kullmann, J. and Schöenberg, R.: Facies differentiation caused by wrench deformation along a deep-seated  
 703 fault system (León line, Cantabrian Mountains, North Spain)-Reply, *Tectonophysics*, 60, 308-309, 1979.
- 704 Livi, K.-J.-T., Veblen, D.R., Ferry, J. M., and Frey, M.: Evolution of 2:1 layered silicates in low-grade  
 705 metamorphosed Liassic shales of Central Switzerland, *J. Metamorph. Geol.*, 15, 323-344, 1997.
- 706 Llorens, T., Suárez-Ruiz, I., and Colmenero J.R.: Petrografía de los carbones cantabrienses (Carbonífero sup.)  
 707 del Grupo Cea de la Cuenca Guardo-Valderrueda (León-Palencia), *Geogaceta*, 40, 279-282, 2006.
- 708 Lobato, L.: Geología de los valles altos de los ríos Esla, Yuso, Carrión y Deva. Institución Fray Bernardino de  
 709 Sahagún, León (C.S.I.C.), 192 pp., 1977.
- 710 Lobato, L., Rodríguez Fernández, L.R., Heredia, N., Velando, F., and Matas, J: Mapa Geológico de España E.  
 711 1:50.000, Hoja N° 106, Camporredondo de Alba, Inst. Geol. Min. España, 1985.
- 712 López-Fernández, C., Pulgar, J.-A., Gallart, J., González-Cortina, J.-M., Díaz, J., and Ruiz, M.: Actividad  
 713 sísmica reciente en el noroeste de la Península, 3ª Asamblea Hispano Portuguesa de Geodesia y Geofísica, 1-  
 714 4, Valencia, 2002.
- 715 López-Fernández, C., Pulgar, J.-A., Glez.-Cortina, J.-M., Gallart, J., Díaz, J., and Ruiz, M.: Actividad sísmica en  
 716 el noroeste de la Península Ibérica observada por la red sísmica local del Proyecto GASPI (1999-2002),  
 717 *Trabajos de Geología*, 24, 91-106, 2004.
- 718 Maas, K.: The geology of Liébana, Cantabrian Mountains, Spain: Deposition and Deformation in a flysch area,  
 719 *Leidse. Geol. Med.*, 49, 379-465, 1974.
- 720 Marcos, A.: Nota sobre el significado de la "León Line", *Breviora Geológica Astúrica*, 12, 1-15, 1968.
- 721 Marcos, A.: Facies differentiation caused by wrench deformation along a deep-seated fault system (León line,  
 722 Cantabrian Mountains, North Spain)-Discussion, *Tectonophysics*, 60, 303-307, 1979.
- 723 Marcos, A. and Pulgar, J.-A.: An approach to the tectonostratigraphic evolution of the Cantabrian Foreland thrust  
 724 and fold belt, Hercynian Cordillera of NW Spain, *Neues Jahrb. Geol. Paläontol. Abh.*, 163, 256-260, 1982.
- 725 Marín, J.A.: Estructura del domo de Valsurvio y borde suroriental de la región del Pisuerga-Carrión (Zona  
 726 Cantábrica, NO de España). Unpublished Ph. D. thesis, Oviedo University, 181 pp., 1997.



- 727 Marín, J.A., Pulgar, J.A., and Alonso, J.L.: La deformación alpina en el Domo de Valsurvio (Zona Cantábrica,  
 728 NO de España). *Revista de la Sociedad Geológica de España*, 8, 111-116, 1995.
- 729 Marín, J.-A., Villa, E., García-López, S., and Menéndez, J.-R.: Estratigrafía y metamorfismo del Carbonífero de  
 730 la zona de San Martín-Ventanilla (Norte de Palencia, Cordillera Cantábrica), *Revista de la Sociedad*  
 731 *Geológica de España*, 9, 241-251, 1996.
- 732 Marquínez, J. and Marcos, A.: La estructura de la unidad del Gildar-Montó (Cordillera Cantábrica), *Trabajos de*  
 733 *Geología*, 14, 53-64, 1984.
- 734 Martínez García, E., Marquínez, J., Heredia, N., Navarro, D., and Rodríguez Fernández, L.R.: Mapa Geológico  
 735 de España E. 1:50.000, Hoja Nº 56, Carreña-Cabrales, Inst. Geol. Min. España, 1984.
- 736 Martín-Izard, A., Palero, F.J., Regillón, R., and Vindel, E.: El skarn de Carracedo (San Salvador de Cantamuda).  
 737 Un ejemplo de mineralización pirometasomática en el N. de la provincia de Palencia, *Studia Geologica*  
 738 *Salmanticensia*, XXIII, 171-192, 1986.
- 739 Martín-Merino, G., Fernández, L.P., Colmenero, J.R., and Bahamonde, J.R.: Mass-transport deposits in a  
 740 Variscan wedge-top foreland basin (Pisuegra area, Cantabrian Zone, NW Spain) , *Marine Geology*, 356, 71-  
 741 87, <http://dx.doi.org/10.1016/j.margeo.2014.01.012>, 2014.
- 742 Merino-Tomé, O.A., Bahamonde, J.R., Colmenero, J.R., Heredia, N., Villa, E., and Farias, P.: Emplacement of  
 743 the Cuera and Picos de Europa imbricate system at the core of the Iberian-Armorican arc (Cantabrian zone,  
 744 Nord Spain: New precisions concerning the timing of arc closure. *Geol. Soc. Am. Bull.*121, 729-751, doi:  
 745 10.1130/B26366.1, 2009.
- 746 Merriman R.-J. and Peacor D.-R.: Very low-grade metapelites: mineralogy, microfabrics and measuring reaction  
 747 progress. In: M. Frey and D. Robinson (eds), *Low-Grade Metamorphism*, Blackwell Science, Oxford, 10-60,  
 748 1999.
- 749 Merriman, R.-J. and Frey, M.: Patterns of very low-grade metamorphism in metapelitic rocks. In: Frey, M. and  
 750 Robinson, D. (eds), *Low grade metamorphism*, Blackwell Science, London, pp 61-107, 1999.
- 751 Meunier, A.: *Clays*, Springer-Verlag, Berlín, Heidelberg, New York, 2005.
- 752 Moore, D.M. and Reynolds, R.-C.-Jr.: *X-ray diffraction and the identification and analysis of clay minerals*,  
 753 2nd ed., Oxford University Press, New York, 1997
- 754 Muechez, P., Heijlen, W., Banks, D., Blundell, D., Boni, M., and Grandia, F.: Extensional tectonics and the  
 755 timing and formation of basin-hosted deposits in Europe, *Ore Geol. Rev.* 27, 241-264,  
 756 doi:10.1016/j.oregeorev.2005.07.013, 2005.
- 757 Müllis, J.: The system methane-water as a geologic thermometer and barometer from the external parts of the  
 758 Central Alps, *B. Minéral.*, 102, 526-536, 1979.
- 759 Müllis, J., Rahn, M.-K., De Capitani, C., Stern, W.-B., and Frey, M.: How useful is illite “crystallinity” as a  
 760 geothermometer?, *Terra Nova*, 7, 128-129 (Supplement No. 1, Terra Abstracts), 1995.
- 761 Müllis, J., Rahn, M.K., Schwer, P., De Capitani, C., Stern, W.-B., and Frey, M.: Correlation of fluid inclusion  
 762 temperatures with illite “crystallinity” data and clay minerals chemistry in sedimentary rocks from the  
 763 external parts of the Central Alps, *Schweiz. Mineral. Petrogr. Mitt.*, 82, 325-340, 2002.
- 764 Nijman, W. and Savage, J. F.: Persistent basement wrenching as controlling mechanism of Variscan thin-skinned  
 765 thrusting and sedimentation, Cantabrian Mountains, Spain, *Tectonophysics*, 169, 281-302, 1989.
- 766 Passchier, C.W. and Trouw, R.-A.-J.: *Microtectonics*, 2<sup>nd</sup> ed., Springer, Berlin, 366 pp, 2005.

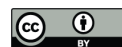

- 767 Patrick, B. E., Evans, B. W., Dumoulin, J. A., and Harris, A. G.: A comparison of carbonate mineral and  
 768 conodont color alteration index thermometry, Seward Peninsula, Alaska, Geological Society of America,  
 769 Abstracts with programs 17, 399, 1985.
- 770 Phillips, G. N.: Widespread fluid infiltration during metamorphism of the Witwatersrand goldfields: generation  
 771 of chloritoid and pyrophyllite, *J. metamorph. Geol.*, 6, 311-332, 1988.
- 772 Raven, J. G. M., and van der Pluijm, B. A.: Metamorphic fluids and transtension in the Cantabrian Mountains of  
 773 northern Spain: an application of the conodont color alteration index, *Geol. Mag.*, 123, 673-681, 1986.
- 774 Rejebian, V. A., Harris, A. G., and Huebner, J. S.: Conodont color and textural alteration: an index to regional  
 775 metamorphism, contact metamorphism, and hydrothermal alteration, *Geol. Soc. Am. Bull.*, 99, 471-479,  
 776 1987.
- 777 Rodríguez Fernández, L. R.: Evolución tectonosedimentaria del NO del Macizo Ibérico durante el Carbonífero,  
 778 Cuadernos do Laboratorio Xeolóxico de Laxe, 16, 37-52, 1991.
- 779 Rodríguez Fernández, L. R.: La estratigrafía del Paleozoico y la estructura de la región de Fuentes Carrionas y  
 780 áreas adyacentes (Cordillera herciniana, NO de España), Cuadernos do Laboratorio Xeolóxico de Laxe, Serie  
 781 Nova Terra, 9, A Coruña, 240 pp. 1994.
- 782 Rodríguez Fernández, L. R.: Tectónica Varisca y sedimentación sinorogénica carbonífera de la Región del  
 783 Pisuerga-Carrión. Guía de Campo. XIII Reunión Com. Tect. S.G.E. Inst. Geol. Min. España, Cervera de  
 784 Pisuerga (Spain), 85 pp, 2001.
- 785 Rodríguez Fernández, L. R., and Heredia, N.: La estratigrafía del Carbonífero y la estructura de la unidad del  
 786 Pisuerga-Carrión. NO de España, Cuadernos do Laboratorio Xeolóxico de Laxe, 12, 207-229, 1987.
- 787 Rodríguez Fernández, L.R. and Heredia, N.: Evolución tectonosedimentaria de una cuenca de antepaís ligada a  
 788 una cadena arqueada: el ejemplo de la unidad del Pisuerga-Carrión (Zona Cantábrica, NO de España), III  
 789 Congreso Geológico de España, Granada, Instituto Geológico y Minero de España, Simposio sobre  
 790 cinturones orogénicos, 65-74, 1988.
- 791 Rodríguez Fernández, L.R., Heredia, N., Navarro, D., Martínez-García, E., and Marquín, J.: Mapa Geológico  
 792 de España E. 1:50.000, Hoja Nº 81, Potes. Inst. Geol. Min. España, 1994.
- 793 Savage, J. F.: Tectonic analysis of Lechada and Curavacas synclines, Yuso basin, León, NW Spain, *Leidse*.  
 794 *Geol. Med.*, 39, 193-247, 1967.
- 795 Sitter, L.U. de: The structure of the Southern slope of the Cantabrian Mountains, *Leidse. Geol. Med.*, 26, 255-  
 796 264, 1962.
- 797 Środoń, J.: X-ray powder diffraction of illitic materials, *Clays Clay Miner.*, 32, 337-349, 1984.
- 798 Suárez, O. and Corretgé, L.G.: Plutonismo y metamorfismo en las zonas Cantábrica y Asturoccidental-leonesa,  
 799 in: Bea, F., Carnicero, A., Gonzalo, J.-C., López Plaza, M., and Rodríguez Alonso, A. D. (eds) *Geología de*  
 800 *los granitoides y rocas asociadas del Macizo Hespérico (libro homenaje a L.C. García de Figuerola)*, Ed.  
 801 Rueda, Madrid, 13-25, 1987.
- 802 Suárez, O. and García, A.: Petrología de la granodiorita de Peña Prieta (León, Santander, Palencia), *Acta Geol.*  
 803 *Hispanica*, 9, 154-158, 1974.
- 804 Thompson, A.P.: A note on the kaolinite-pyrophyllite equilibrium. *Am. J. Sci.*, 268, 454-458, 1970.
- 805 Theye, T., Seidel, E., and Vidal, O.: Carpholite, sudoite, and chloritoid in low-grade high-pressure metapelites  
 806 from Crete and The Peloponnese, Greece, *Eur. J. Mineral.*, 4, 3, 487-507, 1992.

- 807 Valverde-Vaquero, P., Cuesta, A., Gallastegui, G., Suárez, O., Corretgé, L. G., and Dunning, ~~G. R.~~: U-Pb dating  
808 of late Variscan magmatism in the Cantabrian Zone (Northern Spain), Meeting of the European Union of  
809 Geosciences 10 (EUG 10), Strasbourg, Journal of Conference, Abstracts, 4, 101, 1999.
- 810 Van der Pluijm., B.A., and Kaars-Sijpestijn, C.H.: Chlorite-mica aggregates: morphology, orientation,  
811 development and bearing on cleavage formation in very-low-grade rocks, *J. Struct. Geol.*, 6, 399-407, 1984.
- 812 Van der Pluijm., B.A., Savage, J.F., and Kaars-Sijpestijn, C.H.: Variation in fold geometry in the Yuso Basin,  
813 northern Spain: implications for de deformation regime, *J. Struct. Geol.*, 8, 879-886, 1986.
- 814 Van Veen, J.: The tectonic and stratigraphic history of the Cardaño area, Cantabrian Mountains, Northwest  
815 Spain, *Leidse. Geol. Med.*, 35, 45-104, 1965.
- 816 Velde, B.: Introduction to clay minerals, Chapman and Hall, 198 pp., 1992
- 817 Von Gosen, W., Buggisch, W., and Krumms, S.: Metamorphism and deformation mechanisms in the Sierras  
818 Australes fold and thrust belt (Buenos Aires Province, Argentina). *Tectonophysics*, 185, 335-356  
819 doi:10.1016/0040-1951(91)90453-Y, 1991.
- 820 Warr, L.N. and Rice, H.N.: Interlaboratory standardization and calibration of clay mineral crystallinity and  
821 crystallite size data, *J. Metamorph. Geol.* 12, 141-152, 1994.
- 822 Winkler, ~~H. G. F.~~; Petrogenesis of metamorphic rocks, 5th edition, Srpinger Verlag New York, 348 pp., 1979.
- 823 Zen, E-an: Metamorphism of Lower Paleozoic rocks in the vicinity of the Taconic Range in west-central  
824 Vermont, *Am. Mineral.*, 45, 1-2, 129-175, 1960.
- 825

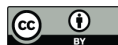

|                                                             |                                                                                                                                                                                                                                                                                                                                                                                                                  |
|-------------------------------------------------------------|------------------------------------------------------------------------------------------------------------------------------------------------------------------------------------------------------------------------------------------------------------------------------------------------------------------------------------------------------------------------------------------------------------------|
| Variscan deformation                                        | Emplacement of north-directed Palentine nappes (prior or earliest Moscovian) and the adjacent western Cantabrian nappes (late Moscovian) with associated thrusts in the PCU                                                                                                                                                                                                                                      |
| Variscan deformation (cont.)<br>(N-S shortening)            | Emplacement of the south-directed Picos de Europa unit; thrusts and folds in the PCU (Kasimovian-Gzhelian)<br>Folds and axial plane cleavage ( $S_1$ ); first tectonothermal event, with deep diagenetic – low anchizonal and ancaizonal areas in the northern part of the PCU (late Gzhelian)                                                                                                                   |
| Late Variscan gravitational readjustment; extensional event | Gently dipping cleavage ( $S_2$ ) associated with crosscutting folds; second tectonothermal event; very low- or low-grade metamorphism (high anchizone-epizone, and ancaizone-epicaizone) in the syncline of Curavacas-Lechada and the VU. Normal faults (latemost Gzhelian to early Cisuralian)<br>Intrusion of igneous rocks, contact metamorphism and wide development of hydrothermal processes (Cisuralian) |
| Extension linked to the Basque-Cantabrian basin             | Permian and Mesozoic hydrothermal episodes                                                                                                                                                                                                                                                                                                                                                                       |
| Alpine deformation                                          | N-S shortening, tightening of gentle folds, local crenulation cleavage and tilting of rocks northwards (Cenozoic).                                                                                                                                                                                                                                                                                               |

826 **Table 1. Tectonothermal evolution of the southeastern sector of the Cantabrian Zone.**

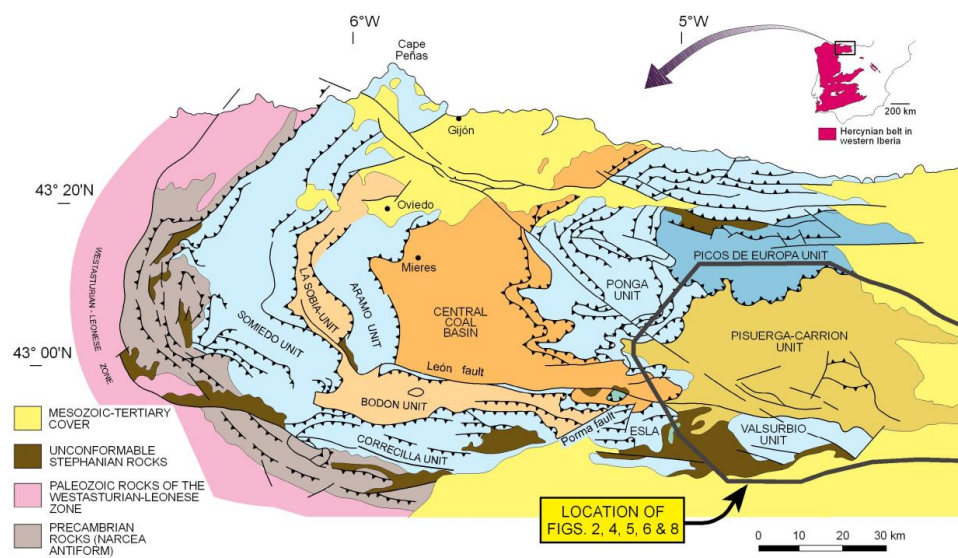

827

828 **Figure 1. Generalized geological map of the Cantabrian Zone (after Julivert 1971) showing major thrust**  
829 **units and the location of the study area.**



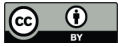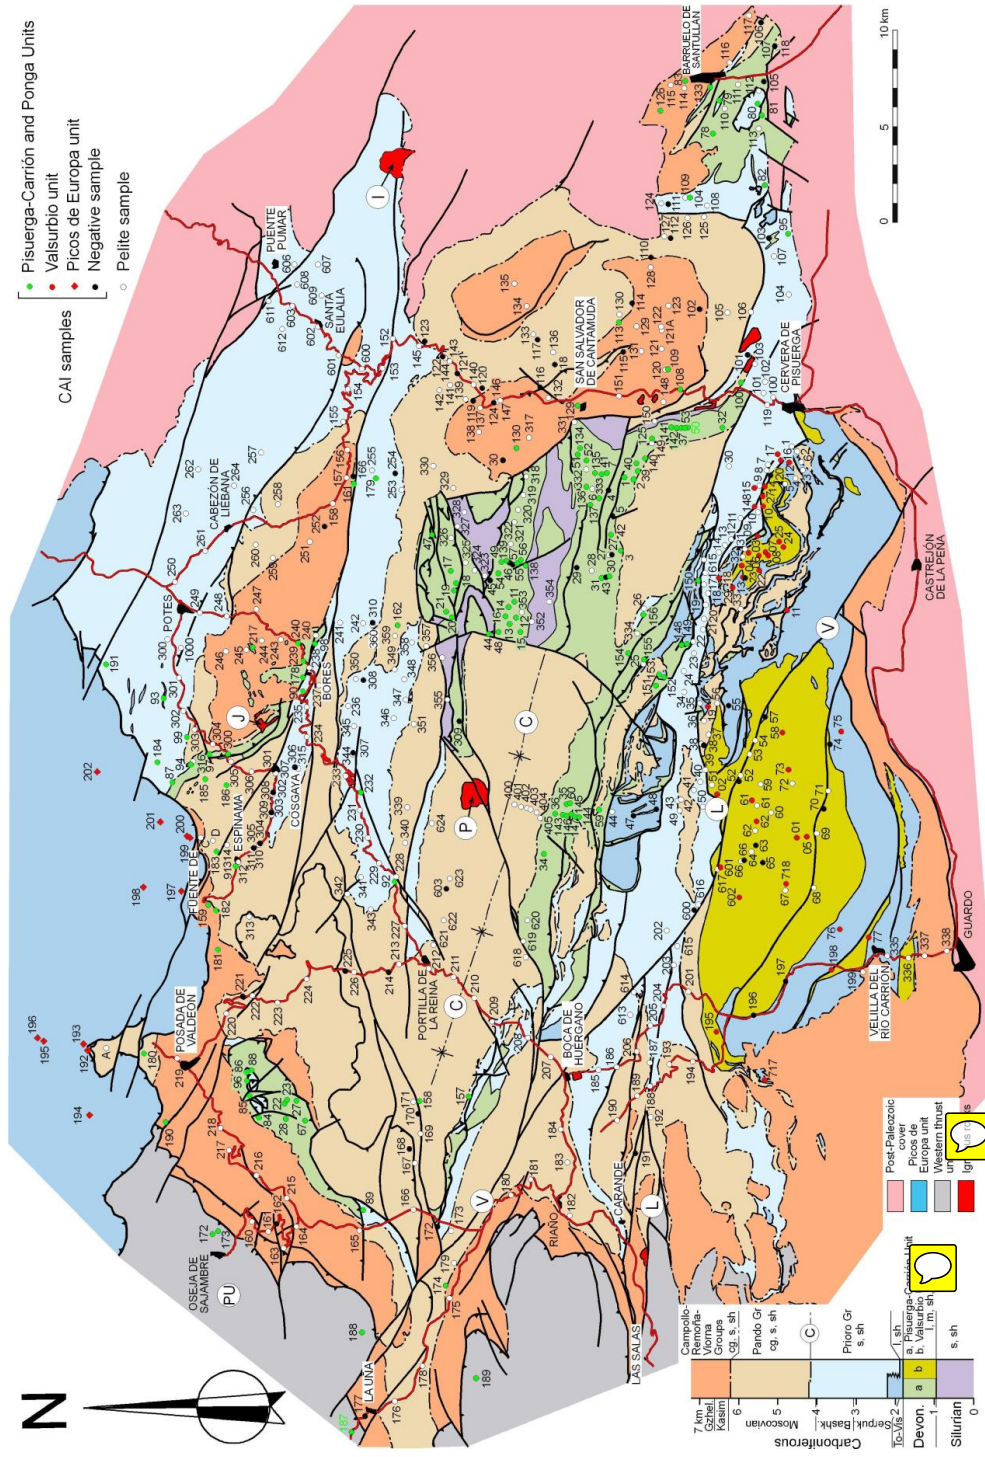

831 **Figure 2.** Geological map of the southeastern part of the Cantabrian Zone showing sampled localities  
 832 (composed from Lobato, 1977; Colmenero et al., 1982; Ambrose et al., 1984; Julivert and Navarro, 1984;  
 833 Martínez García et al., 1984; Lobato et al., 1985; Heredia et al., 1986, 1991, 1997; Rodríguez Fernández,  
 834 Rodríguez Fernández et al., 1994). Devonian and Silurian rocks of the PCU form the Palentine  
 835 nappes. cg, conglomerate; l, limestone; m, marl; s, sandstone; sh, shale. C, Curavacas-Lechada syncline; I,  
 836 Pico Iján granodiorite; J, Pico Jano granodiorite; L, León fault; P, Peña Prieta granodiorite; PU, Ponga  
 837 unit; V, Ventaniella fault. Picos de Europa conodont samples after Bastida et al., 2004; Valsurbio  
 838 conodont samples after García-López et al., 2013.

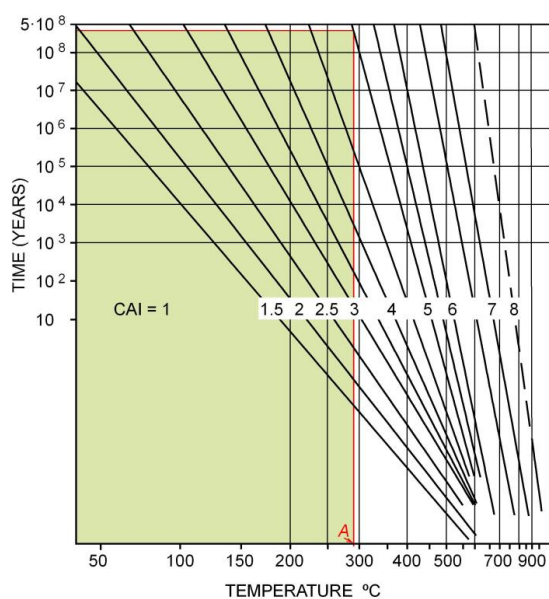

839  
 840 **Figure 3.** Arrhenius plot to determine paleotemperature from CAI values (on the lines) and heating time  
 841 (from Rejebian et al., 1987). Point A indicates the minimum temperature necessary to obtain a CAI = 5 for  
 842 a rock with an age of 400 Ma. The green area shows the temperatures and heating times unable to  
 843 produce CAI  $\geq$  5 in this rock.

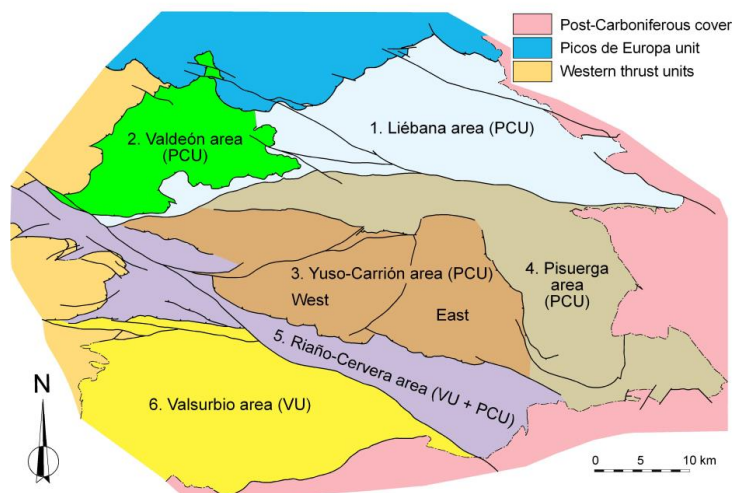

844

845 **Figure 4. Diagrammatic map indicating the areas in which the study units have been subdivided, following**

846 **Martín-Merino et al. (2014)**

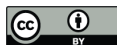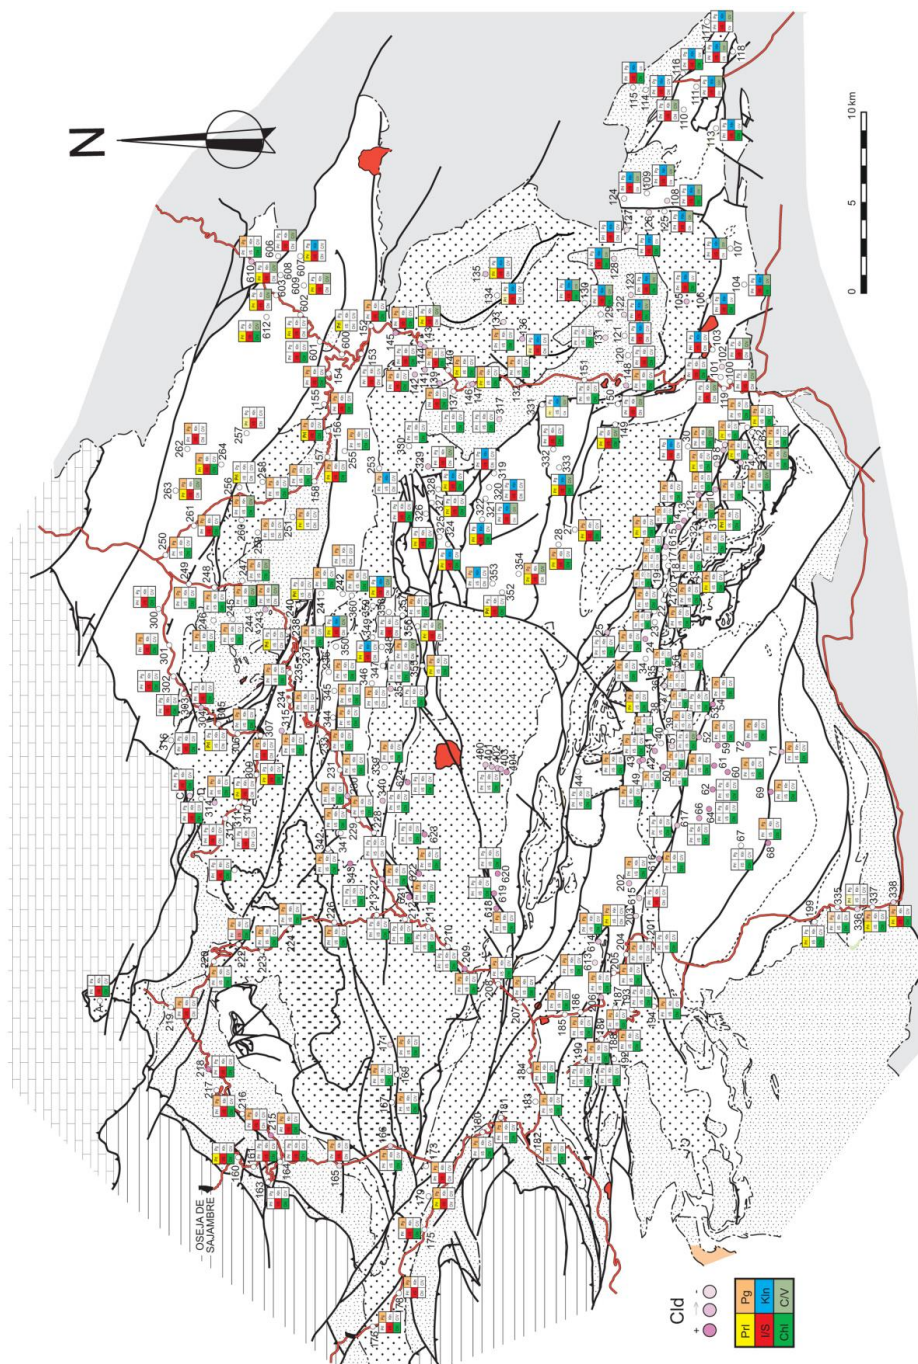

847

848 **Figure 5. Distribution of clay minerals in the study area. All the samples contain illite and therefore this**  
849 **phase has not been considered in the plot. Presence of a certain phase in the sample is indicated by the**  
850 **colour in the corresponding square. For legend see Figure 8**

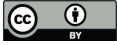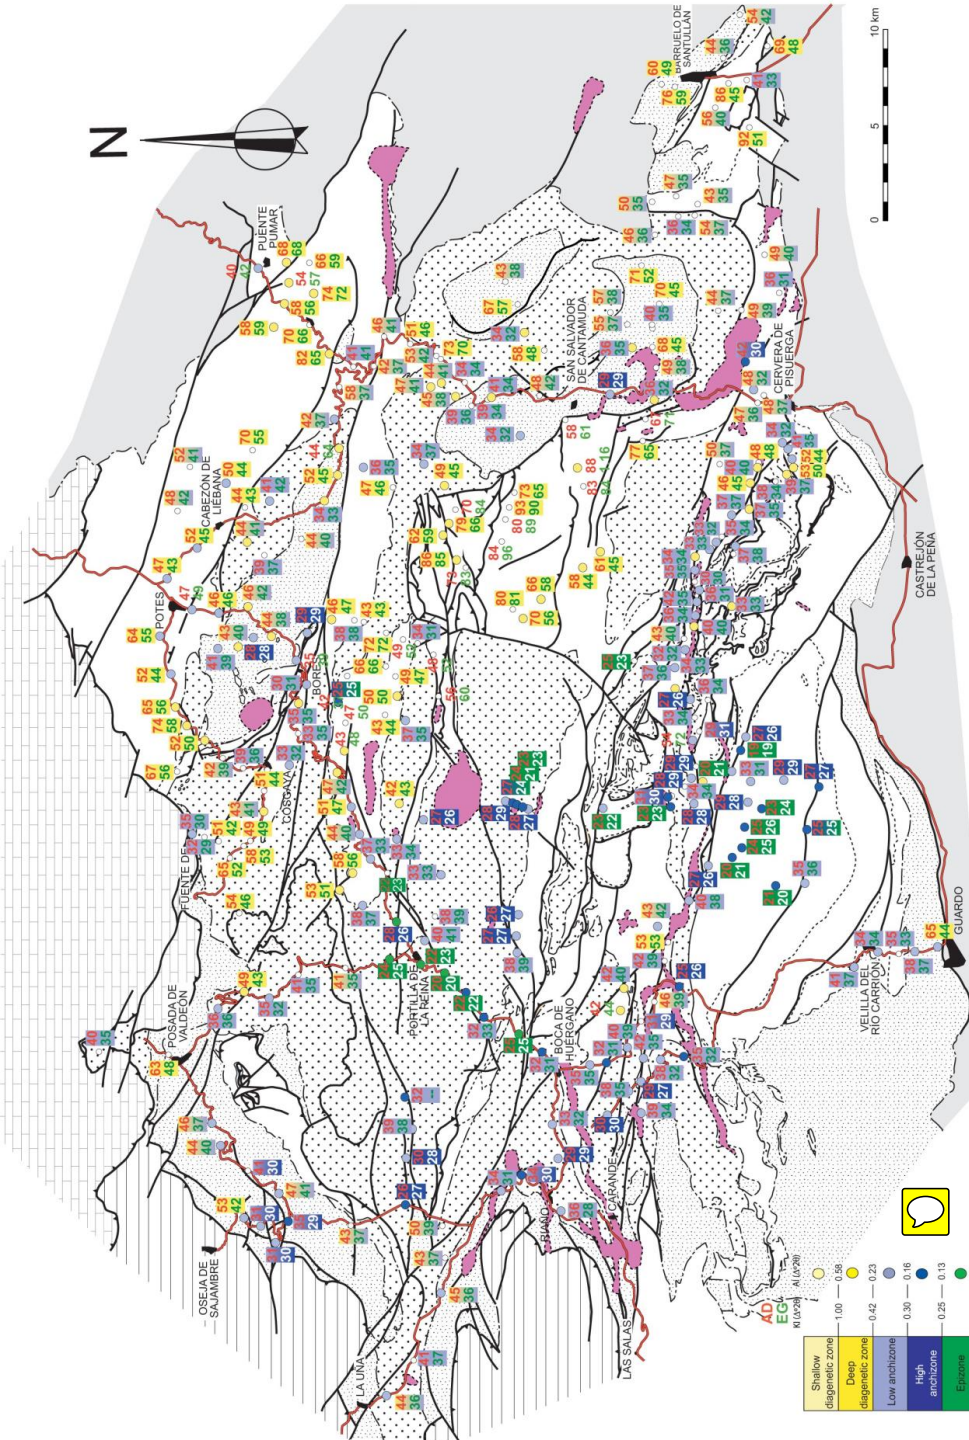

852 **Figure 6.** Map with location of Kübler Index (KI) values (Kübler scale). Upper value, in red, air dried  
 853 sample; lower value, in green, sample treated with ethylene glycol. Árkai Index (AI) is indicated by the  
 854 colour of the sampling point. Values corresponding to samples with significant amounts of I/S, Pr1 and/or  
 855 Pg-Pg/Ms have not been highlighted with grade colours. Areas with small outcrops of intrusive rocks are  
 856 shaded with purple colour. For legend see Figure 8.

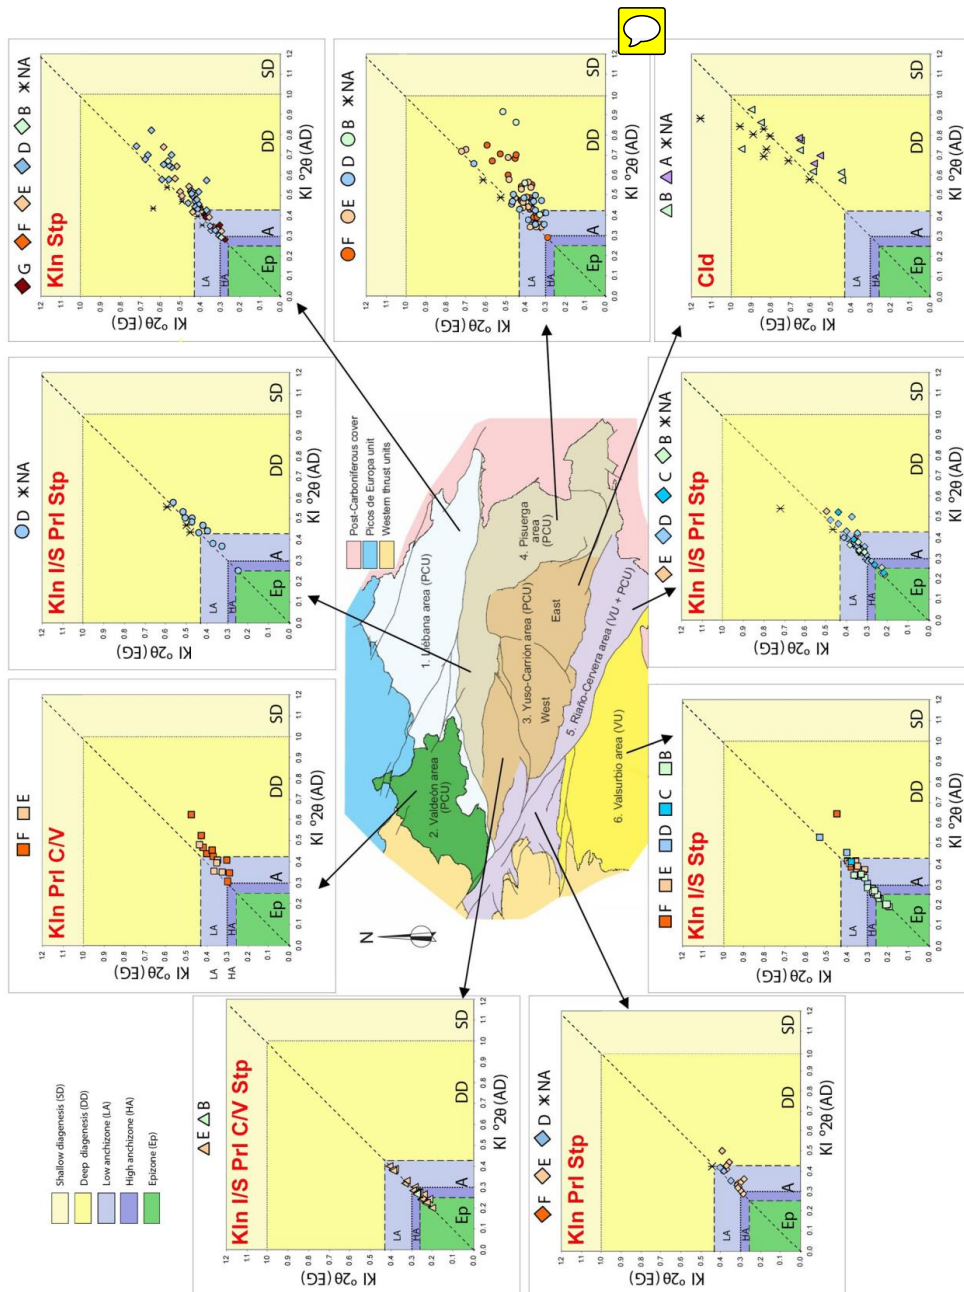



858 **Figure 7. Plot of Kübler Index (KI) measured on air dried (AD) versus KI measured on ethylene glycol**  
859 **solvated samples (EG), standardized at Kübler scale. DD, Shallow Diagenesis; LA, Low Anchizone; HA,**  
860 **High Anchizone; Ep, Epizone. Samples are plotted according to the areas outlined in Fig.4 and have been**  
861 **grouped following the divisions of Fig. 2: A, Silurian; B, Devonian; C, Tournasian-Visean; D, Prioro**  
862 **Group; E, Pando Group; F, Viorna Group; G, Campollo-Remoña Group. Samples with significant**  
863 **amounts of I/S,Pr1 and/or Pg-Pg/Ms are indicated as NA (not applicable). Minerals absent in each of the**  
864 **areas are indicated in red.**

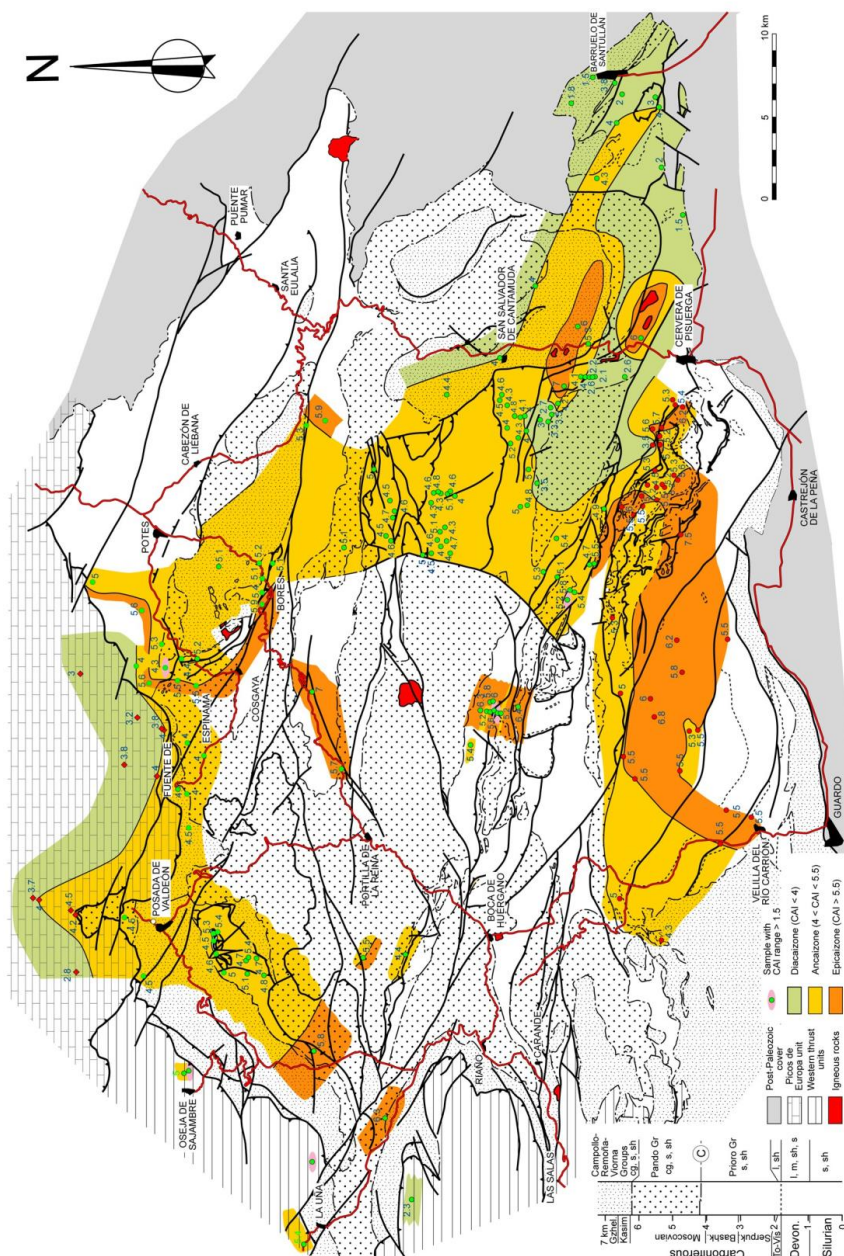

865

866 **Figure 8.** Map with location of CAI values and delimitation of CAI isogrades. Picos de Europa CAI data  
 867 after Bastida et al., 2004; Valsurbio CAI data after García-López et al., 2013. Symbols of the CAI  
 868 samples as in Fig. 2.



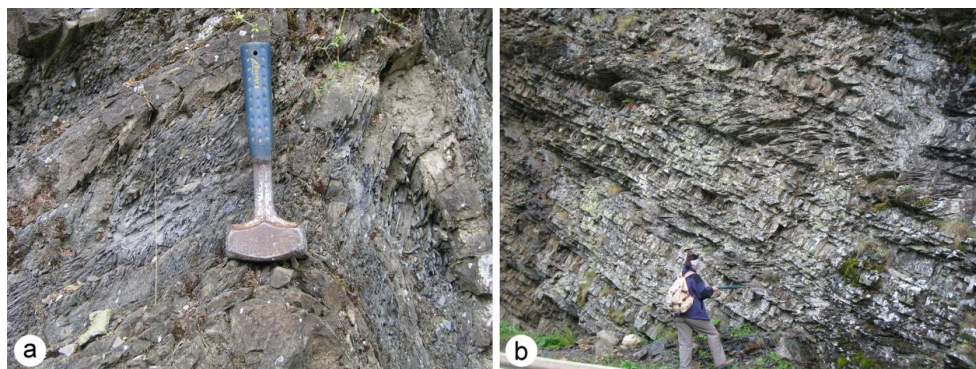

869  
870 **Figure 9. (a)  $S_1$  cleavage associated with a nearly upright fold (eastern part of the Liébana area; north to**  
871 **the right). (b)  $S_2$  cleavage less dipping than the bedding in a normal stratigraphic succession (Pando**  
872 **Group; Curavacas-Lechada syncline; north to the left).**

873
